# Supplementary material
Source: PubMed Central journal article supplement (PMC9593435)
Supplement: NIHMS1808860-supplement-Supplemental_Publication_Material.pdf [file NIHMS1808860-supplement-Supplemental_Publication_Material.pdf]

## DATA SUPPLEMENT

### Insights from a Large-Scale Whole-Genome Sequencing Study of Systolic Blood Pressure, Diastolic Blood Pressure, and Hypertension

Tanika N. Kelly,<sup>1,2,70</sup> Xiao Sun,<sup>1,70</sup> Karen Y. He,<sup>3,70</sup> Michael R. Brown,<sup>4,70</sup> Sarah A. Gagliano Taliun,<sup>5,70</sup> Jacklyn N. Hellwege,<sup>6,7,70</sup> Marguerite R. Irvin,<sup>8,70</sup> Xuenan Mi,<sup>1,70</sup> Jennifer A. Brody,<sup>9,70</sup> Nora Franceschini,<sup>10</sup> Xiuqing Guo,<sup>11</sup> Shih-Jen Hwang,<sup>12</sup> Paul S. de Vries,<sup>4</sup> Yan Gao,<sup>13</sup> Arden Moscati,<sup>14</sup> Girish N. Nadkarni,<sup>14,15</sup> Lisa R. Yanek,<sup>16</sup> Tali Elfassy,<sup>17</sup> Jennifer A. Smith,<sup>18</sup> Ren-Hua Chung,<sup>19</sup> Amber L. Beitelshes,<sup>20</sup> Amit Patki,<sup>21</sup> Stella Aslibekyan,<sup>8</sup> Brandon M. Blobner,<sup>22</sup> Juan M. Peralta,<sup>23</sup> Themistocles L. Assimes,<sup>24,25</sup> Walter R. Palmas,<sup>26</sup> Chunyu Liu,<sup>27</sup> Adam P. Bress,<sup>28</sup> Zhijie Huang,<sup>1</sup> Lewis C. Becker,<sup>29</sup> Chii-Min Hwa,<sup>30</sup> Jeffrey R. O'Connell,<sup>20</sup> Jenna C. Carlson,<sup>31</sup> Helen R. Warren,<sup>32,33</sup> Sayantan Das,<sup>5</sup> Ayush Giri,<sup>7,34</sup> Lisa W. Martin,<sup>35</sup> W. Craig Johnson,<sup>36</sup> Ervin R. Fox,<sup>37</sup> Erwin P. Bottinger,<sup>38</sup> Alexander C. Razavi,<sup>1</sup> Dhananjay Vaidya,<sup>16</sup> Lee-Ming Chuang,<sup>39</sup> Yen-Pei C. Chang,<sup>20</sup> Take Naseri,<sup>40</sup> Deepti Jain,<sup>36</sup> Hyun Min Kang,<sup>5</sup> Adriana M. Hung,<sup>7,41</sup> Vinodh Srinivasasainagendra,<sup>21</sup> Beverly M. Snively,<sup>42</sup> Dongfeng Gu,<sup>43</sup> May E. Montasser,<sup>20</sup> Muagututi'a Sefuiva Reupena,<sup>44</sup> Benjamin D. Heavner,<sup>36</sup> Jonathon LeFaive,<sup>5</sup> James E. Hixson,<sup>4</sup> Kenneth M. Rice,<sup>36</sup> Fei Fei Wang,<sup>36</sup> Jonas B. Nielsen,<sup>45,46</sup> Jianfeng Huang,<sup>43</sup> Alyna T. Khan,<sup>36</sup> Wei Zhou,<sup>47</sup> Jovia L. Nierenberg,<sup>1</sup> Cathy C. Laurie,<sup>36</sup> Nicole D. Armstrong,<sup>8</sup> Mengyao Shi,<sup>1</sup> Yang Pan,<sup>1</sup> Adrienne M. Stilp,<sup>36</sup> Leslie Emery,<sup>36</sup> Quenna Wong,<sup>36</sup> Nicola L. Hawley,<sup>48</sup> Ryan L. Minster,<sup>22</sup> Joanne E. Curran,<sup>23</sup> Patricia B. Munroe,<sup>32,33</sup> Daniel E. Weeks,<sup>22,49</sup> Kari E. North,<sup>9</sup> Russell P. Tracy,<sup>50</sup> Eimear E. Kenny,<sup>13,51</sup> Daichi Shimbo,<sup>52</sup> Aravinda Chakravarti,<sup>53</sup> Stephen S. Rich,<sup>54</sup> Alex P. Reiner,<sup>55</sup> John Blangero,<sup>23</sup> NHLBI Trans-Omics for Precision Medicine (TOPMed) Consortium, The Samoan Obesity, Lifestyle, and Genetic Adaptations Study (OLA GA) Group,<sup>56</sup> Susan Redline,<sup>57</sup> Braxton D. Mitchell,<sup>20,58</sup> Dabeeru C. Rao,<sup>59</sup> Yii-Der Ida Chen,<sup>11</sup> Sharon L.R. Kardia,<sup>18</sup> Robert C. Kaplan,<sup>60</sup> Rasika A. Mathias,<sup>61</sup> Jiang He,<sup>1,2</sup> Bruce M. Psaty,<sup>62,63</sup> Myriam Fornage,<sup>64,65</sup> Ruth J.F. Loos,<sup>13,66</sup> Adolfo Correa,<sup>67</sup> Eric Boerwinkle,<sup>4,68</sup> Jerome I. Rotter,<sup>11</sup> Charles Kooperberg,<sup>55</sup> Todd L. Edwards,<sup>7,69,71</sup> Gonçalo R. Abecasis,<sup>5,71</sup> Xiaofeng Zhu,<sup>3,71</sup> Daniel Levy,<sup>11,71</sup> Donna K. Arnett,<sup>70,71</sup> Alanna C. Morrison<sup>4,71</sup>

## Table of Contents

|                                                                          |    |
|--------------------------------------------------------------------------|----|
| Expanded Methods.....                                                    | 3  |
| Supplemental References.....                                             | 11 |
| Table S1.....                                                            | 12 |
| Table S2.....                                                            | 13 |
| Table S3.....                                                            | 19 |
| Table S4.....                                                            | 22 |
| Table S5.....                                                            | 24 |
| Table S6.....                                                            | 27 |
| Table S7.....                                                            | 29 |
| Table S8.....                                                            | 30 |
| Table S9.....                                                            | 33 |
| Table S10.....                                                           | 35 |
| Table S11.....                                                           | 39 |
| Table S12.....                                                           | 43 |
| Table S13.....                                                           | 45 |
| Table S14.....                                                           | 46 |
| Table S15.....                                                           | 50 |
| Table S16.....                                                           | 54 |
| Table S17.....                                                           | 57 |
| Table S18.....                                                           | 62 |
| Table S19.....                                                           | 65 |
| Table S20.....                                                           | 66 |
| Table S21.....                                                           | 69 |
| Table S22.....                                                           | 70 |
| Table S23.....                                                           | 72 |
| Figure S1.....                                                           | 73 |
| Figure S2.....                                                           | 80 |
| Figure S3.....                                                           | 82 |
| Author Affiliations.....                                                 | 83 |
| TOPMed Acknowledgements.....                                             | 85 |
| Study Specific Acknowledgements and Funding Sources.....                 | 87 |
| Disclosures.....                                                         | 91 |
| Million Veteran Program: Consortium Acknowledgement For Manuscripts..... | 92 |

## EXPANDED METHODS

### Stage-1 Studies

#### **The Amish Complex Disease Research Program (Amish)**

(<http://www.medschool.umaryland.edu/endocrinology/Amish-Research-Program/>): The Amish study includes a set of large community-based studies focused largely on cardiometabolic health carried out in the Old Order Amish (OOA) community of Lancaster County, Pennsylvania. Over 7,000 Amish have been recruited to date. This Amish community is a founder population who immigrated to Pennsylvania from Western Europe in the early 1700's, later expanding into other regions of the U.S. The Amish cohort participating in the Trans-Omics for Precision Medicine (TOPMed) Consortium BP analyses comprises 1,111 subjects  $\geq 18$  years of age from large multigenerational families who were recruited for specific protocols between 2001 and 2006. Subjects have been extensively phenotyped for a range of cardiometabolic traits, including anthropometry, lipids, blood pressure (BP), glucose and related measures, vascular imaging, and a range of other phenotypes. BP was measured at baseline in triplicate using a standard sphygmomanometer. All BP measures were taken with participants in the sitting position after 5 minutes of rest. For the current analysis, the average of the second and third blood pressure measurements was used for analysis. DNA samples have been collected and serum and plasma samples biobanked. The TOPMed Program has provided whole genome sequencing (WGS) data to complement genome-wide association study (GWAS) array data already collected in >5,000 Amish study participants. Due to their ancestral history, the OOA are enriched for rare exonic variants that arose in the population from a single founder (or small number of founders) and propagated through genetic drift. Many of these variants have large effect sizes and identifying them can lead to new biological insights about health and disease. A major goal of the TOPMed WGS sequencing efforts is to identify functional variants that underlie some of the large effect associations observed in this unique population.

**Atherosclerosis Risk in Communities (ARIC) Study:** The ARIC study is a population-based prospective cohort study of cardiovascular disease sponsored by the National Heart, Lung, and Blood Institute (NHLBI). ARIC included 15,792 individuals, predominantly European American and African American, aged 45-64 years at baseline (1987-89), chosen by probability sampling from four US communities. Cohort members completed three additional triennial follow-up examinations, a fifth exam in 2011-2013, a sixth exam in 2016-2017, and a seventh exam in 2018-2019. BP measures and medication use at the baseline exam were used in this study, which included 6,545 ARIC participants with WGS data from TOPMed and the CCDG programs. BP was measured using a standardized Hawksley random-zero mercury column sphygmomanometer with participants in a sitting position after a resting period of 5 minutes. The size of the cuff was chosen according to the arm circumference. Three sequential recordings for systolic and diastolic BP were obtained; the mean of the last two measurements was used in this analysis, discarding the first reading. BP lowering medication use was recorded from the medication history.

**The Cardiovascular Health Study (CHS):** The CHS is a population-based cohort study of risk factors for coronary heart disease and stroke in adults  $\geq 65$  years conducted across four field centers. The original predominantly European ancestry cohort of 5,201 persons was recruited in 1989-1990 from random samples of the Medicare eligibility lists; subsequently, an additional predominantly African-American cohort of 687 persons was enrolled for a total sample of 5,888. A subset of 3,622 CHS participants were selected for the TOPMed sequencing program which included African Americans participants, cases of idiopathic venous thromboembolism, myocardial infarction, coronary heart disease or stroke and a

random sample of “healthy elderly”. Blood samples were drawn from all participants at their baseline examination and DNA was subsequently extracted from available samples. Research staff with central training in BP measurement assessed two right-arm systolic and diastolic BP levels at baseline with a Hawksley random-zero sphygmomanometer. Measures were taken after five minutes of seated rest, with BP measurements taken one minute apart. Means of the two repeated BP measurements from the baseline examination were used for the analyses. CHS was approved by institutional review committees at each field center and the 2,839 individuals in the present analysis had available DNA and gave informed consent including consent to use of genetic information for the study of cardiovascular disease.

**The Cleveland Family Study (CFS):** The CFS is a family-based cohort study that aims to examine the genetic and familial basis of sleep apnea. The total cohort consists of 2,534 African- and European-American individuals from 356 families. 275 index probands with confirmed sleep apnea diagnoses were recruited from northern Ohio sleep centers. Neighborhood control probands with at least two living relatives available for study were also selected at random from a list provided by the index family. The spouses and relatives of the cases and controls were also recruited if available. Data was collected from up to four visits made from 1990 to 2006, and a final laboratory visit at a clinical research center between 2000 and 2006. Blood samples were obtained from individuals who participated in the final two exam cycles, and DNA was extracted from samples that passed quality control. When the current analysis was performed, WGS data was available for a total of 990 CFS participants through the TOPMed program. Two to three measurements of systolic and diastolic BP were obtained from the last available examination for each participant. BP measurements were taken in the sitting (n=350) or supine (n=640) positions following standardized guidelines and using a calibrated sphygmomanometer. The average of two BP measures were used in the current analyses. When three BP measures were available for a study participant, the first measure was discarded and the final two measures were averaged.

**Coronary Artery Risk Development in Young Adults (CARDIA):** CARDIA is a prospective multicenter study with 5,115 adults Caucasian and African American participants of the age group 18-30 years, recruited from four centers at the baseline examination in 1985-1986. The recruitment was done from the total community in Birmingham, AL, from selected census tracts in Chicago, IL and Minneapolis, MN; and from the Kaiser Permanente health plan membership in Oakland, CA. Details about study design for CARDIA have been previously published. Nine examinations have been completed since initiation of the study, respectively in the years 0, 2, 5, 7, 10, 15, 20, 25, and 30, with a tenth examination underway. Written informed consent was obtained from participants at each examination and all study protocols were approved by the institutional review boards of the participating institutions. Systolic and diastolic BP was measured in triplicate on the right arm using a random-zero sphygmomanometer with the participant seated and following a 5-min. rest. The average of the second and third measurements was taken as the BP value. BP medication use was obtained by questionnaire. WGS data is available for a subset of the cohort who provided informed consent and had genome-wide genotyping (N=2,930).

**Framingham Heart Study (FHS):** FHS is a community-based longitudinal study designed for cardiovascular diseases and heart-disease-related risk factors using family-based study design (<https://theframinghamheartstudy.org>). The FHS sample are Caucasians, including family members of three generations, the original, offspring and the Third-Generation, who have completed their first on-site clinical examinations in 1948, 1971, and 2002, respectively. Participants maintain on-site follow-up examinations an average of every 4 years and have consented for genetic studies, as well as the annual well-being survey. At each on-site examination, participants undergo a physician-administered physical examination, a face-to-face interview with research staff, and a self-administered questionnaire process.

Through the on-site examination researchers collect information on medical history, anthropometry, health status, medical and sociodemographic countenances, lifestyle characteristics, and blood or urine samples.

Examining physicians followed a standardized protocol for measuring BP among seated FHS participants. Specifically, they used a mercury column sphygmomanometer to collect two repeated measures of BP taken from the left arm. For the current analysis, the mean value of the two systolic and diastolic BP measures were used. In addition, we used BP values obtained at participants' first FHS examination to minimize medication-alteration. Information on anti-hypertension medication use was self-reported by the FHS participants at on-site examination. Fifteen mmHg was added to systolic BP and 10 mmHg was added to diastolic BP for participants who reported medication use for hypertension. In the late 1980s and through the 1990s, DNA was collected from living study participants of the original and offspring cohorts. DNA samples are available for participants of the Third-Generation cohort. A total of 3,615 TOPMed WGS participants who met the inclusion criteria for the BP analysis contributed to the current study.

**Genetic Epidemiology Network of Arteriopathy (GENOA):** The GENOA study consists of hypertensive sibships that were recruited for linkage and association studies in order to identify genes that influence BP and its target organ damage. In the initial phase of the GENOA study (Phase I: 1996-2001), all members of sibships containing  $\geq 2$  individuals with essential hypertension clinically diagnosed before age 60 were invited to participate, including both hypertensive and normotensive siblings. A total of 1,583 non-Hispanic whites from Rochester, MN, and 1,854 African Americans from Jackson, MS, were examined. Sitting systolic BP (SBP) (mmHg) and diastolic BP (DBP) (mmHg) were measured three times with a random zero sphygmomanometer. The average of the last two measurements at Phase I was used in this study. For subjects taking any anti-hypertensive (BP lowering) medications, 15 mmHg was added to SBP and 10 mmHg was added to DBP. A physician specializing in hypertension reviewed all medications and made the final determination of whether a medication was considered an anti-hypertensive. Only African Americans were sequenced through the TOPMed project, and participants who were also in the ARIC or Jackson Heart Study (JHS) were excluded from analysis. A total of 1,214 African American participants were included in the current analysis.

**Genetic Epidemiology Network of Salt-Sensitivity (GenSalt):** The GenSalt study is a unique NHLBI-sponsored family feeding-study designed to examine the interaction between genes and dietary sodium and potassium intake on BP. A total of 3,142 participants from 633 Han families from rural, north China were ascertained through a proband with untreated pre-hypertension or stage-1 hypertension identified from a population-based BP screening. A total of 1,906 GenSalt probands and their siblings, spouses, and offspring were eligible. Among them, 1,818 took part in the TOPMed WGS program and had BP and covariable data available for the current analysis.

All BP readings were measured by trained and certified observers using a random-zero sphygmomanometer and a standard protocol. BP was measured with the participant in the sitting position after 5 minutes of rest. In addition, participants were advised to avoid alcohol, cigarette smoking, coffee/tea, and exercise for at least 30 minutes prior to their BP measurements. Systolic and diastolic BP measures were taken in triplicate during each day of a three-day baseline observation. After throwing out the first measure, the subsequent two measures obtained on the first day of baseline observation were averaged and used in this analysis.

**Genetics of Lipid Lowering Drugs and Diet Network (GOLDN):** GOLDN is a family-based study of European descent individuals recruited in Minneapolis and Salt Lake City (two of the NHLBI Family Heart Study sites). It aims to uncover genetic predictors of variability in lipid phenotypes, which include both fasting and postprandial lipids quantified using traditional methods, NMR, and high-throughput lipidomics. During the initial screening of ~1,350 individuals, the following criteria were used for exclusion: age < 18 years; fasting triglycerides  $\geq 1500$  mg/dL; recent history of myocardial infarction, coronary bypass surgery, or coronary angioplasty; self-report of a positive history of liver, kidney, pancreas, or gallbladder disease, or a history of nutrient malabsorption; current use of insulin; abnormal liver or kidney function; in women of childbearing potential, pregnancy, breastfeeding, not using an acceptable form of contraception. Of those who enrolled, 1,048 individuals consented to the use of their DNA in research; 942 participants with data on all exposures, outcomes, and covariates were included in the current study. All participants had two repeated measures of blood pressure which were obtained using a standard protocol and an automated oscillometric device. Resting BP was measured in the morning while participants were in a sitting position. The average of the two BP measurements were used in this analysis.

**Genetic Studies of Atherosclerosis Risk (GeneSTAR):** GeneSTAR is an ongoing family-based prospective study designed to determine environmental, phenotypic, and genetic causes of premature cardiovascular disease. GeneSTAR was conducted originally in healthy adult European- and African-American siblings of probands with documented early onset coronary disease under 60 years of age at the time of hospitalization in any of 10 Baltimore area hospitals from 1982-2006. Participants were screened for traditional coronary disease and stroke risk factors and have been followed regularly to ascertain incident cardiovascular disease. Commencing in 2003, the siblings, their offspring, and the coparent of the offspring who were free of cardiovascular disease participated in a 2 week trial of aspirin 81 mg/day with pre and post ex vivo platelet function assessed using multiple agonists and were screened for traditional coronary disease and stroke risk factors. Of the total 3949 participants, 2142 had complete measures of platelet function; of those, 1786 were selected for TOPMed based on (1) participation in later GeneSTAR studies and (2) largest family size.

Data on medication use was obtained from a standardized interview, where information on medication name, dosage, indication, and frequency of use was collected. Participants who reported current use of any medication classified as an anti-hypertensive agent were coded as 'yes' for anti-hypertensive use. BP was measured using a standard mercury or aneroid sphygmomanometer, following the American Heart Association and JNC Guidelines. The mean of the second two resting BP readings taken during the baseline screening visit was used to characterize BP. A total of 1,735 GeneSTAR participants with WGS and BP data were included in the current analysis.

**Hispanic Community Health Study-Study of Latinos (HCHS-SOL):** HCHS/SOL is a prospective, population-based cohort study of 16,415 Hispanics/Latino adults (ages 18-74 years) recruited from randomly selected households in four US communities (Chicago, IL; Miami, FL; Bronx, NY; San Diego, CA) between 2008 and 2011. At baseline clinic examination, sitting BP was measured on the right arm using an OMRON HEM-907XL (Omron Healthcare, Inc., Lake Forest, IL) automatic sphygmomanometer by certified staff. Three sets of systolic and diastolic BPs were measured 1 minute apart after an initial 5-minute rest period, and the average of the last two measurements was used in the study. For those taking antihypertensive medication, 15mmHg was added to systolic BP and 10 mmHg was added to diastolic BP. A total of 1,590 participants with WGS data through TOPMed program were included in the current analysis.

**Hypertension Genetic Epidemiology Network (HyperGEN):** The HyperGEN study is one of the four networks in the Family Blood Pressure Program (FBPP) supported by the NHLBI to identify genetic contributors to hypertension. HyperGEN is a family-based study with a sib-pair design. Hypertensive African American sibships were recruited from Forsyth County, NC and from the community-at-large in Birmingham, AL from 1995 to 2000. Sib-pairs with hypertension onset before age 60 were recruited in the first phase. The study was subsequently extended to siblings and the offspring of the hypertensive probands who were unmedicated adults. BP was measured with an automated oscillometric device using a standard protocol. After a 5-minute resting period, BP was measured 6 times, with each BP measurement taken two minutes apart. The average of the second and third BP measurements was averaged and used in this analysis. In addition, we added 15 mm Hg to the SBP values and 10 mmHg to DBP values for subjects taking antihypertensive or BP-lowering medications. A total of 1,880 HyperGEN participants were included in the current analysis.

**Jackson Heart Study (JHS):** The JHS (<https://www.jacksonheartstudy.org>) is a large, population-based observational study evaluating the etiology of cardiovascular, renal, and respiratory diseases among African Americans residing in the three counties (Hinds, Madison, and Rankin) that make up the Jackson, Mississippi metropolitan area. Data and biologic materials have been collected from 5306 participants, including a nested family cohort of 1498 members of 264 families. The age at enrollment for the unrelated cohort was 35-84 years; the family cohort included related individuals >21 years old. Participants provided medical and social history and had an array of physical and biochemical measures and diagnostic procedures during a baseline examination (2000-2004) and two follow-up examinations (2005-2008 and 2009-2012). Samples for genomic DNA were collected during the first two examinations. Consent for genetic studies and broad sharing of genetic data was provided by 3,482 participants. After quality control, WGS data are available for 3,307 participants. The study population is characterized by a high prevalence of diabetes, hypertension, obesity, and related disorders. Annual follow-up interviews and cohort surveillance are ongoing, and preparation for a fourth examination is in progress. SBP and DBP were measured twice after the participant had been seated for 5 minutes. BP was measured using a Hawksley random-zero sphygmomanometer (Hawksley and Sons Ltd, Lancing, UK). The random-zero BP measurements were calibrated to an oscillometric device using robust regression. The average of the two BP measures were used for the current analysis.

**The Mount Sinai BioMe Biobank (BioMe):** The BioMe Biobank is an ongoing, prospective, hospital- and outpatient- based population research program operated by The Charles Bronfman Institute for Personalized Medicine (IPM) at Mount Sinai. BioMe has enrolled over 50,000 participants between September 2007 and July 2019. BioMe is an Electronic Medical Record (EMR)-linked biobank that integrates research data and clinical care information for consented patients at The Mount Sinai Medical Center, which serves diverse local communities of upper Manhattan with broad health disparities. IPM BioMe populations include 25% of African American ancestry (AA), 36% of Hispanic Latino ancestry (HL), 30% of white European ancestry (EA), and 9% of other ancestry. The BioMe disease burden is reflective of health disparities in the local communities. BioMe operations are fully integrated in clinical care processes, including direct recruitment from clinical sites waiting areas and phlebotomy stations by dedicated BioMe recruiters independent of clinical care providers, prior to or following a clinician standard of care visit. Recruitment currently occurs at a broad spectrum of over 30 clinical care sites. Information on anthropometrics, demographics, BP and use of BP-lowering medication was derived from participants' EMR. Full genetic and phenotype data for 3,155 individuals was available for analyses.

**Multi-ethnic Study of Atherosclerosis (MESA):** MESA is a study of the characteristics of subclinical cardiovascular disease and the risk factors that predict progression to clinically overt cardiovascular

disease or progression of the subclinical disease. MESA consisted of a diverse, population-based sample of an initial 6,814 asymptomatic men and women aged 45-84. Thirty-eight percent of the recruited participants were white, 28 percent African American, 22 percent Hispanic, and 12 percent Asian, predominantly of Chinese descent. Participants were recruited from six field centers across the United States: Wake Forest University, Columbia University, Johns Hopkins University, University of Minnesota, Northwestern University and University of California - Los Angeles. The first examination took place over two years, from July 2000 - July 2002. BP was measured after a 5-minute rest during clinical visits. BP was measured three times at 1 minute intervals using a Dinamap PRO 100 automated oscillometric device (Critikon, Tampa, FL) with the subject in seated, and the average of the second and third BP measurements was recorded for each visit. Antihypertensive medication use was recorded. Participants have been contacted every 9 to 12 months throughout the study to assess clinical morbidity and mortality. It was followed by four examination periods that were 17-20 months in length, and a sixth exam is currently taking place. A total of 4,526 MESA participants with available WGS and BP data were included in the current analysis.

**Samoan Study:** Genome-wide Association Study of Adiposity in Samoans. The parent Samoan study is a population-based GWAS of adiposity and cardiometabolic phenotypes among adults, 25-65 years of age, from the independent nation of Samoa in the South Pacific. The research goal of this study is to identify genetic variation that increases susceptibility to obesity and cardiometabolic phenotypes. Biomarker and questionnaire data were collected to assess cardiometabolic phenotypes. DNA was collected and the Affymetrix 6.0 chip used for SNP genotyping. After quality control checks on genotyping and excluding individuals with key missing data we have a final sample of 3,122 adults with high-quality genome-wide marker data. Participation in TOPMed provided WGS data for 1,284 individuals from the GWAS sample chosen for maximal informativity for our Samoan-specific imputation panel. BP was measured after a 10-minute seated rest period three times, with 3-minute rest periods between measurements, using an Omron HEM907 XL digital blood pressure monitor (Omron Healthcare, IL). Results of the second and third blood pressure measurements were averaged for used for the current analyses. A total of 1,261 participants with available WGS and phenotype data were included in this analysis.

**Taiwan Study of Hypertension using Rare Variants (THRIV):** THRIV proposed to identify rare and low frequency genetic variants for BP and hypertension through whole exome sequencing of a subset of highly enriched Taiwan Chinese hypertensive families and as many matched controls. The Taiwan Chinese families (N=1,200) were previously recruited as part of the NHLBI-sponsored SAPPHIRE Network which is part of the FBPP. The SAPPHIRE families were recruited to have multiple hypertensive sibs and some of them also included one normotensive/hypotensive sib. The matched controls (N=1,200) were selected from the large population-based HALST Study and a Hospital-based population, both in Taipei, Taiwan. Resting BP was measured in triplicate using a standard protocol and automated DINAMAP device. The average of the second and third BP readings were averaged and used in the current analysis.

**WHI (Women's Health Initiative):** WHI is a long-term national health study that focuses on strategies for preventing common diseases such as heart disease, cancer and fracture in postmenopausal women. A total of 161,808 women aged 50–79 years old were recruited from 40 clinical centers in the US between 1993 and 1998. WHI consists of an observational study, two clinical trials of postmenopausal hormone therapy (HT, estrogen alone or estrogen plus progestin), a calcium and vitamin D supplement trial, and a dietary modification trial. The WHI contribution of TOPMed was designed as a case-control study of stroke and venous thromboembolism (VTE). Approximately 5,000 stroke and 1,000 VTE cases and 5,000 controls were selected for WGS. The controls were selected to frequency match the cases by age at



recruitment, ethnicity, and membership in the WHI hormone therapy trial. Study protocols and consent forms were approved by the IRB at all participating institutions. Self-reported medications were collected using standardized questionnaires at the screening visit and BP was measured in a clinical visit by certified staff using standardized procedures and instruments. Two BP measures were recorded after 5 minutes rest using a mercury sphygmomanometer. Appropriate cuff bladder size was determined at each visit based on arm circumference. Diastolic BP was taken from the phase V Korotkoff measures. The average of the two measurements, obtained 30 seconds apart, was used in analyses. We added a constant to measured BP for individuals taking anti-hypertensive medications. A total of 10,860 WHI participants with WGS and BP data were included in the current analysis.

### **Stage-1 Quality Control of TOPMed Freeze 6 Data**

A detailed description of WGS methods have been reported previously.<sup>1</sup> Briefly, WGS at a mean depth of at least 30X was conducted using Illumina HiSeq X Ten instruments at six sequencing centers. Variant discovery and genotype calling were conducted jointly across the 18 discovery stage studies using the GotCloud pipeline at the University of Michigan Informatics Research Center.<sup>2</sup> This procedure resulted in a single, multi-study genotype call set that underwent rigorous variant, genotype, and sample quality control procedures. After setting genotypes with read depth less than 10X to missing, additional quality control included the removal of variants failing the support vector machine filter, with excess heterozygosity or Mendelian inconsistencies, overlapping centromeric or other low complexity regions, or with missingness greater than 5%. Sample quality filtering excluded duplicate samples from the same individual, samples with sex discrepancies, misidentified samples, or consent issues, and those of poor quality based on concordance of WGS and array data.

### **Stage-1 Phenotype Harmonization**

Quality control and harmonization of SBP, DBP, and hypertension phenotypes across studies followed a standard protocol developed by the TOPMed BP Working Group. All participants included in the discovery stage analysis had at least two sitting measures of blood pressure at a single clinical study visit and information on current use of antihypertension medication. Prior to harmonization, each study removed unlikely BP values, such as SBP<60 mmHg, SBP>300 mmHg, or DBP>SBP. Phenotype harmonization involved using the mean of two BP measures from a study visit to estimate SBP and DBP for each participant. For longitudinal studies, we used BP measures obtained at the first visit, which optimized sample size and minimized the percent of participants taking antihypertension medications. If a participant was taking antihypertension medication, SBP and DBP values were imputed by adding 15 and 10 mmHg, respectively, to observed values.<sup>3</sup> Hypertension was defined as mean SBP≥140 mmHg, mean DBP≥90 mmHg, or current use of anti-hypertension medication. The systolic and diastolic BP thresholds selected are consistent with the definition of stage-2 hypertension, according to the American College of Cardiology and American Heart Association guidelines. A stringent hypertension definition was used to enrich cases for disease causing variants. Continuous SBP and DBP phenotypes were transformed within each ancestry strata by first regressing BP on age, sex, body mass index (BMI), study, and the first 11 ancestry principal components (PCs). BP residuals then underwent rank-based inverse normal transformation and were subsequently rescaled by multiplying the transformed value by the standard deviation of the original harmonized BP phenotype, an approach that allowed subsequent effect size estimates to reflect clinically meaningful values in mmHg.

### **Stage-2 Studies**

In UK Biobank, genome-wide array-based genotypes were phased using Eagle v2.4,<sup>4</sup> converted from GRCh37 to GRCh38 using LiftOver,<sup>5</sup> and imputed using the TOPMed freeze 5 reference panel with Minimac4.<sup>1</sup> Whole exomes were captured using a modified version of the IDT xGen probe library and

sequenced using on the Illumina NovaSeq 6000 platform. Resting BP was measured twice during a clinical visit using a standardized protocol and Omron electronic BP monitor. The SBP, DBP, and hypertension phenotypes were harmonized and transformed using the same protocol that was implemented in stage-1. Individual SNVs identified in stage-1 were tested for association with the continuous and binary BP phenotypes using respective linear and logistic mixed models implemented in SAIGE.<sup>6</sup> These models adjusted for age, sex, BMI, and ancestry PCs and accounted known and cryptic relatedness, in this instance, using a genetic relatedness matrix. Stage-1 gene-based signals from aggregate rare variant analyses were tested in stage-2 using an optimized sequence kernel association test (SKAT-O) implemented in our mixed model framework in SAIGE-Gene.

REGARDS participants were genotyped using Illumina Infinium Multi-Ethnic AMR/AFR BeadChip arrays (MEGA chip; Illumina, Inc., San Diego, CA). BP was measured during the in-home baseline study visit twice using aneroid sphygmomanometers following a standardized protocol by trained examiners. Participants were asked to sit for five minutes with both feet on the floor prior to the first BP measurement and there was a 30 second rest between measurements. The average of the two measurements was recorded. Among those taking antihypertension medication, 15 mmHg and 10 mmHg were added to SBP and DBP values, respectively. Hypertension was defined as SBP>140 mmHg, DBP>90 mmHg, or use of anti-hypertension medication. GWAS of the continuous BP and binary hypertension phenotypes were performed using linear and logistic regression models, respectively, with adjustment for age, sex, BMI, and ancestry PCs. These analyses were performed using PLINK2 software.

MVP participants were genotyped using the Affymetrix Axiom Biobank array. These data were phased using Eagle v2.3<sup>4</sup> and imputed to the 1KG Project<sup>7</sup> phase 3, version 5 reference panel using Minimac3. Multiple measures of SBP over time were derived from electronic health records. GWAS analyses used the median SBP value, along with DBP and covariable information derived from the same time-point. Among those taking antihypertension medication, 15 mmHg and 10 mmHg were added to SBP and DBP values, respectively. Hypertension was defined as SBP>140 mmHg, DBP>90 mmHg, or use of anti-hypertension medication. GWAS of the continuous BP and binary hypertension phenotypes were performed using linear and logistic regression models, respectively, with adjustment for age, age<sup>2</sup>, sex, BMI, and ancestry PCs. These analyses were performed using SNPTEST-v2.5.4-beta.

### **Conditional and Gene-Tissue Expression (GTEx) Analyses**

Conditional analyses were conducted to fine map and verify the independence of potentially novel signals from previously reported BP loci by conditioning the variant signal on all previously reported variants at the locus. Furthermore, identified variants were tested for association with expression of genes in *cis* (defined as genes with a transcription start site within 1 Mb of the variant) using Gene-Tissue Expression (GTEx) v8 WGS (dbGaP phs000424.v8.p2 ) and gene expression data from 49 tissues (including 2 cell lines) in up to 838 participants (<https://www.gtexportal.org/home/documentationPage#staticTextAnalysisMethods>).

## SUPPLEMENTAL REFERENCES

1. Taliun D, Harris DN, Kessler MD, Carlson J, Szpiech ZA, Torres R, Gagliano Taliun SA, Corvelo A, Gogarten SM, Kang HM, et al. Sequencing of 53,831 diverse genomes from the NHLBI TOPMed Program. *Nature* 2021; 590:290-299.
2. Jun G, Wing MK, Abecasis GR, Kang HM. An efficient and scalable analysis framework for variant extraction and refinement from population-scale DNA sequence data. *Genome Res.* 2015;25:918–925.
3. Tobin MD, Sheehan NA, Scurrah KJ, Burton PR. Adjusting for treatment effects in studies of quantitative traits: Antihypertensive therapy and systolic blood pressure. *Stat Med.* 2005;24:2911–2935.
4. Loh PR, Danecek P, Palamara PF, Fuchsberger C, Reshef YA, Finucane HK, Schoenherr S, Forer L, McCarthy S, Abecasis GR, Drubin R, Price AL. A Reference-based phasing using the Haplotype Reference Consortium panel. *Nat Genet.* 2016;48:1443–1448.
5. Casper J, Zweig AS, Villarreal C, Tyner C, Speir ML, Rosenbloom KR, Raney BJ, Lee CM, Lee BT, Karolchik D, et al. The UCSC Genome Browser database: 2018 update. *Nucleic Acids Res.* 2017;46:D762–D769.
6. Zhou W, Nielsen JB, Fritsche LG, Dey R, Gabrielsen ME, Wolford BN, LeFaive J, VandeHaar P, Gagliano SA, Gifford A, et al. Efficiently controlling for case-control imbalance and sample relatedness in large-scale genetic association studies. *Nat Genet.* 2018;50:1335–1341.
7. 1000 Genomes Project Consortium, Auton A, Brooks LD, Durbin RM, Garrison EP, Kang HM, Korbel JO, Marchini JL, McCarthy S, McVean GA, Abecasis GR. A global reference for human genetic variation. *Nature.* 2015;526:68–74.
8. Das S, Forer L, Schönherr S, Sidore C, Locke AE, Kwong A, Vrieze SI, Chew EY, Levy S, McGue M, Schlessinger D, Stambolian D, Loh P-R, Iacono WG, Swaroop A, Scott LJ, Cucca F, Kronenberg F, Boehnke M, Abecasis GR, Fuchsberger C. Next-generation genotype imputation service and methods. *Nat Genet.* 2016;48:1284–1287.

**Table S1.** Characteristics of 51,456 participants included in the stage-1 WGS study, according to ancestry.

| <b>Ancestry</b> | <b>N</b> | <b>Mean age* (s.d.)</b> | <b>Women, %</b> | <b>Mean BMI† (s.d.)</b> | <b>Mean SBP‡ (s.d.)</b> | <b>Mean DBP‡ (s.d.)</b> | <b>HTN§, %</b> | <b>Anti-HTN medicine, %</b> |
|-----------------|----------|-------------------------|-----------------|-------------------------|-------------------------|-------------------------|----------------|-----------------------------|
| African         | 13,836   | 51.9 (15.8)             | 66.5            | 30.7 (7.3)              | 128.8 (20.8)            | 75.7 (11.2)             | 56.3           | 46.0                        |
| Asian           | 3,796    | 47.1 (13.4)             | 52.2            | 24.1 (3.5)              | 123.4 (20.8)            | 75.1 (12.1)             | 36.2           | 22.1                        |
| European        | 28,390   | 55.8 (15.7)             | 68.0            | 27.2 (5.5)              | 124.0 (19.1)            | 72.3 (10.4)             | 37.8           | 25.9                        |
| Hispanic        | 4,173    | 55.4 (14.5)             | 64.6            | 30.0 (6.4)              | 127.2 (21.6)            | 73.1 (11.4)             | 48.2           | 35.8                        |
| Samoaan         | 1,261    | 44.6 (11.3)             | 60.3            | 33.6 (6.7)              | 128.4 (19.1)            | 82.0 (13.0)             | 32.0           | 7.2                         |

BMI, body mass index; DBP, diastolic blood pressure (BP); HTN, hypertension; SBP, systolic BP.

\*Age in years. †Measurements in kg/m<sup>2</sup>. ‡Measurements in mmHg. §Defined as SBP≥140, DBP≥90 or use of anti-HTN medication.

**Table S2.** Novel lead variants achieving  $P < 1E-06$  in single marker analyses of the multi-ancestry TOPMed sample.

| Chr               | Position (B38)        | rsID         | Ref | Alt | AAF    | Loc | Phe | TOPMed |      |                 | UKBB   |       |          | MVP   |      |          | REGARDS |      |          | Meta-Analysis |      |                 |
|-------------------|-----------------------|--------------|-----|-----|--------|-----|-----|--------|------|-----------------|--------|-------|----------|-------|------|----------|---------|------|----------|---------------|------|-----------------|
|                   |                       |              |     |     |        |     |     | Beta   | SE   | P               | Beta   | SE    | P        | Beta  | SE   | P        | Beta    | SE   | P        | Beta          | SE   | P               |
| <i>Novel Loci</i> |                       |              |     |     |        |     |     |        |      |                 |        |       |          |       |      |          |         |      |          |               |      |                 |
| 1                 | 53004394              | rs4926583    | A   | C   | 0.13   | 1   | SBP | -0.89  | 0.18 | 6.93E-07        | -0.01  | 0.06  | 8.32E-01 | 0.00  | 0.06 | 9.54E-01 | NA      | NA   | NA       | -0.06         | 0.04 | 1.82E-01        |
| 1                 | 71055350              | rs1396751049 | A   | G   | 0.0002 | 2   | SBP | -21.55 | 4.16 | 2.29E-07        | -4.43  | 29.80 | 8.82E-01 | NA    | NA   | NA       | NA      | NA   | NA       | -21.22        | 4.12 | 2.67E-07        |
| 1                 | 160906765             | rs889484496  | C   | T   | 0.0002 | 3   | HTN | 3.16   | 0.56 | <b>1.26E-08</b> | NA     | NA    | NA       | NA    | NA   | NA       | NA      | NA   | NA       | NA            | NA   | NA              |
| 2                 | 7653714*              | rs1462610506 | G   | A   | 0.0001 | 4   | SBP | -32.57 | 5.97 | <b>4.99E-08</b> | -59.79 | 37.28 | 1.09E-01 | NA    | NA   | NA       | NA      | NA   | NA       | -33.25        | 5.90 | <b>1.73E-08</b> |
| 2                 | 141889431             | rs990096779  | A   | C   | 0.0001 | 5   | SBP | -27.26 | 5.54 | 8.73E-07        | NA     | NA    | NA       | NA    | NA   | NA       | NA      | NA   | NA       | NA            | NA   | NA              |
| 2                 | 214211381             | rs574793711  | A   | T   | 0.0004 | 6   | HTN | -1.96  | 0.38 | 2.01E-07        | -1.82  | 8.26  | 8.26E-01 | NA    | NA   | NA       | 0.25    | 0.48 | 6.07E-01 | -1.13         | 0.30 | 1.48E-04        |
| 3                 | 380679                | rs932205533  | C   | T   | 0.0001 | 7   | DBP | 17.01  | 3.38 | 4.89E-07        | 61.07  | 22.42 | 6.44E-03 | NA    | NA   | NA       | NA      | NA   | NA       | 17.99         | 3.34 | 7.42E-08        |
| 3                 | 60081049              | rs2630149    | C   | A   | 0.37   | 8   | SBP | -0.66  | 0.13 | 3.15E-07        | -0.13  | 0.05  | 1.10E-02 | -0.03 | 0.04 | 4.88E-01 | NA      | NA   | NA       | -0.10         | 0.03 | 1.36E-03        |
| 3                 | 60090146              | rs4679628    | C   | A   | 0.68   | 8   | DBP | 0.38   | 0.08 | 9.36E-07        | 0.04   | 0.03  | 1.78E-01 | 0.03  | 0.03 | 3.92E-01 | 0.11    | 0.16 | 4.84E-01 | 0.06          | 0.02 | 3.88E-03        |
| 3                 | 62426785              | rs189713255  | C   | T   | 0.004  | 9   | HTN | -0.69  | 0.13 | <b>3.03E-08</b> | 0.51   | 0.71  | 4.72E-01 | 0.02  | 0.08 | 8.47E-01 | 0.06    | 0.17 | 7.22E-01 | -0.15         | 0.06 | 1.42E-02        |
| 4                 | 14112599              | rs991813513  | C   | T   | 0.0001 | 10  | SBP | -27.72 | 5.45 | 3.59E-07        | -3.35  | 3.29  | 3.08E-01 | NA    | NA   | NA       | NA      | NA   | NA       | -9.87         | 2.82 | 4.58E-04        |
| 4                 | 32295377              | rs563161224  | C   | T   | 0.0001 | 11  | DBP | -16.47 | 3.25 | 4.01E-07        | -0.14  | 1.16  | 9.05E-01 | NA    | NA   | NA       | NA      | NA   | NA       | -2.00         | 1.10 | 6.85E-02        |
| 4                 | 44148142 <sup>†</sup> | rs142082332  | T   | A   | 0.0011 | 12  | DBP | -5.83  | 1.18 | 8.44E-07        | 1.67   | 7.34  | 8.20E-01 | NA    | NA   | NA       | NA      | NA   | NA       | -5.64         | 1.17 | 1.40E-06        |
| 4                 | 71695559              | rs146985843  | T   | G   | 0.001  | 13  | HTN | -1.01  | 0.20 | 4.74E-07        | 0.07   | 0.13  | 6.02E-01 | NA    | NA   | NA       | 0.40    | 0.42 | 3.42E-01 | -0.20         | 0.10 | 5.43E-02        |
| 4                 | 135102674             | rs763094728  | G   | A   | 0.000  | 14  | SBP | 16.86  | 3.40 | 7.25E-07        | 0.06   | 0.99  | 9.55E-01 | NA    | NA   | NA       | NA      | NA   | NA       | 1.37          | 0.95 | 1.50E-01        |
| 5                 | 25019911              | rs6874667    | G   | C   | 0.06   | 15  | DBP | -0.83  | 0.17 | 7.98E-07        | -0.57  | 0.28  | 4.53E-02 | 0.07  | 0.09 | 4.10E-01 | 0.24    | 0.21 | 2.53E-01 | -0.11         | 0.07 | 1.30E-01        |
| 5                 | 30143572              | rs148958561  | C   | T   | 0.006  | 16  | HTN | -0.50  | 0.10 | 8.19E-07        | -0.50  | 0.81  | 5.36E-01 | 0.01  | 0.06 | 8.58E-01 | 0.13    | 0.12 | 2.96E-01 | -0.09         | 0.05 | 6.54E-02        |
| 5                 | 81811929              | rs181227642  | C   | T   | 0.0001 | 17  | SBP | 31.09  | 6.11 | 3.61E-07        | NA     | NA    | NA       | NA    | NA   | NA       | NA      | NA   | NA       | NA            | NA   | NA              |
| 7                 | 9276283               | rs892358621  | C   | T   | 0.0001 | 18  | HTN | 3.86   | 0.75 | 2.69E-07        | -0.25  | 0.56  | 6.57E-01 | NA    | NA   | NA       | NA      | NA   | NA       | 1.21          | 0.45 | 6.70E-03        |
| 7                 | 86352300 <sup>‡</sup> | rs1009138170 | G   | A   | 0.0003 | 19  | SBP | 19.70  | 3.92 | 5.06E-07        | NA     | NA    | NA       | -2.97 | 2.38 | 2.12E-01 | NA      | NA   | NA       | 3.14          | 2.04 | 1.23E-01        |
| 7                 | 86389044              | rs370834859  | C   | A   | 0.0003 | 19  | DBP | 10.87  | 2.06 | 1.39E-07        | NA     | NA    | NA       | NA    | NA   | NA       | NA      | NA   | NA       | NA            | NA   | NA              |
| 7                 | 93871514              | rs1166654114 | T   | C   | 0.0001 | 20  | HTN | -3.63  | 0.72 | 4.32E-07        | -31.22 | 22.47 | 1.65E-01 | NA    | NA   | NA       | NA      | NA   | NA       | -3.66         | 0.72 | 3.47E-07        |
| 7                 | 120623195             | rs959927014  | A   | T   | 0.0001 | 21  | DBP | 14.12  | 2.86 | 7.96E-07        | 49.71  | 38.11 | 1.92E-01 | NA    | NA   | NA       | NA      | NA   | NA       | 14.32         | 2.85 | 5.17E-07        |
| 7                 | 120907812             | rs578061109  | T   | A   | 0.0001 | 21  | HTN | 3.77   | 0.74 | 3.17E-07        | -0.20  | 0.26  | 4.45E-01 | NA    | NA   | NA       | NA      | NA   | NA       | 0.24          | 0.25 | 3.21E-01        |
| 7                 | 142607166             | rs56349639   | G   | A   | 0.07   | 22  | DBP | 0.67   | 0.14 | 8.31E-07        | 0.02   | 0.04  | 6.32E-01 | NA    | NA   | NA       | 0.24    | 0.46 | 6.11E-01 | 0.09          | 0.04 | 4.17E-02        |
| 8                 | 8373964               | rs575133860  | C   | T   | 0.0001 | 23  | SBP | -25.24 | 5.13 | 8.64E-07        | 2.47   | 2.64  | 3.49E-01 | NA    | NA   | NA       | NA      | NA   | NA       | -3.34         | 2.35 | 1.55E-01        |
| 8                 | 87524937              | rs533133339  | T   | C   | 0.002  | 24  | DBP | -3.87  | 0.77 | 4.55E-07        | 0.13   | 0.23  | 5.84E-01 | 0.16  | 0.47 | 7.39E-01 | -2.97   | 3.42 | 3.86E-01 | -0.15         | 0.20 | 4.60E-01        |
| 8                 | 87524937              | rs533133339  | T   | C   | 0.002  | 24  | SBP | -6.48  | 1.32 | 9.18E-07        | 0.43   | 0.40  | 2.86E-01 | 0.45  | 0.63 | 4.69E-01 | 5.78    | 5.85 | 3.24E-01 | 0.03          | 0.33 | 9.34E-01        |
| 8                 | 107340941             | rs538833666  | T   | C   | 0.002  | 25  | HTN | 0.88   | 0.18 | 6.88E-07        | 0.03   | 0.05  | 5.13E-01 | NA    | NA   | NA       | -0.13   | 0.61 | 8.31E-01 | 0.08          | 0.04 | 6.39E-02        |
| 8                 | 135907343             | rs191358526  | A   | T   | 0.001  | 26  | HTN | 1.15   | 0.23 | 6.27E-07        | NA     | NA    | NA       | NA    | NA   | NA       | NA      | NA   | NA       | NA            | NA   | NA              |

|    |           |              |                  |   |        |    |     |        |      |                 |        |       |          |       |      |          |       |      |          |        |      |          |
|----|-----------|--------------|------------------|---|--------|----|-----|--------|------|-----------------|--------|-------|----------|-------|------|----------|-------|------|----------|--------|------|----------|
| 8  | 137338862 | rs569370277  | AT               | A | 0.007  | 27 | DBP | 2.22   | 0.45 | 8.00E-07        | -0.25  | 3.46  | 9.41E-01 | 0.28  | 0.27 | 2.96E-01 | -0.33 | 0.60 | 5.88E-01 | 0.64   | 0.21 | 2.81E-03 |
| 9  | 5567352   | rs749617638  | G                | A | 0.0001 | 28 | DBP | 16.70  | 3.34 | 5.83E-07        | 1.96   | 1.94  | 3.13E-01 | NA    | NA   | NA       | NA    | NA   | NA       | 5.68   | 1.68 | 7.19E-04 |
| 9  | 72031527  | rs531405529  | C                | T | 0.0007 | 29 | HTN | -1.39  | 0.28 | 9.90E-07        | 0.06   | 0.09  | 5.36E-01 | NA    | NA   | NA       | 0.98  | 1.14 | 3.90E-01 | -0.07  | 0.09 | 3.92E-01 |
| 9  | 77018488  | rs907073171  | G                | C | 0.0009 | 30 | DBP | 6.07   | 1.22 | 6.51E-07        | NA     | NA    | NA       | NA    | NA   | NA       | -2.17 | 1.77 | 2.20E-01 | 3.42   | 1.01 | 6.68E-04 |
| 9  | 80991323  | rs373277444  | T                | C | 0.0001 | 31 | HTN | -3.23  | 0.65 | 7.56E-07        | NA     | NA    | NA       | NA    | NA   | NA       | NA    | NA   | NA       | NA     | NA   | NA       |
| 9  | 101019274 | rs1829803343 | CT               | C | 0.0003 | 32 | SBP | 19.86  | 3.88 | 3.01E-07        | NA     | NA    | NA       | NA    | NA   | NA       | NA    | NA   | NA       | NA     | NA   | NA       |
| 10 | 23308387  | rs11013376   | C                | G | 0.08   | 33 | SBP | -1.39  | 0.26 | 6.98E-08        | 0.26   | 0.22  | 2.26E-01 | -0.10 | 0.09 | 2.97E-01 | NA    | NA   | NA       | -0.18  | 0.08 | 3.06E-02 |
| 12 | 11216526  | rs535260317  | C                | T | 0.0001 | 34 | SBP | 29.17  | 5.25 | <b>2.74E-08</b> | 4.48   | 4.69  | 3.40E-01 | NA    | NA   | NA       | NA    | NA   | NA       | 15.43  | 3.50 | 1.01E-05 |
| 13 | 52274686  | rs548695515  | G                | A | 0.0005 | 35 | DBP | 8.28   | 1.62 | 3.23E-07        | NA     | NA    | NA       | -0.94 | 0.82 | 2.52E-01 | NA    | NA   | NA       | 0.94   | 0.73 | 1.98E-01 |
| 13 | 98785378  | rs575544397  | C                | T | 0.0007 | 36 | DBP | 6.97   | 1.41 | 7.82E-07        | NA     | NA    | NA       | -0.70 | 0.95 | 4.61E-01 | -3.21 | 1.82 | 7.78E-02 | 0.91   | 0.72 | 2.06E-01 |
| 14 | 58479635  | rs760711883  | TAG <sup>A</sup> | T | 0.02   | 37 | DBP | -1.14  | 0.22 | 4.03E-07        | -0.01  | 0.06  | 8.85E-01 | -0.04 | 0.09 | 6.30E-01 | -0.04 | 0.66 | 9.56E-01 | -0.08  | 0.05 | 1.23E-01 |
| 14 | 59185891  | rs371613755  | G                | A | 0.0001 | 38 | SBP | -27.78 | 5.36 | 2.21E-07        | -6.85  | 4.45  | 1.23E-01 | NA    | NA   | NA       | NA    | NA   | NA       | -15.38 | 3.42 | 6.99E-06 |
| 14 | 87679583  | rs150713962  | T                | A | 0.0004 | 39 | HTN | -1.93  | 0.36 | 8.09E-08        | NA     | NA    | NA       | NA    | NA   | NA       | -0.22 | 0.46 | 6.27E-01 | -1.29  | 0.28 | 5.95E-06 |
| 15 | 28094070  | rs528063737  | T                | C | 0.0009 | 40 | SBP | 9.90   | 2.02 | 8.94E-07        | -0.86  | 0.67  | 2.03E-01 | NA    | NA   | NA       | NA    | NA   | NA       | 0.22   | 0.64 | 7.30E-01 |
| 15 | 35547150  | rs565076535  | CAAC             | C | 0.006  | 41 | SBP | 4.18   | 0.84 | 7.17E-07        | -43.88 | 33.93 | 1.96E-01 | 0.32  | 0.42 | 4.38E-01 | NA    | NA   | NA       | 1.08   | 0.37 | 3.98E-03 |
| 17 | 10736438  | rs138965752  | A                | G | 0.003  | 42 | HTN | -0.79  | 0.15 | 8.19E-08        | -0.01  | 0.07  | 8.46E-01 | -0.06 | 0.37 | 8.80E-01 | -1.42 | 1.16 | 2.23E-01 | -0.15  | 0.06 | 1.37E-02 |
| 18 | 67293512  | rs11877435   | A                | G | 0.09   | 43 | HTN | -0.13  | 0.03 | 2.34E-07        | 0.01   | 0.01  | 1.25E-01 | 0.00  | 0.01 | 7.61E-01 | -0.02 | 0.08 | 8.35E-01 | 0.00   | 0.01 | 9.70E-01 |
| 18 | 69556248  | rs568824589  | C                | A | 0.0007 | 44 | DBP | -7.17  | 1.44 | 5.96E-07        | -19.60 | 22.65 | 3.87E-01 | -1.40 | 1.46 | 3.38E-01 | 0.65  | 1.87 | 7.29E-01 | -3.21  | 0.90 | 3.45E-04 |
| 20 | 14356827  | rs752530366  | C                | A | 0.0009 | 45 | SBP | -10.36 | 1.99 | 1.88E-07        | -2.77  | 1.33  | 3.74E-02 | NA    | NA   | NA       | NA    | NA   | NA       | -5.11  | 1.10 | 3.74E-06 |
| 20 | 45220398  | rs8183137    | C                | A | 0.007  | 46 | DBP | -2.37  | 0.47 | 6.07E-07        | 3.18   | 5.04  | 5.28E-01 | 0.00  | 0.64 | 9.94E-01 | NA    | NA   | NA       | -1.50  | 0.38 | 7.75E-05 |
| 20 | 56748383  | rs375606398  | G                | A | 0.001  | 47 | HTN | 1.13   | 0.21 | 1.24E-07        | NA     | NA    | NA       | NA    | NA   | NA       | NA    | NA   | NA       | NA     | NA   | NA       |
| 21 | 38363851  | rs187484456  | C                | T | 0.0006 | 48 | HTN | 1.60   | 0.33 | 9.54E-07        | -1.52  | 0.79  | 5.33E-02 | NA    | NA   | NA       | NA    | NA   | NA       | 1.14   | 0.30 | 1.56E-04 |
| 22 | 21877466  | rs538476214  | G                | T | 0.0002 | 49 | DBP | -11.92 | 2.42 | 8.17E-07        | NA     | NA    | NA       | NA    | NA   | NA       | NA    | NA   | NA       | NA     | NA   | NA       |

*Novel variants from previously reported loci*

|   |                       |              |    |   |        |    |     |        |      |          |        |       |          |       |      |          |       |      |          |        |      |          |
|---|-----------------------|--------------|----|---|--------|----|-----|--------|------|----------|--------|-------|----------|-------|------|----------|-------|------|----------|--------|------|----------|
| 1 | 5806611               | rs74049495   | C  | T | 0.04   | 1  | HTN | -0.20  | 0.04 | 9.12E-07 | NA     | NA    | NA       | -0.01 | 0.02 | 6.17E-01 | 0.08  | 0.05 | 1.16E-01 | -0.04  | 0.02 | 3.58E-02 |
| 1 | 10429054              | rs148861708  | G  | A | 0.0002 | 2  | SBP | -23.82 | 4.69 | 3.88E-07 | NA     | NA    | NA       | NA    | NA   | NA       | NA    | NA   | NA       | NA     | NA   | NA       |
| 1 | 36845873              | rs966779519  | T  | C | 0.0003 | 3  | HTN | -2.48  | 0.49 | 4.66E-07 | -0.75  | 2.83  | 7.90E-01 | NA    | NA   | NA       | NA    | NA   | NA       | -2.43  | 0.48 | 5.42E-07 |
| 1 | 112064726             | rs550856031  | G  | C | 0.0003 | 4  | SBP | -20.48 | 3.94 | 2.00E-07 | -32.57 | 75.69 | 6.67E-01 | NA    | NA   | NA       | NA    | NA   | NA       | -20.51 | 3.93 | 1.84E-07 |
| 1 | 150513095             | rs12031974   | T  | C | 0.999  | 5  | SBP | 12.46  | 2.37 | 1.44E-07 | NA     | NA    | NA       | NA    | NA   | NA       | 4.68  | 3.31 | 1.58E-01 | 9.82   | 1.93 | 3.40E-07 |
| 1 | 171639054             | rs41263718   | C  | T | 0.12   | 6  | DBP | -0.55  | 0.11 | 6.31E-07 | -0.03  | 0.04  | 4.48E-01 | -0.06 | 0.04 | 1.72E-01 | 0.21  | 0.22 | 3.47E-01 | -0.08  | 0.03 | 8.72E-03 |
| 2 | 35187494 <sup>§</sup> | rs1572465247 | GA | G | 0.002  | 7  | HTN | -1.01  | 0.20 | 2.61E-07 | -22.00 | 10.91 | 4.38E-02 | 0.02  | 0.19 | 9.11E-01 | -0.63 | 0.23 | 7.49E-03 | -0.51  | 0.12 | 1.28E-05 |
| 2 | 71882926              | rs889387219  | G  | A | 0.0003 | 8  | DBP | 11.93  | 2.43 | 8.81E-07 | -35.34 | 26.17 | 1.77E-01 | NA    | NA   | NA       | NA    | NA   | NA       | 11.53  | 2.42 | 1.84E-06 |
| 2 | 214824553             | rs912831463  | T  | G | 0.0003 | 9  | DBP | -11.79 | 2.41 | 9.69E-07 | NA     | NA    | NA       | NA    | NA   | NA       | NA    | NA   | NA       | NA     | NA   | NA       |
| 2 | 237894197             | rs140263198  | C  | T | 0.0006 | 10 | HTN | 1.56   | 0.32 | 8.75E-07 | -1.17  | 2.29  | 6.08E-01 | NA    | NA   | NA       | NA    | NA   | NA       | 1.51   | 0.31 | 1.58E-06 |

|    |                        |              |   |    |        |    |     |        |      |          |        |       |          |       |      |          |       |      |          |        |      |          |
|----|------------------------|--------------|---|----|--------|----|-----|--------|------|----------|--------|-------|----------|-------|------|----------|-------|------|----------|--------|------|----------|
| 2  | 241963149              | rs567873302  | T | C  | 0.0003 | 11 | DBP | -11.33 | 2.23 | 3.67E-07 | NA     | NA    | NA       | NA    | NA   | NA       | NA    | NA   | NA       | NA     | NA   | NA       |
| 3  | 123913288              | rs186997509  | C | G  | 0.001  | 12 | HTN | -1.37  | 0.27 | 4.54E-07 | 0.05   | 0.28  | 8.47E-01 | -0.09 | 0.25 | 7.22E-01 | -0.22 | 0.35 | 5.28E-01 | -0.42  | 0.14 | 3.03E-03 |
| 3  | 159745965              | rs146308569  | T | A  | 0.003  | 13 | DBP | -3.49  | 0.68 | 3.01E-07 | -3.76  | 5.12  | 4.63E-01 | 0.04  | 0.35 | 9.12E-01 | NA    | NA   | NA       | -0.70  | 0.31 | 2.29E-02 |
| 4  | 23985590               | rs536671665  | T | C  | 0.0004 | 14 | HTN | 1.94   | 0.39 | 6.78E-07 | 0.14   | 0.37  | 7.11E-01 | 0.14  | 0.38 | 7.04E-01 | NA    | NA   | NA       | 0.71   | 0.22 | 1.27E-03 |
| 4  | 76564270 <sup>  </sup> | rs115879419  | G | A  | 0.0004 | 15 | DBP | -9.19  | 1.87 | 8.38E-07 | 109.67 | 60.75 | 7.10E-02 | -0.21 | 0.91 | 8.16E-01 | -0.36 | 2.39 | 8.82E-01 | -1.75  | 0.77 | 2.34E-02 |
| 5  | 4261835                | rs116759517  | G | A  | 0.004  | 16 | HTN | -0.59  | 0.12 | 9.22E-07 | 0.35   | 0.44  | 4.22E-01 | 0.02  | 0.07 | 7.31E-01 | 0.05  | 0.15 | 7.35E-01 | -0.10  | 0.06 | 8.17E-02 |
| 5  | 159633157              | rs1044263121 | T | C  | 0.0002 | 17 | DBP | 15.96  | 3.04 | 1.58E-07 | -6.90  | 3.65  | 5.83E-02 | NA    | NA   | NA       | NA    | NA   | NA       | 6.57   | 2.34 | 4.94E-03 |
| 5  | 172024835              | rs779225390  | A | G  | 0.0001 | 18 | DBP | -14.72 | 2.86 | 2.67E-07 | 0.01   | 0.69  | 9.89E-01 | NA    | NA   | NA       | NA    | NA   | NA       | -0.81  | 0.67 | 2.31E-01 |
| 6  | 33005486               | rs3128936    | A | T  | 0.60   | 19 | HTN | 0.08   | 0.02 | 6.39E-07 | 0.00   | 0.01  | 7.46E-01 | 0.00  | 0.01 | 7.29E-01 | 0.00  | 0.03 | 9.76E-01 | 0.01   | 0.00 | 1.74E-01 |
| 6  | 43409521               | rs1214755    | G | A  | 0.90   | 20 | HTN | -0.13  | 0.03 | 1.51E-07 | -0.02  | 0.01  | 6.73E-03 | -0.02 | 0.01 | 1.16E-01 | -0.09 | 0.06 | 1.24E-01 | -0.03  | 0.01 | 7.04E-06 |
| 6  | 95514748               | rs186696749  | G | A  | 0.0003 | 21 | DBP | -10.52 | 2.10 | 5.79E-07 | 4.16   | 34.41 | 9.04E-01 | NA    | NA   | NA       | NA    | NA   | NA       | -10.46 | 2.10 | 6.31E-07 |
| 6  | 169255785              | rs149346837  | T | C  | 0.002  | 22 | HTN | -0.94  | 0.18 | 2.54E-07 | -1.29  | 1.54  | 4.01E-01 | NA    | NA   | NA       | 0.09  | 0.28 | 7.36E-01 | -0.64  | 0.15 | 2.75E-05 |
| 7  | 18813701               | rs564948273  | C | T  | 0.0003 | 23 | HTN | -2.36  | 0.46 | 2.81E-07 | NA     | NA    | NA       | NA    | NA   | NA       | NA    | NA   | NA       | NA     | NA   | NA       |
| 7  | 27247464               | rs186177734  | C | G  | 0.003  | 24 | HTN | 0.70   | 0.14 | 4.90E-07 | -1.20  | 0.79  | 1.26E-01 | NA    | NA   | NA       | -0.11 | 0.17 | 5.27E-01 | 0.35   | 0.11 | 1.04E-03 |
| 7  | 73727423               | rs530529907  | C | A  | 0.0005 | 25 | DBP | -8.76  | 1.73 | 4.04E-07 | -8.53  | 6.73  | 2.05E-01 | NA    | NA   | NA       | NA    | NA   | NA       | -8.74  | 1.67 | 1.76E-07 |
| 7  | 76931441               | rs188780722  | C | T  | 0.0008 | 26 | HTN | -1.35  | 0.27 | 5.24E-07 | -11.30 | 16.00 | 4.80E-01 | NA    | NA   | NA       | -0.06 | 0.35 | 8.71E-01 | -0.88  | 0.21 | 3.96E-05 |
| 7  | 106438072              | rs1013536627 | G | A  | 0.0002 | 27 | DBP | 12.43  | 2.50 | 6.52E-07 | 0.32   | 0.62  | 6.12E-01 | NA    | NA   | NA       | NA    | NA   | NA       | 1.02   | 0.60 | 9.01E-02 |
| 7  | 151027237              | rs6953514    | T | C  | 0.09   | 28 | SBP | 1.15   | 0.23 | 4.00E-07 | 0.14   | 0.10  | 1.64E-01 | 0.15  | 0.07 | 3.65E-02 | NA    | NA   | NA       | 0.21   | 0.06 | 2.17E-04 |
| 8  | 52941509               | rs565101557  | A | G  | 0.0005 | 29 | DBP | -8.40  | 1.71 | 8.83E-07 | NA     | NA    | NA       | -0.79 | 1.18 | 5.00E-01 | 1.39  | 1.87 | 4.57E-01 | -2.26  | 0.86 | 8.67E-03 |
| 8  | 140001243              | rs578246850  | G | T  | 0.001  | 30 | SBP | 9.39   | 1.86 | 4.53E-07 | 0.66   | 0.62  | 2.86E-01 | NA    | NA   | NA       | -4.37 | 8.26 | 5.97E-01 | 1.51   | 0.59 | 1.02E-02 |
| 9  | 134415900              | rs188233102  | G | A  | 0.0008 | 31 | SBP | -10.58 | 2.16 | 9.57E-07 | 0.82   | 0.80  | 3.04E-01 | NA    | NA   | NA       | NA    | NA   | NA       | -0.55  | 0.75 | 4.62E-01 |
| 10 | 21363678               | rs115722966  | G | C  | 0.01   | 32 | DBP | 1.72   | 0.35 | 8.08E-07 | 1.07   | 0.53  | 4.16E-02 | 0.10  | 0.20 | 6.18E-01 | 0.94  | 0.48 | 4.92E-02 | 0.61   | 0.16 | 1.09E-04 |
| 10 | 28836801               | rs187784229  | C | T  | 0.005  | 33 | DBP | 2.40   | 0.49 | 8.95E-07 | -0.11  | 0.16  | 4.85E-01 | NA    | NA   | NA       | -3.37 | 1.84 | 6.69E-02 | 0.11   | 0.15 | 4.63E-01 |
| 10 | 73511521               | rs529232710  | G | T  | 0.0005 | 34 | HTN | 1.96   | 0.39 | 6.87E-07 | NA     | NA    | NA       | NA    | NA   | NA       | NA    | NA   | NA       | NA     | NA   | NA       |
| 10 | 93038333               | rs541185854  | T | TA | 0.007  | 35 | DBP | 2.28   | 0.43 | 1.01E-07 | -0.06  | 0.18  | 7.13E-01 | 0.81  | 1.92 | 6.73E-01 | -0.06 | 1.75 | 9.74E-01 | 0.27   | 0.16 | 9.05E-02 |
| 11 | 30758017               | rs759526273  | G | A  | 0.0005 | 36 | SBP | -12.80 | 2.56 | 5.95E-07 | -9.19  | 6.62  | 1.65E-01 | NA    | NA   | NA       | NA    | NA   | NA       | -12.33 | 2.39 | 2.51E-07 |
| 11 | 63656287               | rs181639791  | T | G  | 0.0003 | 37 | SBP | 18.27  | 3.48 | 1.49E-07 | -0.09  | 2.80  | 9.73E-01 | -2.25 | 2.09 | 2.80E-01 | NA    | NA   | NA       | 2.23   | 1.51 | 1.39E-01 |
| 12 | 12607733               | rs118057078  | C | A  | 0.002  | 38 | HTN | -0.94  | 0.18 | 1.63E-07 | 2.63   | 3.98  | 5.09E-01 | NA    | NA   | NA       | NA    | NA   | NA       | -0.93  | 0.18 | 1.97E-07 |
| 12 | 14176419               | rs557148731  | G | A  | 0.002  | 39 | HTN | -0.90  | 0.18 | 5.13E-07 | 0.15   | 0.54  | 7.75E-01 | 0.21  | 0.11 | 5.47E-02 | -0.22 | 0.21 | 2.97E-01 | -0.11  | 0.08 | 2.08E-01 |
| 12 | 19446565               | rs574863317  | T | C  | 0.0002 | 40 | SBP | 22.24  | 4.45 | 5.61E-07 | NA     | NA    | NA       | NA    | NA   | NA       | NA    | NA   | NA       | NA     | NA   | NA       |
| 12 | 53249550               | rs145405677  | G | A  | 0.0009 | 41 | DBP | -5.83  | 1.16 | 5.12E-07 | NA     | NA    | NA       | NA    | NA   | NA       | NA    | NA   | NA       | NA     | NA   | NA       |
| 12 | 55408999               | rs958667188  | T | C  | 0.0002 | 42 | SBP | -18.57 | 3.79 | 9.83E-07 | NA     | NA    | NA       | NA    | NA   | NA       | NA    | NA   | NA       | NA     | NA   | NA       |
| 12 | 89929715               | rs796212487  | G | A  | 0.02   | 43 | SBP | -1.98  | 0.40 | 7.15E-07 | NA     | NA    | NA       | NA    | NA   | NA       | -1.07 | 1.24 | 3.91E-01 | -1.89  | 0.38 | 6.28E-07 |
| 13 | 29924833               | rs182650574  | G | A  | 0.0001 | 44 | DBP | -15.34 | 3.09 | 6.65E-07 | 9.50   | 10.03 | 3.44E-01 | -0.24 | 1.53 | 8.77E-01 | NA    | NA   | NA       | -2.98  | 1.36 | 2.82E-02 |

|    |           |              |   |     |        |    |     |        |      |                 |       |      |                 |       |      |          |       |      |          |       |      |                 |
|----|-----------|--------------|---|-----|--------|----|-----|--------|------|-----------------|-------|------|-----------------|-------|------|----------|-------|------|----------|-------|------|-----------------|
| 13 | 96399768  | rs9516682    | A | G   | 0.38   | 45 | SBP | 0.62   | 0.13 | 8.33E-07        | 0.12  | 0.05 | 1.49E-02        | 0.00  | 0.04 | 9.81E-01 | -0.08 | 0.29 | 7.88E-01 | 0.07  | 0.03 | 1.08E-02        |
| 13 | 96399768  | rs9516682    | A | G   | 0.38   | 45 | HTN | 0.08   | 0.02 | 6.29E-07        | 0.02  | 0.01 | 4.13E-03        | 0.00  | 0.01 | 6.16E-01 | 0.06  | 0.03 | 7.13E-02 | 0.01  | 0.00 | 6.71E-04        |
| 13 | 111403978 | rs1056873364 | G | C   | 0.0006 | 46 | SBP | -12.08 | 2.41 | 5.51E-07        | -1.34 | 1.73 | 4.38E-01        | NA    | NA   | NA       | NA    | NA   | NA       | -4.99 | 1.41 | 3.89E-04        |
| 14 | 22811645  | rs141077504  | T | C   | 0.005  | 47 | SBP | -5.19  | 0.97 | 7.85E-08        | -4.87 | 6.86 | 4.78E-01        | 0.05  | 0.36 | 8.98E-01 | 0.06  | 1.12 | 9.57E-01 | -0.54 | 0.32 | 9.34E-02        |
| 14 | 23304280  | rs927479517  | A | G   | 0.0003 | 47 | HTN | -2.03  | 0.40 | 4.42E-07        | NA    | NA   | NA              | NA    | NA   | NA       | NA    | NA   | NA       | NA    | NA   | NA              |
| 14 | 59509859  | rs374539360  | C | T   | 0.0001 | 48 | SBP | -29.27 | 5.60 | 1.74E-07        | NA    | NA   | NA              | NA    | NA   | NA       | NA    | NA   | NA       | NA    | NA   | NA              |
| 14 | 89608947  | rs117378667  | C | A   | 0.01   | 49 | HTN | -0.33  | 0.06 | 3.46E-07        | 0.01  | 0.02 | 5.60E-01        | -0.04 | 0.04 | 3.38E-01 | 0.21  | 0.23 | 3.58E-01 | -0.02 | 0.02 | 2.04E-01        |
| 15 | 26628999  | rs990895163  | C | T   | 0.0001 | 50 | SBP | -26.84 | 5.47 | 9.46E-07        | NA    | NA   | NA              | NA    | NA   | NA       | NA    | NA   | NA       | NA    | NA   | NA              |
| 15 | 74439850  | rs1019875382 | C | T   | 0.0001 | 51 | DBP | 14.92  | 2.85 | 1.68E-07        | -1.07 | 0.99 | 2.75E-01        | NA    | NA   | NA       | NA    | NA   | NA       | 0.63  | 0.93 | 4.98E-01        |
| 15 | 96338035  | rs34353956   | C | AAC | 0.25   | 52 | DBP | -0.46  | 0.09 | 1.30E-07        | NA    | NA   | NA              | -0.04 | 0.04 | 3.18E-01 | -0.07 | 0.31 | 8.19E-01 | -0.12 | 0.04 | 1.17E-03        |
| 16 | 10510935  | rs188073931  | C | T   | 0.0002 | 53 | SBP | 26.76  | 5.34 | 5.31E-07        | NA    | NA   | NA              | -4.13 | 1.48 | 5.43E-03 | NA    | NA   | NA       | -1.91 | 1.43 | 1.82E-01        |
| 16 | 49743010  | rs375915281  | T | G   | 0.0003 | 54 | HTN | 2.95   | 0.55 | 9.27E-08        | -2.30 | 1.96 | 2.40E-01        | NA    | NA   | NA       | NA    | NA   | NA       | 2.56  | 0.53 | 1.42E-06        |
| 16 | 59640176  | rs999280636  | G | A   | 0.0001 | 55 | HTN | -4.06  | 0.71 | <b>1.02E-08</b> | -0.57 | 0.94 | 5.44E-01        | NA    | NA   | NA       | NA    | NA   | NA       | -2.79 | 0.57 | 7.82E-07        |
| 17 | 78431329  | rs376726828  | G | A   | 0.0003 | 56 | SBP | -20.28 | 4.05 | 5.36E-07        | 7.01  | 3.86 | 6.92E-02        | NA    | NA   | NA       | NA    | NA   | NA       | -5.99 | 2.79 | 3.19E-02        |
| 17 | 81131161  | rs144434820  | C | T   | 0.003  | 57 | DBP | -3.32  | 0.68 | 9.04E-07        | 0.13  | 0.22 | 5.54E-01        | NA    | NA   | NA       | 4.76  | 3.26 | 1.44E-01 | -0.17 | 0.20 | 4.05E-01        |
| 19 | 7325055   | rs36136513   | A | G   | 0.45   | 58 | DBP | -0.36  | 0.07 | 4.18E-07        | -0.28 | 0.03 | <b>3.24E-22</b> | NA    | NA   | NA       | -0.57 | 0.17 | 1.11E-03 | -0.30 | 0.03 | <b>2.32E-29</b> |
| 19 | 10221104  | rs563785784  | C | T   | 0.0005 | 59 | SBP | -13.30 | 2.70 | 8.73E-07        | 0.80  | 1.10 | 4.69E-01        | NA    | NA   | NA       | NA    | NA   | NA       | -1.20 | 1.02 | 2.37E-01        |
| 19 | 17071566  | rs1026811864 | C | T   | 0.0002 | 60 | DBP | 13.95  | 2.81 | 6.57E-07        | NA    | NA   | NA              | NA    | NA   | NA       | NA    | NA   | NA       | NA    | NA   | NA              |
| 19 | 33403836  | rs932829441  | T | TG  | 0.0001 | 61 | DBP | 18.17  | 3.63 | 5.70E-07        | NA    | NA   | NA              | NA    | NA   | NA       | NA    | NA   | NA       | NA    | NA   | NA              |
| 19 | 33460006  | rs963318995  | C | T   | 0.0001 | 61 | HTN | 3.60   | 0.73 | 7.73E-07        | -2.06 | 2.44 | 3.99E-01        | NA    | NA   | NA       | NA    | NA   | NA       | 3.13  | 0.70 | 6.93E-06        |
| 19 | 40205764  | rs528766533  | C | T   | 0.0006 | 62 | SBP | -13.02 | 2.66 | 9.52E-07        | NA    | NA   | NA              | 0.51  | 1.01 | 6.15E-01 | NA    | NA   | NA       | -1.21 | 0.95 | 2.02E-01        |
| 20 | 10405335  | rs372944937  | A | C   | 0.0001 | 63 | DBP | -16.17 | 3.07 | 1.40E-07        | NA    | NA   | NA              | NA    | NA   | NA       | NA    | NA   | NA       | NA    | NA   | NA              |
| 21 | 36123658  | rs192304372  | G | A   | 0.0005 | 64 | HTN | -1.78  | 0.35 | 3.81E-07        | NA    | NA   | NA              | NA    | NA   | NA       | 0.06  | 0.51 | 9.02E-01 | -1.19 | 0.29 | 3.86E-05        |

*Previously reported variants*

|   |          |            |   |   |      |   |     |       |      |                 |       |      |                 |       |      |                 |       |      |          |       |      |                 |
|---|----------|------------|---|---|------|---|-----|-------|------|-----------------|-------|------|-----------------|-------|------|-----------------|-------|------|----------|-------|------|-----------------|
| 1 | 10736490 | rs17035646 | G | A | 0.32 | 1 | SBP | 0.88  | 0.14 | <b>1.02E-10</b> | 0.57  | 0.05 | <b>5.22E-29</b> | 0.39  | 0.04 | <b>3.33E-23</b> | 0.73  | 0.34 | 2.97E-02 | 0.48  | 0.03 | <b>9.99E-57</b> |
| 1 | 10736809 | rs880315   | T | C | 0.32 | 1 | HTN | 0.10  | 0.02 | <b>9.33E-09</b> | 0.05  | 0.01 | <b>3.78E-16</b> | 0.06  | 0.01 | <b>4.61E-15</b> | 0.06  | 0.04 | 1.30E-01 | 0.05  | 0.00 | <b>8.75E-36</b> |
| 1 | 10736809 | rs880315   | T | C | 0.32 | 1 | DBP | 0.40  | 0.08 | 3.48E-07        | NA    | NA   | NA              | 0.27  | 0.03 | <b>4.76E-20</b> | 0.28  | 0.19 | 1.44E-01 | 0.28  | 0.03 | <b>1.18E-25</b> |
| 1 | 11823674 | rs12567136 | C | T | 0.13 | 2 | DBP | -0.54 | 0.10 | 2.26E-07        | -0.64 | 0.04 | <b>1.36E-68</b> | -0.36 | 0.04 | <b>6.88E-21</b> | -0.37 | 0.24 | 1.20E-01 | -0.51 | 0.03 | <b>5.89E-88</b> |
| 1 | 11845794 | rs61764044 | A | G | 0.04 | 2 | SBP | -1.65 | 0.31 | 1.44E-07        | -1.77 | 0.11 | <b>1.48E-63</b> | -0.98 | 0.09 | <b>1.42E-27</b> | -1.33 | 0.74 | 7.26E-02 | -1.33 | 0.07 | <b>1.32E-88</b> |
| 2 | 26689211 | rs1275986  | C | A | 0.49 | 3 | DBP | -0.41 | 0.08 | 5.43E-08        | -0.33 | 0.03 | <b>5.97E-33</b> | -0.27 | 0.03 | <b>1.35E-19</b> | -0.16 | 0.18 | 3.73E-01 | -0.31 | 0.02 | <b>2.72E-56</b> |
| 2 | 26696221 | rs1275982  | C | T | 0.47 | 3 | SBP | -0.79 | 0.13 | <b>1.92E-09</b> | -0.66 | 0.05 | <b>1.54E-40</b> | -0.49 | 0.04 | <b>4.79E-35</b> | -0.39 | 0.32 | 2.28E-01 | -0.57 | 0.03 | <b>1.40E-79</b> |
| 2 | 26700227 | rs1275978  | C | T | 0.47 | 3 | HTN | -0.10 | 0.02 | <b>9.46E-10</b> | -0.05 | 0.01 | <b>1.41E-21</b> | -0.06 | 0.01 | <b>1.60E-15</b> | -0.07 | 0.04 | 4.94E-02 | -0.06 | 0.00 | <b>7.40E-43</b> |
| 3 | 27521497 | rs2643826  | C | T | 0.55 | 4 | SBP | 0.74  | 0.14 | <b>4.53E-08</b> | 0.49  | 0.05 | <b>3.20E-24</b> | 0.37  | 0.04 | <b>2.17E-18</b> | 0.00  | 0.40 | 9.94E-01 | 0.44  | 0.03 | <b>2.38E-45</b> |
| 3 | 27521497 | rs2643826  | C | T | 0.55 | 4 | DBP | 0.41  | 0.08 | 1.82E-07        | 0.14  | 0.03 | 2.00E-07        | 0.19  | 0.03 | <b>1.66E-09</b> | -0.21 | 0.23 | 3.62E-01 | 0.18  | 0.02 | <b>1.07E-18</b> |



|    |           |            |    |   |      |    |     |       |      |                 |       |      |                  |       |      |                 |       |      |          |       |      |                  |
|----|-----------|------------|----|---|------|----|-----|-------|------|-----------------|-------|------|------------------|-------|------|-----------------|-------|------|----------|-------|------|------------------|
| 3  | 41996388  | rs77014899 | T  | C | 0.15 | 5  | DBP | 0.54  | 0.10 | 6.22E-08        | 0.45  | 0.04 | <b>6.59E-30</b>  | 0.16  | 0.04 | 2.28E-05        | -0.24 | 0.23 | 2.95E-01 | 0.31  | 0.03 | <b>4.02E-32</b>  |
| 3  | 169405049 | rs17485157 | G  | A | 0.17 | 6  | DBP | -0.53 | 0.09 | <b>2.00E-08</b> | -0.30 | 0.03 | <b>2.50E-20</b>  | -0.15 | 0.03 | 1.97E-05        | -0.70 | 0.29 | 1.70E-02 | -0.25 | 0.02 | <b>1.04E-27</b>  |
| 3  | 169447385 | rs1918973  | A  | G | 0.58 | 6  | SBP | -0.72 | 0.13 | <b>1.79E-08</b> | -0.46 | 0.05 | <b>2.47E-21</b>  | -0.14 | 0.04 | 1.06E-04        | -0.19 | 0.28 | 5.00E-01 | -0.28 | 0.03 | <b>5.61E-23</b>  |
| 4  | 80259918  | rs10857147 | A  | T | 0.25 | 7  | HTN | 0.10  | 0.02 | <b>3.32E-08</b> | 0.10  | 0.01 | <b>6.96E-66</b>  | 0.12  | 0.01 | <b>4.99E-51</b> | 0.02  | 0.05 | 6.22E-01 | 0.11  | 0.00 | <b>3.80E-121</b> |
| 4  | 80263187  | rs16998073 | A  | T | 0.25 | 7  | DBP | 0.55  | 0.08 | <b>7.83E-11</b> | 0.56  | 0.03 | <b>2.17E-78</b>  | 0.38  | 0.03 | <b>4.10E-34</b> | -0.03 | 0.23 | 8.83E-01 | 0.47  | 0.02 | <b>5.51E-115</b> |
| 4  | 80263187  | rs16998073 | A  | T | 0.25 | 7  | SBP | 0.84  | 0.14 | <b>4.95E-09</b> | 1.06  | 0.05 | <b>1.02E-90</b>  | 0.49  | 0.04 | <b>3.29E-32</b> | -0.58 | 0.40 | 1.44E-01 | 0.71  | 0.03 | <b>5.34E-111</b> |
| 4  | 102267552 | rs13107325 | C  | T | 0.05 | 8  | DBP | -0.99 | 0.16 | <b>1.06E-09</b> | -0.80 | 0.05 | <b>1.27E-53</b>  | -0.47 | 0.06 | <b>1.32E-17</b> | -0.66 | 0.52 | 2.06E-01 | -0.66 | 0.04 | <b>6.24E-73</b>  |
| 5  | 158560240 | rs2963481  | C  | T | 0.29 | 9  | SBP | 0.68  | 0.14 | 5.36E-07        | 0.42  | 0.05 | <b>1.16E-15</b>  | 0.27  | 0.04 | <b>3.79E-11</b> | NA    | NA   | NA       | 0.34  | 0.03 | <b>3.35E-28</b>  |
| 6  | 43388113  | rs2396004  | A  | G | 0.45 | 10 | HTN | -0.09 | 0.02 | <b>1.26E-08</b> | -0.03 | 0.01 | 1.86E-07         | -0.04 | 0.01 | <b>1.07E-08</b> | -0.04 | 0.04 | 3.85E-01 | -0.04 | 0.00 | <b>8.00E-19</b>  |
| 6  | 43388113  | rs2396004  | A  | G | 0.45 | 10 | SBP | -0.96 | 0.13 | <b>5.46E-13</b> | -0.30 | 0.05 | <b>9.03E-10</b>  | -0.33 | 0.04 | <b>1.32E-15</b> | -0.69 | 0.36 | 5.58E-02 | -0.35 | 0.03 | <b>6.93E-31</b>  |
| 6  | 126805001 | rs13196855 | T  | C | 0.36 | 11 | DBP | 0.38  | 0.08 | 7.32E-07        | 0.30  | 0.03 | <b>2.92E-28</b>  | 0.18  | 0.03 | <b>8.82E-10</b> | 0.21  | 0.20 | 2.99E-01 | 0.25  | 0.02 | <b>3.38E-39</b>  |
| 6  | 165767459 | rs6932812  | C  | G | 0.16 | 12 | DBP | -0.67 | 0.11 | <b>3.86E-10</b> | -0.37 | 0.05 | <b>7.96E-12</b>  | -0.21 | 0.05 | 2.97E-06        | -0.01 | 0.17 | 9.77E-01 | -0.30 | 0.03 | <b>1.00E-20</b>  |
| 6  | 165767459 | rs6932812  | C  | G | 0.16 | 12 | SBP | -0.95 | 0.19 | 2.75E-07        | -0.61 | 0.10 | <b>3.37E-10</b>  | -0.17 | 0.06 | 3.65E-03        | -0.32 | 0.30 | 2.84E-01 | -0.34 | 0.05 | <b>2.27E-12</b>  |
| 8  | 11466488  | rs2618484  | C  | A | 0.23 | 13 | SBP | -0.76 | 0.15 | 3.08E-07        | -0.28 | 0.05 | 5.17E-08         | -0.12 | 0.04 | 6.46E-03        | NA    | NA   | NA       | -0.21 | 0.03 | <b>4.77E-11</b>  |
| 10 | 18431916  | rs11014204 | C  | T | 0.20 | 14 | SBP | -0.77 | 0.15 | 5.05E-07        | -0.78 | 0.05 | <b>2.38E-47</b>  | -0.35 | 0.04 | <b>1.13E-14</b> | 0.17  | 0.42 | 6.90E-01 | -0.53 | 0.03 | <b>1.82E-56</b>  |
| 10 | 18448045  | rs11014267 | G  | A | 0.25 | 14 | HTN | -0.10 | 0.02 | 5.20E-08        | -0.07 | 0.01 | <b>1.71E-29</b>  | -0.05 | 0.01 | <b>2.27E-10</b> | -0.04 | 0.04 | 3.91E-01 | -0.06 | 0.00 | <b>2.19E-43</b>  |
| 11 | 16327586  | rs7127937  | C  | A | 0.17 | 15 | HTN | 0.10  | 0.02 | 5.97E-07        | 0.05  | 0.01 | <b>1.50E-13</b>  | 0.04  | 0.01 | 1.72E-04        | 0.08  | 0.06 | 1.54E-01 | 0.05  | 0.01 | <b>1.18E-20</b>  |
| 11 | 16331652  | rs34610248 | TA | T | 0.16 | 15 | DBP | 0.68  | 0.10 | <b>3.20E-12</b> | 0.28  | 0.03 | <b>5.67E-16</b>  | 0.22  | 0.04 | <b>5.78E-09</b> | 0.77  | 0.28 | 6.00E-03 | 0.28  | 0.02 | <b>8.75E-31</b>  |
| 11 | 16331652  | rs34610248 | TA | T | 0.16 | 15 | SBP | 1.08  | 0.17 | <b>1.12E-10</b> | 0.47  | 0.06 | <b>1.98E-14</b>  | 0.26  | 0.05 | 1.90E-07        | 1.01  | 0.48 | 3.65E-02 | 0.39  | 0.04 | <b>1.16E-24</b>  |
| 11 | 61510774  | rs751984   | T  | C | 0.16 | 16 | DBP | -0.52 | 0.10 | 3.19E-07        | -0.46 | 0.04 | <b>2.83E-27</b>  | -0.19 | 0.04 | 1.71E-05        | -0.50 | 0.21 | 1.67E-02 | -0.34 | 0.03 | <b>7.73E-33</b>  |
| 11 | 65799248  | rs557675   | T  | G | 0.43 | 17 | SBP | -0.63 | 0.13 | 5.98E-07        | -0.30 | 0.05 | <b>5.50E-10</b>  | -0.18 | 0.04 | 2.47E-06        | NA    | NA   | NA       | -0.25 | 0.03 | <b>1.81E-17</b>  |
| 12 | 20025130  | rs4762917  | C  | T | 0.69 | 18 | SBP | 0.81  | 0.14 | <b>1.10E-08</b> | 0.23  | 0.06 | 5.23E-05         | 0.11  | 0.04 | 1.07E-02        | 0.23  | 0.28 | 4.20E-01 | 0.19  | 0.03 | <b>1.11E-08</b>  |
| 12 | 20043911  | rs12829468 | A  | C | 0.59 | 18 | DBP | 0.47  | 0.08 | <b>1.65E-09</b> | 0.36  | 0.03 | <b>9.55E-33</b>  | 0.19  | 0.03 | <b>1.02E-10</b> | 0.17  | 0.17 | 3.10E-01 | 0.29  | 0.02 | <b>2.18E-45</b>  |
| 12 | 50149639  | rs10783336 | T  | C | 0.36 | 19 | SBP | -0.67 | 0.13 | 5.81E-07        | -0.41 | 0.05 | 3.05E-14         | -0.15 | 0.04 | 1.91E-04        | -0.44 | 0.28 | 1.19E-01 | -0.27 | 0.03 | <b>9.93E-18</b>  |
| 12 | 50217528  | rs10747572 | T  | A | 0.30 | 19 | HTN | -0.11 | 0.02 | <b>1.48E-10</b> | -0.03 | 0.01 | <b>4.93E-07</b>  | -0.02 | 0.01 | 8.67E-03        | -0.03 | 0.03 | 4.17E-01 | -0.03 | 0.00 | <b>8.97E-13</b>  |
| 12 | 89632746  | rs11105354 | A  | G | 0.16 | 20 | DBP | -0.60 | 0.10 | <b>1.29E-09</b> | -0.44 | 0.04 | <b>7.26E-34</b>  | -0.28 | 0.04 | <b>9.98E-14</b> | 0.06  | 0.25 | 8.13E-01 | -0.37 | 0.03 | <b>3.66E-50</b>  |
| 12 | 89632746  | rs11105354 | A  | G | 0.16 | 20 | SBP | -1.11 | 0.17 | <b>4.12E-11</b> | -1.06 | 0.06 | <b>9.13E-62</b>  | -0.53 | 0.05 | <b>1.31E-25</b> | -0.70 | 0.43 | 1.03E-01 | -0.75 | 0.04 | <b>3.04E-85</b>  |
| 12 | 89696964  | rs11105378 | C  | T | 0.16 | 20 | HTN | -0.11 | 0.02 | 4.35E-07        | -0.09 | 0.01 | <b>3.82E-32</b>  | -0.08 | 0.01 | <b>2.15E-17</b> | -0.08 | 0.05 | 1.20E-01 | -0.09 | 0.01 | <b>8.94E-54</b>  |
| 12 | 111466567 | rs4766578  | T  | A | 0.67 | 21 | DBP | -0.43 | 0.08 | 2.46E-07        | -0.59 | 0.03 | <b>5.58E-105</b> | -0.23 | 0.03 | <b>7.88E-15</b> | 0.07  | 0.25 | 7.76E-01 | -0.43 | 0.02 | <b>2.62E-106</b> |
| 12 | 114914926 | rs2384550  | G  | A | 0.32 | 22 | DBP | -0.44 | 0.08 | <b>1.04E-08</b> | -0.14 | 0.03 | 3.59E-07         | -0.06 | 0.03 | 3.28E-02        | 0.01  | 0.16 | 9.57E-01 | -0.12 | 0.02 | <b>2.11E-10</b>  |
| 12 | 114914926 | rs2384550  | G  | A | 0.32 | 22 | SBP | -0.68 | 0.13 | 2.20E-07        | -0.31 | 0.05 | <b>8.47E-10</b>  | -0.13 | 0.04 | 8.92E-04        | -0.25 | 0.28 | 3.70E-01 | -0.22 | 0.03 | <b>1.17E-13</b>  |
| 12 | 115118002 | rs1579381  | C  | G | 0.17 | 22 | HTN | -0.11 | 0.02 | 5.19E-07        | -0.04 | 0.01 | 7.98E-06         | -0.05 | 0.01 | 4.75E-06        | -0.08 | 0.04 | 2.33E-02 | -0.05 | 0.01 | <b>3.77E-15</b>  |
| 13 | 29563691  | rs7338758  | T  | C | 0.54 | 23 | DBP | -0.43 | 0.08 | 2.54E-07        | -0.19 | 0.03 | <b>1.30E-09</b>  | -0.13 | 0.03 | 1.06E-04        | -0.25 | 0.20 | 2.08E-01 | -0.19 | 0.02 | <b>1.10E-16</b>  |
| 17 | 1674897   | rs8073857  | A  | G | 0.30 | 24 | DBP | 0.43  | 0.08 | 2.84E-07        | 0.07  | 0.03 | 3.51E-02         | 0.11  | 0.03 | 1.10E-03        | 0.27  | 0.16 | 1.02E-01 | 0.12  | 0.02 | 1.68E-07         |

|    |                       |            |   |   |      |    |     |      |      |          |      |      |          |      |      |          |    |    |    |      |      |                 |
|----|-----------------------|------------|---|---|------|----|-----|------|------|----------|------|------|----------|------|------|----------|----|----|----|------|------|-----------------|
| 17 | 58775664 <sup>¶</sup> | rs12950119 | C | T | 0.24 | 25 | SBP | 0.81 | 0.15 | 5.71E-08 | 0.18 | 0.05 | 4.61E-04 | 0.23 | 0.04 | 1.32E-07 | NA | NA | NA | 0.24 | 0.03 | <b>2.46E-13</b> |
| 22 | 19999679              | rs7285377  | G | T | 0.21 | 26 | SBP | 0.78 | 0.15 | 2.68E-07 | 0.27 | 0.05 | 4.20E-07 | 0.17 | 0.05 | 1.22E-04 | NA | NA | NA | 0.24 | 0.03 | <b>6.49E-13</b> |

AAF, alternative allele frequency; Alt, alternative allele; Chr, chromosome; DBP, diastolic blood pressure (BP); HTN, hypertension; MVP, Million Veteran Program; NA, not available; Ref, reference allele; SBP, systolic BP; TOPMed, Trans-Omics for Precision Medicine; UKBB, UK Biobank.

\*An SNV at 2:7701061 was used as a proxy for 2:7653714 in UK Biobank ( $r^2=0.87$ ); †An SNV at 4:44156061 was used as a proxy for 4:44148142 in UK Biobank ( $r^2=1.0$ ). ‡An SNV at 7:86389044 was used as a proxy for 7:86352300 in MVP ( $r^2=0.83$ ); §An SNV at 2:35260112 was used as a proxy for 2:35187494 in MVP ( $r^2=0.98$ ). ¶An SNV at 4:76567636 was used as a proxy for 4:76564270 in UK Biobank ( $r^2=1.0$ ); ¶An SNV at 17:58783892 was used as a proxy for 17:58775664 in UK Biobank ( $r^2=0.99$ )

**Table S3.** Novel lead variants achieving  $P < 1E-06$  in single marker analyses of participants of African ancestry.

| Chr                                                 | Position (B38) | rsID         | Ref | Alt | AAF    | Locus (1MB) | Pheno | TOPMed |      |          | MVP   |      |          | REGARDS |      |          | Meta-Analysis |      |          | Identified in Multi-ancestry Analyses |
|-----------------------------------------------------|----------------|--------------|-----|-----|--------|-------------|-------|--------|------|----------|-------|------|----------|---------|------|----------|---------------|------|----------|---------------------------------------|
|                                                     |                |              |     |     |        |             |       | Beta   | SE   | P        | Beta  | SE   | P        | Beta    | SE   | P        | Beta          | SE   | P        |                                       |
| <i>Novel Loci</i>                                   |                |              |     |     |        |             |       |        |      |          |       |      |          |         |      |          |               |      |          |                                       |
| 2                                                   | 214211381      | rs574793711  | A   | T   | 0.002  | 1           | HTN   | -2.16  | 0.40 | 5.65E-08 | NA    | NA   | NA       | 0.25    | 0.48 | 6.07E-01 | -1.19         | 0.31 | 1.09E-04 | Y                                     |
| 2                                                   | 223786791      | rs111623545  | A   | G   | 0.30   | 2           | HTN   | -0.16  | 0.03 | 8.70E-07 | NA    | NA   | NA       | 0.02    | 0.04 | 6.09E-01 | -0.09         | 0.03 | 6.87E-04 | N                                     |
| 3                                                   | 511367         | rs751672976  | C   | T   | 0.0004 | 3           | DBP   | 18.28  | 3.60 | 3.74E-07 | NA    | NA   | NA       | NA      | NA   | NA       | NA            | NA   | NA       | N                                     |
| 3                                                   | 62420681       | rs144748865  | T   | C   | 0.02   | 4           | HTN   | -0.61  | 0.11 | 6.15E-08 | 0.02  | 0.06 | 7.61E-01 | 0.08    | 0.13 | 5.30E-01 | -0.10         | 0.05 | 5.03E-02 | Y                                     |
| 3                                                   | 129950737      | rs1033675304 | C   | T   | 0.0007 | 5           | HTN   | -2.66  | 0.54 | 9.80E-07 | NA    | NA   | NA       | NA      | NA   | NA       | NA            | NA   | NA       | N                                     |
| 3                                                   | 175462935      | rs184866027  | T   | G   | 0.0006 | 6           | DBP   | -15.51 | 3.07 | 4.40E-07 | NA    | NA   | NA       | NA      | NA   | NA       | NA            | NA   | NA       | N                                     |
| 4                                                   | 30091023       | rs80299918   | A   | C   | 0.002  | 7           | DBP   | 7.40   | 1.50 | 7.41E-07 | -0.41 | 2.13 | 8.49E-01 | 3.79    | 2.08 | 6.88E-02 | 4.56          | 1.06 | 1.54E-05 | N                                     |
| 4                                                   | 125543541      | rs530987100  | C   | G   | 0.001  | 8           | HTN   | -2.59  | 0.53 | 8.99E-07 | NA    | NA   | NA       | NA      | NA   | NA       | NA            | NA   | NA       | N                                     |
| 4                                                   | 160911462      | rs4525929    | T   | G   | 0.43   | 9           | HTN   | 0.15   | 0.03 | 4.12E-07 | 0.03  | 0.02 | 1.50E-01 | -0.10   | 0.04 | 3.21E-03 | 0.03          | 0.01 | 2.13E-02 | N                                     |
| 5                                                   | 30143572       | rs148958561  | C   | T   | 0.02   | 10          | HTN   | -0.54  | 0.11 | 8.57E-07 | 0.01  | 0.06 | 8.58E-01 | 0.13    | 0.12 | 2.96E-01 | -0.08         | 0.05 | 9.69E-02 | Y                                     |
| 6                                                   | 23864406       | rs187127066  | G   | A   | 0.0007 | 11          | SBP   | -23.58 | 4.74 | 6.60E-07 | -0.64 | 2.59 | 8.06E-01 | NA      | NA   | NA       | -5.91         | 2.27 | 9.32E-03 | N                                     |
| 7                                                   | 86369352       | rs891244454  | G   | C   | 0.0009 | 12          | DBP   | 12.27  | 2.41 | 3.65E-07 | NA    | NA   | NA       | NA      | NA   | NA       | NA            | NA   | NA       | Y                                     |
| 7                                                   | 103975616      | rs192963752  | G   | A   | 0.003  | 13          | HTN   | -1.50  | 0.30 | 6.80E-07 | NA    | NA   | NA       | 0.52    | 0.44 | 2.37E-01 | -0.85         | 0.25 | 6.42E-04 | N                                     |
| 7                                                   | 118992150      | rs191868039  | A   | G   | 0.002  | 14          | DBP   | -9.75  | 1.82 | 8.79E-08 | NA    | NA   | NA       | 1.98    | 2.51 | 4.29E-01 | -5.70         | 1.47 | 1.12E-04 | N                                     |
| 7                                                   | 142172215      | rs183009842  | C   | T   | 0.0009 | 15          | DBP   | -12.38 | 2.42 | 3.23E-07 | NA    | NA   | NA       | NA      | NA   | NA       | NA            | NA   | NA       | Y                                     |
| 8                                                   | 137338862      | rs569370277  | AT  | A   | 0.02   | 16          | DBP   | 2.55   | 0.51 | 6.93E-07 | 0.31  | 0.27 | 2.58E-01 | -0.33   | 0.60 | 5.88E-01 | 0.65          | 0.22 | 3.83E-03 | Y                                     |
| 10                                                  | 8686705        | rs144076023  | C   | T   | 0.001  | 17          | HTN   | -2.14  | 0.43 | 6.37E-07 | NA    | NA   | NA       | -0.36   | 0.50 | 4.77E-01 | -1.38         | 0.33 | 2.20E-05 | N                                     |
| 11                                                  | 127059794      | rs192393392  | G   | A   | 0.0006 | 18          | HTN   | -3.51  | 0.68 | 2.07E-07 | NA    | NA   | NA       | NA      | NA   | NA       | NA            | NA   | NA       | N                                     |
| 11                                                  | 133891929      | rs148370253  | C   | T   | 0.003  | 19          | DBP   | 6.87   | 1.37 | 5.37E-07 | NA    | NA   | NA       | -0.73   | 1.73 | 6.73E-01 | 3.94          | 1.07 | 2.44E-04 | N                                     |
| 12                                                  | 70961942       | rs56338775   | C   | T   | 0.19   | 20          | HTN   | -0.20  | 0.04 | 2.54E-07 | -0.02 | 0.02 | 3.95E-01 | -0.03   | 0.04 | 4.37E-01 | -0.05         | 0.02 | 1.16E-03 | N                                     |
| 12                                                  | 75745873       | rs12427271   | G   | A   | 0.14   | 21          | HTN   | 0.22   | 0.04 | 6.11E-07 | -0.02 | 0.02 | 3.27E-01 | 0.00    | 0.05 | 9.30E-01 | 0.03          | 0.02 | 1.52E-01 | N                                     |
| 13                                                  | 52274686*      | rs548695515  | G   | A   | 0.002  | 22          | DBP   | 8.52   | 1.64 | 2.07E-07 | -0.94 | 0.82 | 2.52E-01 | 1.79    | 1.92 | 3.52E-01 | 1.06          | 0.69 | 1.22E-01 | Y                                     |
| 14                                                  | 87679583       | rs150713962  | T   | A   | 0.002  | 23          | HTN   | -1.83  | 0.37 | 7.23E-07 | NA    | NA   | NA       | -0.22   | 0.46 | 6.27E-01 | -1.20         | 0.29 | 3.00E-05 | N                                     |
| 15                                                  | 97980174       | rs28562538   | C   | T   | 0.35   | 24          | SBP   | 1.30   | 0.26 | 8.80E-07 | 0.05  | 0.10 | 6.33E-01 | -0.10   | 0.31 | 7.58E-01 | 0.18          | 0.09 | 4.66E-02 | N                                     |
| 17                                                  | 15224226       | rs116416972  | G   | C   | 0.07   | 25          | DBP   | 1.47   | 0.30 | 9.08E-07 | 0.37  | 0.14 | 6.63E-03 | -0.41   | 0.35 | 2.46E-01 | 0.45          | 0.12 | 1.11E-04 | N                                     |
| 17                                                  | 51779485       | rs1526189    | C   | A   | 0.18   | 26          | DBP   | -1.06  | 0.20 | 8.96E-08 | NA    | NA   | NA       | -0.02   | 0.24 | 9.42E-01 | -0.63         | 0.15 | 3.51E-05 | N                                     |
| 20                                                  | 22968267       | rs148725323  | G   | A   | 0.0004 | 27          | HTN   | -4.10  | 0.82 | 5.34E-07 | 0.38  | 0.38 | 3.26E-01 | -0.06   | 0.52 | 9.12E-01 | -0.31         | 0.29 | 2.76E-01 | N                                     |
| <i>Novel Variants from Previously Reported Loci</i> |                |              |     |     |        |             |       |        |      |          |       |      |          |         |      |          |               |      |          |                                       |
| 1                                                   | 36845873       | rs966779519  | T   | C   | 0.001  | 1           | HTN   | -2.46  | 0.50 | 8.05E-07 | NA    | NA   | NA       | NA      | NA   | NA       | NA            | NA   | NA       | Y                                     |

|    |           |              |    |    |        |    |     |        |      |          |       |      |          |       |      |          |       |      |          |   |
|----|-----------|--------------|----|----|--------|----|-----|--------|------|----------|-------|------|----------|-------|------|----------|-------|------|----------|---|
| 1  | 150513095 | rs12031974   | T  | C  | 0.997  | 2  | SBP | 12.59  | 2.39 | 1.39E-07 | NA    | NA   | NA       | 4.68  | 3.31 | 1.58E-01 | 9.88  | 1.94 | 3.46E-07 | Y |
| 1  | 201168587 | rs12096352   | C  | T  | 0.03   | 3  | SBP | 3.90   | 0.76 | 2.44E-07 | 0.25  | 0.28 | 3.73E-01 | 0.15  | 0.89 | 8.67E-01 | 0.65  | 0.25 | 1.02E-02 | N |
| 2  | 37301487  | rs927593440  | G  | C  | 0.0004 | 4  | HTN | -3.66  | 0.74 | 6.80E-07 | NA    | NA   | NA       | NA    | NA   | NA       | NA    | NA   | NA       | N |
| 2  | 241963149 | rs567873302  | T  | C  | 0.001  | 5  | DBP | -11.26 | 2.27 | 7.32E-07 | NA    | NA   | NA       | NA    | NA   | NA       | NA    | NA   | NA       | N |
| 5  | 22756610  | rs539642938  | A  | G  | 0.002  | 6  | SBP | -13.04 | 2.63 | 7.36E-07 | NA    | NA   | NA       | 4.42  | 3.05 | 1.48E-01 | -5.60 | 1.99 | 5.01E-03 | N |
| 5  | 108627449 | rs943034543  | TA | T  | 0.85   | 7  | DBP | 1.03   | 0.21 | 8.08E-07 | NA    | NA   | NA       | -0.09 | 0.24 | 7.26E-01 | 0.55  | 0.16 | 4.47E-04 | N |
| 6  | 7715354   | rs1575291    | A  | G  | 0.86   | 8  | SBP | 1.89   | 0.37 | 3.43E-07 | 0.39  | 0.13 | 3.72E-03 | 0.49  | 0.42 | 2.47E-01 | 0.56  | 0.12 | 3.93E-06 | N |
| 6  | 95514748  | rs186696749  | G  | A  | 0.001  | 9  | DBP | -10.53 | 2.11 | 5.87E-07 | NA    | NA   | NA       | NA    | NA   | NA       | NA    | NA   | NA       | Y |
| 6  | 169255785 | rs149346837  | T  | C  | 0.006  | 10 | HTN | -1.00  | 0.19 | 1.54E-07 | NA    | NA   | NA       | 0.09  | 0.28 | 7.36E-01 | -0.65 | 0.16 | 3.39E-05 | Y |
| 7  | 18813701  | rs564948273  | C  | T  | 0.001  | 11 | HTN | -2.33  | 0.46 | 4.77E-07 | NA    | NA   | NA       | NA    | NA   | NA       | NA    | NA   | NA       | Y |
| 9  | 3353211   | rs542476106  | G  | T  | 0.0004 | 12 | HTN | -4.34  | 0.87 | 6.08E-07 | NA    | NA   | NA       | NA    | NA   | NA       | NA    | NA   | NA       | N |
| 10 | 125494847 | rs746384383  | C  | T  | 0.0004 | 13 | HTN | -4.02  | 0.82 | 9.92E-07 | NA    | NA   | NA       | NA    | NA   | NA       | NA    | NA   | NA       | N |
| 11 | 64639661  | rs528476366  | G  | A  | 0.0005 | 14 | SBP | 28.99  | 5.73 | 4.29E-07 | NA    | NA   | NA       | NA    | NA   | NA       | NA    | NA   | NA       | Y |
| 12 | 14176419  | rs557148731  | G  | A  | 0.006  | 15 | HTN | -0.95  | 0.19 | 3.27E-07 | 0.21  | 0.11 | 5.47E-02 | -0.22 | 0.21 | 2.97E-01 | -0.11 | 0.09 | 1.97E-01 | Y |
| 12 | 41910349  | rs11181238   | A  | G  | 0.52   | 16 | DBP | 0.74   | 0.15 | 5.87E-07 | 0.14  | 0.07 | 4.07E-02 | 0.16  | 0.17 | 3.64E-01 | 0.24  | 0.06 | 5.06E-05 | Y |
| 13 | 73178219  | rs9543252    | T  | C  | 0.24   | 17 | SBP | 1.45   | 0.29 | 8.58E-07 | -0.05 | 0.10 | 6.13E-01 | -0.24 | 0.35 | 4.94E-01 | 0.09  | 0.10 | 3.46E-01 | N |
| 14 | 22811645  | rs141077504  | T  | C  | 0.02   | 18 | SBP | -5.16  | 1.02 | 4.44E-07 | -0.03 | 0.37 | 9.34E-01 | 0.06  | 1.12 | 9.57E-01 | -0.55 | 0.33 | 9.22E-02 | Y |
| 14 | 23304280  | rs927479517  | A  | G  | 0.001  | 18 | HTN | -2.39  | 0.46 | 2.37E-07 | NA    | NA   | NA       | NA    | NA   | NA       | NA    | NA   | NA       | Y |
| 14 | 100851073 | rs112924824  | G  | A  | 0.0009 | 19 | HTN | -2.77  | 0.57 | 9.88E-07 | NA    | NA   | NA       | 0.81  | 0.65 | 2.10E-01 | -1.22 | 0.43 | 4.10E-03 | N |
| 16 | 68384745  | rs7200932    | C  | G  | 0.30   | 20 | SBP | -1.44  | 0.27 | 1.45E-07 | -0.14 | 0.10 | 1.84E-01 | -0.47 | 0.33 | 1.49E-01 | -0.31 | 0.09 | 7.49E-04 | Y |
| 16 | 83121771  | rs61113216   | A  | T  | 0.14   | 21 | HTN | -0.21  | 0.04 | 9.15E-07 | NA    | NA   | NA       | -0.09 | 0.05 | 6.43E-02 | -0.16 | 0.03 | 8.95E-07 | N |
| 16 | 86509951  | rs117935802  | G  | A  | 0.01   | 22 | DBP | -3.17  | 0.62 | 3.39E-07 | 0.34  | 0.28 | 2.36E-01 | 0.21  | 0.73 | 7.69E-01 | -0.22 | 0.24 | 3.74E-01 | N |
| 17 | 57156920  | rs12936510   | A  | G  | 0.92   | 23 | DBP | 1.42   | 0.29 | 8.26E-07 | 0.40  | 0.13 | 2.18E-03 | 0.14  | 0.33 | 6.87E-01 | 0.53  | 0.11 | 2.78E-06 | N |
| 18 | 46016131  | rs145337022  | A  | G  | 0.007  | 24 | DBP | -4.30  | 0.88 | 9.70E-07 | NA    | NA   | NA       | 0.49  | 1.06 | 6.43E-01 | -2.35 | 0.68 | 5.11E-04 | N |
| 19 | 17071566  | rs1026811864 | C  | T  | 0.0007 | 25 | DBP | 13.96  | 2.81 | 6.82E-07 | NA    | NA   | NA       | NA    | NA   | NA       | NA    | NA   | NA       | N |
| 19 | 33403836  | rs932829441  | T  | TG | 0.0004 | 26 | DBP | 18.21  | 3.64 | 5.75E-07 | NA    | NA   | NA       | NA    | NA   | NA       | NA    | NA   | NA       | Y |
| 19 | 39043568  | rs190692784  | C  | T  | 0.0005 | 27 | DBP | 16.24  | 3.12 | 1.96E-07 | NA    | NA   | NA       | NA    | NA   | NA       | NA    | NA   | NA       | N |
| 20 | 7306301   | rs6085986    | C  | A  | 0.62   | 28 | HTN | -0.16  | 0.03 | 5.20E-07 | -0.01 | 0.02 | 4.33E-01 | 0.01  | 0.04 | 8.84E-01 | -0.04 | 0.01 | 3.61E-03 | N |
| 20 | 8474254   | rs1035041462 | C  | G  | 0.0009 | 29 | DBP | -11.84 | 2.40 | 7.75E-07 | NA    | NA   | NA       | 0.90  | 2.24 | 6.87E-01 | -5.04 | 1.64 | 2.08E-03 | N |
| 20 | 10405335  | rs372944937  | A  | C  | 0.0004 | 30 | DBP | -17.75 | 3.47 | 3.11E-07 | NA    | NA   | NA       | NA    | NA   | NA       | NA    | NA   | NA       | Y |
| 20 | 49368981  | rs542440171  | C  | T  | 0.0005 | 31 | DBP | 16.44  | 3.33 | 7.81E-07 | NA    | NA   | NA       | NA    | NA   | NA       | NA    | NA   | NA       | N |
| 21 | 36123658  | rs192304372  | G  | A  | 0.002  | 32 | HTN | -1.95  | 0.37 | 1.87E-07 | NA    | NA   | NA       | 0.06  | 0.51 | 9.02E-01 | -1.25 | 0.30 | 3.57E-05 | Y |

AAF, alternative allele frequency; Alt, alternative allele; Chr, chromosome; DBP, diastolic blood pressure (BP); HTN, hypertension; MVP, Million Veteran Program; NA, not available; Pheno, phenotype; Ref, reference allele; SBP, systolic BP; TOPMed, Trans-Omics for Precision Medicine; UKBB, UK Biobank.

\*An SNV at 13:52412945 was used as a proxy for 13:52274686 in REGARDS ( $r^2=0.89$ ).

**Table S4.** Novel variants achieving  $P < 1E-06$  in single marker analyses of participants of Asian ancestry.

| Chr                                               | Position (B38) | rsID         | Ref  | Alt | AAF   | Locus (1MB) | Pheno | TOPMed |      |                 | MVP   |      |          | Meta-analysis |      |          | Identified in Multi-ancestry Analyses |
|---------------------------------------------------|----------------|--------------|------|-----|-------|-------------|-------|--------|------|-----------------|-------|------|----------|---------------|------|----------|---------------------------------------|
|                                                   |                |              |      |     |       |             |       | Beta   | SE   | P               | Beta  | SE   | P        | Beta          | SE   | P        |                                       |
| <i>Novel Loci</i>                                 |                |              |      |     |       |             |       |        |      |                 |       |      |          |               |      |          |                                       |
| 1                                                 | 20034935       | rs78952711   | G    | A   | 0.002 | 1           | DBP   | 15.06  | 3.00 | 4.94E-07        | NA    | NA   | NA       | NA            | NA   | NA       | N                                     |
| 1                                                 | 71055350       | rs1396751049 | A    | G   | 0.003 | 2           | SBP   | -21.96 | 4.25 | 2.43E-07        | NA    | NA   | NA       | NA            | NA   | NA       | Y                                     |
| 2                                                 | 7653714        | rs1462610506 | G    | A   | 0.002 | 3           | SBP   | -32.29 | 5.92 | <b>4.91E-08</b> | NA    | NA   | NA       | NA            | NA   | NA       | Y                                     |
| 5                                                 | 27033039       | rs183826057  | T    | C   | 0.004 | 4           | DBP   | 10.90  | 2.08 | 1.66E-07        | NA    | NA   | NA       | NA            | NA   | NA       | N                                     |
| 5                                                 | 105976684      | rs1465366879 | G    | C   | 0.002 | 5           | DBP   | 13.65  | 2.77 | 8.34E-07        | NA    | NA   | NA       | NA            | NA   | NA       | N                                     |
| 6                                                 | 77907910       | rs983348260  | C    | T   | 0.002 | 6           | DBP   | 15.23  | 2.87 | 1.15E-07        | NA    | NA   | NA       | NA            | NA   | NA       | N                                     |
| 7                                                 | 147057965      | rs59454844   | C    | A   | 0.02  | 7           | SBP   | -9.50  | 1.92 | 7.44E-07        | NA    | NA   | NA       | NA            | NA   | NA       | N                                     |
| 8                                                 | 3512422        | rs928576052  | T    | A   | 0.001 | 8           | HTN   | 3.93   | 0.78 | 4.07E-07        | NA    | NA   | NA       | NA            | NA   | NA       | N                                     |
| 9                                                 | 80991323       | rs373277444  | T    | C   | 0.002 | 9           | HTN   | -3.25  | 0.65 | 6.24E-07        | NA    | NA   | NA       | NA            | NA   | NA       | Y                                     |
| 13                                                | 18251702       | rs1369784734 | G    | A   | 0.003 | 10          | SBP   | 22.19  | 4.22 | 1.49E-07        | NA    | NA   | NA       | NA            | NA   | NA       | N                                     |
| 14                                                | 90802718       | rs57506024   | G    | T   | 0.002 | 11          | SBP   | 23.52  | 4.74 | 6.84E-07        | NA    | NA   | NA       | NA            | NA   | NA       | N                                     |
| 17                                                | 33851243       | rs377109     | C    | T   | 0.51  | 12          | HTN   | -0.30  | 0.06 | 7.60E-07        | NA    | NA   | NA       | NA            | NA   | NA       | N                                     |
| 20                                                | 45265366       | rs8115076    | A    | G   | 0.04  | 13          | SBP   | -5.85  | 1.17 | 5.21E-07        | NA    | NA   | NA       | NA            | NA   | NA       | Y                                     |
| <i>Novel Variants at Previously Reported Loci</i> |                |              |      |     |       |             |       |        |      |                 |       |      |          |               |      |          |                                       |
| 1                                                 | 42140873       | rs895048624  | C    | T   | 0.002 | 1           | DBP   | -15.41 | 3.03 | 3.59E-07        | NA    | NA   | NA       | NA            | NA   | NA       | N                                     |
| 1                                                 | 112064726      | rs550856031  | G    | C   | 0.004 | 2           | SBP   | -20.75 | 3.90 | 1.00E-07        | NA    | NA   | NA       | NA            | NA   | NA       | Y                                     |
| 4                                                 | 118304240      | rs372614646  | T    | C   | 0.002 | 3           | DBP   | -14.53 | 2.91 | 5.71E-07        | NA    | NA   | NA       | NA            | NA   | NA       | N                                     |
| 4                                                 | 124603162      | rs62324576   | A    | G   | 0.21  | 4           | SBP   | -2.95  | 0.57 | 2.29E-07        | NA    | NA   | NA       | NA            | NA   | NA       | N                                     |
| 5                                                 | 159688603      | rs1056949606 | G    | C   | 0.002 | 5           | DBP   | 16.11  | 3.02 | 9.50E-08        | NA    | NA   | NA       | NA            | NA   | NA       | Y                                     |
| 6                                                 | 78578616       | rs1771129668 | AAGG | A   | 0.002 | 6           | DBP   | 17.48  | 3.28 | 9.75E-08        | NA    | NA   | NA       | NA            | NA   | NA       | N                                     |
| 10                                                | 122776836      | rs869742     | A    | G   | 0.29  | 7           | SBP   | 2.59   | 0.53 | 8.83E-07        | -0.15 | 0.45 | 7.46E-01 | 1.01          | 0.34 | 3.14E-03 | N                                     |
| 11                                                | 117539708      | rs2509004    | G    | A   | 0.32  | 8           | HTN   | -0.34  | 0.06 | 7.55E-08        | NA    | NA   | NA       | NA            | NA   | NA       | N                                     |
| 12                                                | 12635001       | rs113998718  | G    | A   | 0.03  | 9           | HTN   | -0.93  | 0.18 | 2.81E-07        | NA    | NA   | NA       | NA            | NA   | NA       | Y                                     |
| 13                                                | 49466684       | rs148785348  | G    | A   | 0.008 | 10          | HTN   | 1.63   | 0.33 | 6.52E-07        | NA    | NA   | NA       | NA            | NA   | NA       | N                                     |
| 14                                                | 59506013       | rs376505264  | A    | T   | 0.002 | 11          | SBP   | -29.41 | 5.57 | 1.29E-07        | NA    | NA   | NA       | NA            | NA   | NA       | Y                                     |
| 15                                                | 26628999       | rs990895163  | C    | T   | 0.002 | 12          | SBP   | -27.38 | 5.44 | 4.96E-07        | NA    | NA   | NA       | NA            | NA   | NA       | Y                                     |
| 16                                                | 49743010       | rs375915281  | T    | G   | 0.004 | 13          | HTN   | 2.80   | 0.54 | 2.71E-07        | NA    | NA   | NA       | NA            | NA   | NA       | Y                                     |
| 19                                                | 5502949        | rs892681603  | A    | G   | 0.003 | 14          | DBP   | 12.99  | 2.64 | 9.04E-07        | NA    | NA   | NA       | NA            | NA   | NA       | N                                     |

---

AAF, alternative allele frequency; Alt, alternative allele; Chr, chromosome; DBP, diastolic blood pressure (BP); HTN, hypertension; MVP, Million Veteran Program; NA, not available; Pheno, phenotype; Ref, reference allele; SBP, systolic BP; TOPMed, Trans-Omics for Precision Medicine; UKBB, UK Biobank.

**Table S5.** Novel variants achieving  $P < 1E-06$  in single marker analyses of participants of European ancestry.

| Chr                                               | Position (B38) | rsID         | Ref  | Alt | AAF    | Loc | Phe | TOPMed |      |          | UKBB   |       |          | MVP   |      |          | REGARDS |      |          | Meta-analysis |      |          | Multi-ancestry Analyses |
|---------------------------------------------------|----------------|--------------|------|-----|--------|-----|-----|--------|------|----------|--------|-------|----------|-------|------|----------|---------|------|----------|---------------|------|----------|-------------------------|
|                                                   |                |              |      |     |        |     |     | Beta   | SE   | P        | Beta   | SE    | P        | Beta  | SE   | P        | Beta    | SE   | P        | Beta          | SE   | P        |                         |
| <i>Novel Loci</i>                                 |                |              |      |     |        |     |     |        |      |          |        |       |          |       |      |          |         |      |          |               |      |          |                         |
| 1                                                 | 62765101       | rs76269172   | C    | A   | 0.03   | 1   | DBP | 1.42   | 0.27 | 1.61E-07 | 0.03   | 0.07  | 6.74E-01 | 0.11  | 0.09 | 2.22E-01 | -1.77   | 1.23 | 1.52E-01 | 0.12          | 0.06 | 3.52E-02 | N                       |
| 2                                                 | 129699875      | rs540567720  | A    | G   | 0.0004 | 2   | DBP | -12.61 | 2.42 | 1.95E-07 | 0.15   | 0.53  | 7.72E-01 | NA    | NA   | NA       | NA      | NA   | NA       | -0.42         | 0.51 | 4.12E-01 | N                       |
| 2                                                 | 194267770      | rs1008983838 | T    | C   | 0.0003 | 3   | DBP | 12.95  | 2.64 | 9.69E-07 | -1.45  | 1.69  | 3.91E-01 | NA    | NA   | NA       | NA      | NA   | NA       | 2.73          | 1.42 | 5.53E-02 | N                       |
| 3                                                 | 25416500       | rs149809786  | C    | T   | 0.006  | 4   | SBP | 5.07   | 1.02 | 6.82E-07 | -0.29  | 0.29  | 3.24E-01 | -0.43 | 0.31 | 1.60E-01 | -4.75   | 4.27 | 2.67E-01 | -0.14         | 0.21 | 4.92E-01 | N                       |
| 4                                                 | 33007919       | rs76192272   | G    | A   | 0.0006 | 5   | SBP | -16.00 | 3.14 | 3.51E-07 | -1.61  | 1.30  | 2.14E-01 | NA    | NA   | NA       | -11.27  | 7.89 | 1.53E-01 | -3.87         | 1.18 | 1.07E-03 | Y                       |
| 4                                                 | 66198983       | rs561884114  | A    | C   | 0.0002 | 6   | HTN | 4.06   | 0.83 | 9.70E-07 | -0.38  | 0.82  | 6.44E-01 | NA    | NA   | NA       | NA      | NA   | NA       | 1.81          | 0.58 | 1.88E-03 | N                       |
| 4                                                 | 126021610      | rs566516927  | A    | C   | 0.001  | 7   | DBP | -6.94  | 1.38 | 4.51E-07 | -0.68  | 0.46  | 1.38E-01 | NA    | NA   | NA       | NA      | NA   | NA       | -1.31         | 0.43 | 2.66E-03 | N                       |
| 4                                                 | 154348736      | rs892714163  | T    | C   | 0.0005 | 8   | HTN | 2.32   | 0.47 | 9.05E-07 | 1.04   | 0.75  | 1.66E-01 | NA    | NA   | NA       | NA      | NA   | NA       | 1.95          | 0.40 | 9.86E-07 | N                       |
| 4                                                 | 183700478      | rs543591385  | T    | A   | 0.0008 | 9   | DBP | 7.91   | 1.59 | 6.87E-07 | 0.41   | 0.42  | 3.30E-01 | NA    | NA   | NA       | NA      | NA   | NA       | 0.91          | 0.41 | 2.64E-02 | N                       |
| 6                                                 | 86561152       | rs558889883  | G    | T   | 0.0009 | 10  | SBP | -12.56 | 2.56 | 9.53E-07 | -0.04  | 0.72  | 9.53E-01 | NA    | NA   | NA       | NA      | NA   | NA       | -0.95         | 0.69 | 1.69E-01 | N                       |
| 7                                                 | 120623195      | rs959927014  | A    | T   | 0.0002 | 11  | DBP | 14.11  | 2.86 | 8.20E-07 | 49.71  | 38.11 | 1.92E-01 | NA    | NA   | NA       | NA      | NA   | NA       | 14.31         | 2.85 | 5.32E-07 | Y                       |
| 7                                                 | 120907812      | rs578061109  | T    | A   | 0.0002 | 11  | HTN | 3.86   | 0.74 | 2.05E-07 | -0.20  | 0.26  | 4.45E-01 | NA    | NA   | NA       | NA      | NA   | NA       | 0.25          | 0.25 | 3.14E-01 | Y                       |
| 7                                                 | 143976251      | rs751854967  | T    | A   | 0.0003 | 12  | HTN | 3.06   | 0.62 | 7.46E-07 | 0.15   | 0.25  | 5.53E-01 | NA    | NA   | NA       | NA      | NA   | NA       | 0.56          | 0.23 | 1.60E-02 | N                       |
| 8                                                 | 8373964        | rs575133860  | C    | T   | 0.0002 | 13  | SBP | -25.24 | 5.14 | 9.19E-07 | 2.47   | 2.64  | 3.49E-01 | NA    | NA   | NA       | NA      | NA   | NA       | -3.32         | 2.35 | 1.58E-01 | Y                       |
| 9                                                 | 89734572       | rs958296179  | T    | G   | 0.0003 | 14  | DBP | -13.28 | 2.70 | 8.83E-07 | -0.46  | 1.07  | 6.68E-01 | NA    | NA   | NA       | NA      | NA   | NA       | -2.19         | 0.99 | 2.75E-02 | N                       |
| 10                                                | 111787758      | rs11816391   | C    | T   | 0.001  | 15  | HTN | 1.55   | 0.32 | 9.53E-07 | 0.13   | 0.13  | 3.28E-01 | 0.15  | 0.09 | 8.56E-02 | 1.42    | 1.10 | 1.99E-01 | 0.22          | 0.07 | 1.85E-03 | N                       |
| 11                                                | 60495718       | rs117337046  | A    | G   | 0.01   | 16  | DBP | 1.92   | 0.38 | 5.72E-07 | 0.00   | 0.11  | 9.74E-01 | 0.23  | 0.14 | 9.80E-02 | 0.08    | 1.77 | 9.64E-01 | 0.17          | 0.08 | 3.83E-02 | N                       |
| 12                                                | 83815309       | rs561552220  | ACT1 | A   | 0.0003 | 17  | SBP | -22.82 | 4.63 | 8.17E-07 | -16.17 | 12.26 | 1.87E-01 | NA    | NA   | NA       | NA      | NA   | NA       | -21.99        | 4.33 | 3.79E-07 | N                       |
| 13                                                | 38675796       | rs577492884  | CAT1 | A   | 0.003  | 18  | HTN | -0.99  | 0.19 | 1.94E-07 | 0.04   | 0.05  | 3.87E-01 | NA    | NA   | NA       | -1.07   | 1.24 | 3.89E-01 | -0.03         | 0.05 | 5.98E-01 | N                       |
| 13                                                | 101948434      | rs141819525  | T    | C   | 0.007  | 19  | DBP | 2.79   | 0.55 | 3.92E-07 | 0.24   | 0.18  | 1.84E-01 | 0.24  | 0.26 | 3.54E-01 | 1.10    | 2.32 | 6.34E-01 | 0.42          | 0.14 | 3.53E-03 | N                       |
| 14                                                | 57988146       | rs749207023  | C    | T   | 0.0003 | 20  | DBP | 12.42  | 2.52 | 8.36E-07 | 0.83   | 0.68  | 2.25E-01 | NA    | NA   | NA       | NA      | NA   | NA       | 1.62          | 0.66 | 1.40E-02 | Y                       |
| 15                                                | 28155119       | rs372510625  | T    | C   | 0.001  | 21  | SBP | 10.60  | 2.10 | 4.50E-07 | -0.80  | 0.67  | 2.38E-01 | NA    | NA   | NA       | NA      | NA   | NA       | 0.27          | 0.64 | 6.76E-01 | Y                       |
| 17                                                | 39044508       | rs748270054  | C    | T   | 0.0002 | 22  | SBP | -29.24 | 5.41 | 6.59E-08 | 3.53   | 1.58  | 2.54E-02 | NA    | NA   | NA       | NA      | NA   | NA       | 0.96          | 1.52 | 5.28E-01 | N                       |
| 19                                                | 54026925       | rs400400     | G    | A   | 0.14   | 23  | DBP | -0.68  | 0.13 | 3.28E-07 | -0.09  | 0.04  | 3.11E-02 | -0.03 | 0.05 | 5.78E-01 | -0.10   | 0.60 | 8.63E-01 | -0.09         | 0.03 | 1.97E-03 | N                       |
| 20                                                | 53496720       | rs528746565  | A    | G   | 0.0007 | 24  | HTN | 2.02   | 0.40 | 3.76E-07 | -0.12  | 0.11  | 2.75E-01 | NA    | NA   | NA       | NA      | NA   | NA       | 0.04          | 0.11 | 7.38E-01 | N                       |
| <i>Novel Variants at Previously Reported Loci</i> |                |              |      |     |        |     |     |        |      |          |        |       |          |       |      |          |         |      |          |               |      |          |                         |
| 1                                                 | 220559313      | rs1444461605 | G    | A   | 0.005  | 1   | DBP | 3.18   | 0.63 | 4.37E-07 | -0.01  | 0.20  | 9.48E-01 | 0.34  | 0.30 | 2.48E-01 | 3.74    | 3.61 | 2.99E-01 | 0.31          | 0.16 | 5.36E-02 | N                       |
| 1                                                 | 242546033      | rs12748137   | T    | G   | 0.66   | 2   | DBP | 0.48   | 0.10 | 5.85E-07 | 0.01   | 0.03  | 8.22E-01 | 0.02  | 0.03 | 5.91E-01 | -0.72   | 0.40 | 6.76E-02 | 0.03          | 0.02 | 1.32E-01 | N                       |
| 3                                                 | 185604045      | rs541586343  | C    | T   | 0.001  | 3   | DBP | -8.78  | 1.77 | 6.87E-07 | 1.80   | 1.47  | 2.21E-01 | NA    | NA   | NA       | NA      | NA   | NA       | -2.53         | 1.13 | 2.54E-02 | N                       |



|    |           |              |   |     |        |    |     |        |      |          |       |      |          |       |      |          |       |      |          |        |      |          |   |
|----|-----------|--------------|---|-----|--------|----|-----|--------|------|----------|-------|------|----------|-------|------|----------|-------|------|----------|--------|------|----------|---|
| 4  | 23985590  | rs536671665  | T | C   | 0.0005 | 4  | DBP | 10.09  | 2.05 | 8.33E-07 | 3.41  | 1.87 | 6.86E-02 | -0.82 | 1.84 | 6.58E-01 | NA    | NA   | NA       | 3.84   | 1.11 | 5.20E-04 | N |
| 4  | 23985590  | rs536671665  | T | C   | 0.0005 | 4  | HTN | 2.19   | 0.44 | 5.02E-07 | 0.14  | 0.37 | 7.11E-01 | NA    | NA   | NA       | NA    | NA   | NA       | 1.00   | 0.28 | 3.97E-04 | N |
| 4  | 102682904 | rs191838284  | G | C   | 0.01   | 5  | SBP | -3.45  | 0.68 | 3.96E-07 | -0.08 | 0.20 | 6.99E-01 | 0.47  | 0.39 | 2.33E-01 | -1.02 | 2.90 | 7.24E-01 | -0.20  | 0.17 | 2.63E-01 | N |
| 5  | 172024835 | rs779225390  | A | G   | 0.0002 | 6  | DBP | -14.73 | 2.86 | 2.72E-07 | 0.01  | 0.69 | 9.89E-01 | NA    | NA   | NA       | NA    | NA   | NA       | -0.81  | 0.67 | 2.32E-01 | Y |
| 5  | 172180433 | rs150791232  | C | T   | 0.001  | 6  | SBP | 14.15  | 2.83 | 5.57E-07 | 0.02  | 1.35 | 9.87E-01 | NA    | NA   | NA       | -9.01 | 8.07 | 2.64E-01 | 2.39   | 1.21 | 4.72E-02 | Y |
| 6  | 154480077 | rs114764916  | C | T   | 0.0002 | 7  | DBP | -14.94 | 3.05 | 9.46E-07 | 5.24  | 2.92 | 7.28E-02 | NA    | NA   | NA       | NA    | NA   | NA       | -4.42  | 2.11 | 3.61E-02 | N |
| 7  | 106438072 | rs1013536627 | G | A   | 0.0003 | 8  | DBP | 12.88  | 2.62 | 8.91E-07 | 0.32  | 0.62 | 6.12E-01 | NA    | NA   | NA       | NA    | NA   | NA       | 0.99   | 0.61 | 1.03E-01 | Y |
| 7  | 107735653 | rs147635708  | A | G   | 0.004  | 9  | HTN | -0.75  | 0.15 | 6.13E-07 | -0.14 | 0.05 | 9.41E-03 | NA    | NA   | NA       | 0.68  | 0.76 | 3.73E-01 | -0.20  | 0.05 | 6.04E-05 | N |
| 7  | 136718949 | rs556650389  | G | A   | 0.0004 | 10 | DBP | -11.01 | 2.17 | 3.97E-07 | 0.07  | 1.12 | 9.52E-01 | NA    | NA   | NA       | NA    | NA   | NA       | -2.26  | 1.00 | 2.32E-02 | N |
| 8  | 140001243 | rs578246850  | G | T   | 0.002  | 11 | SBP | 9.36   | 1.88 | 6.71E-07 | 0.66  | 0.62 | 2.86E-01 | NA    | NA   | NA       | -4.37 | 8.26 | 5.97E-01 | 1.49   | 0.59 | 1.15E-02 | Y |
| 8  | 144843317 | rs559045193  | T | C   | 0.004  | 12 | HTN | 0.81   | 0.16 | 6.28E-07 | NA    | NA   | NA       | NA    | NA   | NA       | NA    | NA   | NA       | NA     | NA   | NA       | N |
| 10 | 48254181  | rs562935500  | G | A   | 0.0004 | 13 | SBP | 18.60  | 3.75 | 7.19E-07 | 1.28  | 2.12 | 5.45E-01 | NA    | NA   | NA       | NA    | NA   | NA       | 5.47   | 1.85 | 3.03E-03 | N |
| 10 | 93065629  | rs118003307  | G | A   | 0.01   | 14 | DBP | 2.31   | 0.47 | 9.36E-07 | -0.15 | 0.18 | 3.83E-01 | 0.32  | 0.24 | 1.87E-01 | 0.33  | 2.89 | 9.10E-01 | 0.21   | 0.14 | 1.34E-01 | Y |
| 10 | 132389085 | rs183489999  | C | G   | 0.005  | 15 | HTN | 0.72   | 0.14 | 1.24E-07 | -0.02 | 0.04 | 6.25E-01 | NA    | NA   | NA       | 0.31  | 0.50 | 5.35E-01 | 0.03   | 0.03 | 3.57E-01 | N |
| 11 | 30758017  | rs759526273  | G | A   | 0.001  | 16 | SBP | -13.33 | 2.60 | 2.80E-07 | -9.19 | 6.62 | 1.65E-01 | NA    | NA   | NA       | NA    | NA   | NA       | -12.78 | 2.42 | 1.24E-07 | Y |
| 14 | 102002363 | rs539350051  | G | A   | 0.0002 | 17 | HTN | 4.15   | 0.83 | 6.44E-07 | -0.93 | 0.45 | 4.06E-02 | NA    | NA   | NA       | NA    | NA   | NA       | 0.23   | 0.40 | 5.58E-01 | N |
| 15 | 74602739  | rs900421386  | T | C   | 0.0002 | 18 | DBP | 14.93  | 2.85 | 1.69E-07 | -0.93 | 0.99 | 3.48E-01 | NA    | NA   | NA       | NA    | NA   | NA       | 0.77   | 0.93 | 4.09E-01 | N |
| 15 | 96338035  | rs34353956   | C | AAC | 0.38   | 19 | DBP | -0.47  | 0.09 | 5.14E-07 | NA    | NA   | NA       | -0.04 | 0.05 | 4.47E-01 | 0.06  | 0.53 | 9.16E-01 | -0.12  | 0.04 | 3.56E-03 | Y |
| 17 | 41088764  | rs184774589  | A | G   | 0.003  | 20 | HTN | 0.83   | 0.17 | 5.09E-07 | 0.01  | 0.04 | 7.32E-01 | 0.00  | 0.06 | 9.55E-01 | 0.15  | 0.58 | 8.01E-01 | 0.04   | 0.03 | 1.93E-01 | N |

*Previously Reported Loci*

|    |           |            |    |   |      |    |     |       |      |                 |       |      |                 |       |      |                 |       |      |          |       |      |                 |   |
|----|-----------|------------|----|---|------|----|-----|-------|------|-----------------|-------|------|-----------------|-------|------|-----------------|-------|------|----------|-------|------|-----------------|---|
| 1  | 10736809  | rs880315   | T  | C | 0.34 | 1  | SBP | 0.89  | 0.17 | 1.13E-07        | 0.57  | 0.05 | <b>1.74E-28</b> | 0.38  | 0.05 | <b>7.99E-17</b> | -0.41 | 0.69 | 5.47E-01 | 0.47  | 0.03 | <b>1.95E-46</b> | Y |
| 1  | 11798900  | rs45553335 | T  | C | 0.16 | 2  | DBP | -0.76 | 0.13 | <b>2.39E-09</b> | -0.63 | 0.04 | <b>5.08E-66</b> | -0.33 | 0.04 | <b>8.48E-14</b> | -1.40 | 0.50 | 5.48E-03 | -0.52 | 0.03 | <b>3.50E-80</b> | Y |
| 3  | 169405049 | rs17485157 | G  | A | 0.23 | 3  | SBP | -1.16 | 0.19 | <b>7.96E-10</b> | -0.45 | 0.06 | <b>1.68E-15</b> | -0.10 | 0.05 | 4.33E-02        | -2.98 | 0.78 | 1.29E-04 | -0.30 | 0.04 | <b>4.44E-16</b> | Y |
| 3  | 169405049 | rs17485157 | G  | A | 0.23 | 3  | DBP | -0.63 | 0.11 | <b>7.28E-09</b> | -0.30 | 0.03 | <b>2.50E-20</b> | -0.13 | 0.04 | 7.34E-04        | -1.09 | 0.46 | 1.68E-02 | -0.25 | 0.02 | <b>2.30E-25</b> | Y |
| 4  | 102267552 | rs13107325 | C  | T | 0.07 | 4  | DBP | -1.07 | 0.18 | <b>1.36E-09</b> | -0.80 | 0.05 | <b>1.27E-53</b> | -0.46 | 0.06 | <b>6.93E-15</b> | 0.21  | 0.73 | 7.75E-01 | -0.67 | 0.04 | <b>2.24E-69</b> | Y |
| 5  | 128525056 | rs6595835  | C  | T | 0.29 | 5  | SBP | 0.88  | 0.17 | 4.09E-07        | 0.46  | 0.05 | <b>6.57E-19</b> | 0.30  | 0.05 | <b>2.35E-10</b> | 2.02  | 0.72 | 4.89E-03 | 0.40  | 0.03 | <b>4.20E-31</b> | N |
| 6  | 43388113  | rs2396004  | A  | G | 0.56 | 6  | SBP | -0.94 | 0.16 | <b>4.43E-09</b> | -0.30 | 0.05 | <b>9.03E-10</b> | -0.31 | 0.04 | <b>3.48E-12</b> | -1.06 | 0.66 | 1.10E-01 | -0.33 | 0.03 | <b>5.93E-25</b> | Y |
| 6  | 43440728  | rs2794264  | C  | G | 0.77 | 6  | HTN | -0.13 | 0.02 | 5.02E-08        | -0.02 | 0.01 | 0.000228        | -0.02 | 0.01 | 7.38E-02        | 0.05  | 0.09 | 5.85E-01 | -0.03 | 0.01 | 3.83E-07        | Y |
| 8  | 11434264  | rs34443092 | C  | G | 0.22 | 7  | SBP | -1.00 | 0.19 | 2.04E-07        | -0.27 | 0.06 | 7.21E-06        | -0.16 | 0.05 | 3.56E-03        | -0.14 | 0.78 | 8.59E-01 | -0.24 | 0.04 | <b>8.87E-10</b> | Y |
| 10 | 18448045  | rs11014267 | G  | A | 0.34 | 8  | HTN | -0.11 | 0.02 | 1.46E-07        | -0.07 | 0.01 | <b>1.71E-29</b> | -0.05 | 0.01 | <b>7.14E-11</b> | -0.09 | 0.08 | 2.47E-01 | -0.06 | 0.00 | <b>1.39E-43</b> | Y |
| 11 | 16327586  | rs7127937  | C  | A | 0.21 | 9  | SBP | 1.04  | 0.19 | 7.93E-08        | 0.49  | 0.06 | <b>5.00E-17</b> | 0.29  | 0.06 | 3.27E-07        | 1.21  | 0.82 | 1.40E-01 | 0.41  | 0.04 | <b>1.69E-25</b> | Y |
| 11 | 16331652  | NA         | TA | T | 0.19 | 9  | DBP | 0.70  | 0.12 | <b>1.64E-09</b> | 0.28  | 0.03 | <b>5.67E-16</b> | 0.25  | 0.04 | <b>7.76E-09</b> | 0.98  | 0.50 | 4.99E-02 | 0.29  | 0.03 | <b>1.13E-28</b> | Y |
| 12 | 20025130  | rs4762917  | C  | T | 0.77 | 10 | DBP | 0.60  | 0.11 | <b>3.74E-08</b> | 0.33  | 0.03 | <b>1.91E-25</b> | 0.12  | 0.04 | 1.44E-03        | -0.15 | 0.45 | 7.41E-01 | 0.26  | 0.02 | <b>5.11E-28</b> | Y |
| 12 | 50167576  | rs73106145 | G  | C | 0.25 | 11 | HTN | -0.12 | 0.02 | 6.95E-08        | -0.04 | 0.01 | <b>2.61E-09</b> | -0.03 | 0.01 | 8.47E-05        | -0.03 | 0.09 | 7.60E-01 | -0.04 | 0.01 | <b>4.44E-16</b> | Y |

|    |           |           |   |   |      |    |     |       |      |                 |       |      |                 |       |      |                 |       |      |          |       |      |                 |   |
|----|-----------|-----------|---|---|------|----|-----|-------|------|-----------------|-------|------|-----------------|-------|------|-----------------|-------|------|----------|-------|------|-----------------|---|
| 12 | 89619312  | rs2681492 | T | C | 0.17 | 12 | SBP | -1.10 | 0.21 | 2.30E-07        | -1.06 | 0.06 | <b>1.28E-62</b> | -0.48 | 0.06 | <b>3.46E-17</b> | -3.16 | 0.90 | 4.64E-04 | -0.76 | 0.04 | <b>1.73E-74</b> | Y |
| 12 | 111591487 | rs7953810 | T | C | 0.79 | 13 | DBP | 0.57  | 0.11 | 3.74E-07        | 0.42  | 0.03 | <b>1.82E-37</b> | NA    | NA   | NA              | -0.43 | 0.47 | 3.60E-01 | 0.43  | 0.03 | <b>3.43E-42</b> | Y |
| 12 | 114914926 | rs2384550 | G | A | 0.36 | 14 | DBP | -0.55 | 0.10 | <b>1.18E-08</b> | -0.14 | 0.03 | 3.59E-07        | -0.08 | 0.03 | 1.73E-02        | -0.39 | 0.39 | 3.16E-01 | -0.14 | 0.02 | <b>4.40E-11</b> | Y |
| 13 | 29563691  | rs7338758 | T | C | 0.76 | 15 | DBP | -0.53 | 0.11 | 8.93E-07        | -0.20 | 0.03 | <b>1.00E-09</b> | -0.14 | 0.04 | 1.06E-04        | -0.18 | 0.46 | 6.95E-01 | -0.19 | 0.02 | <b>6.66E-16</b> | Y |
| 17 | 64286156  | rs8072421 | G | A | 0.79 | 16 | HTN | 0.13  | 0.02 | 3.37E-07        | 0.02  | 0.01 | 0.00802         | 0.03  | 0.01 | 2.61E-02        | 0.22  | 0.11 | 3.75E-02 | 0.03  | 0.01 | 3.80E-06        | N |

AAF, alternative allele frequency; Alt, alternative allele; Chr, chromosome; DBP, diastolic blood pressure (BP); HTN, hypertension; MVP, Million Veteran Program; NA, not available; Pheno, phenotype; Ref, reference allele; SBP, systolic BP; TOPMed, Trans-Omics for Precision Medicine; UKBB, UK Biobank.

**Table S6.** Novel lead variants achieving  $P < 1E-06$  in single marker analyses of participants of Hispanic ancestry.

| Chr                                               | Position (B38) | rsID         | Ref  | Alt | AAF   | Locus (1MB) | Pheno | TOPMed |      |                 | MVP   |      |          | Meta-analysis |      |          | Identified in Multi-ancestry Analyses |
|---------------------------------------------------|----------------|--------------|------|-----|-------|-------------|-------|--------|------|-----------------|-------|------|----------|---------------|------|----------|---------------------------------------|
|                                                   |                |              |      |     |       |             |       | Beta   | SE   | P               | Beta  | SE   | P        | Beta          | SE   | P        |                                       |
| <i>Novel Loci</i>                                 |                |              |      |     |       |             |       |        |      |                 |       |      |          |               |      |          |                                       |
| 1                                                 | 171349448      | rs12121703   | C    | A   | 0.005 | 1           | HTN   | -2.02  | 0.39 | 2.12E-07        | 0.27  | 0.24 | 2.58E-01 | -0.36         | 0.20 | 8.02E-02 | N                                     |
| 2                                                 | 233398463      | rs142982073  | T    | A   | 0.003 | 2           | SBP   | 23.22  | 4.18 | <b>2.74E-08</b> | NA    | NA   | NA       | NA            | NA   | NA       | N                                     |
| 3                                                 | 1251324        | rs73002355   | C    | A   | 0.27  | 3           | HTN   | 0.29   | 0.06 | 9.91E-07        | 0.00  | 0.03 | 9.66E-01 | 0.07          | 0.03 | 1.75E-02 | N                                     |
| 3                                                 | 108837985      | rs1374819    | G    | A   | 0.99  | 4           | HTN   | 1.16   | 0.22 | 8.32E-08        | 0.11  | 0.39 | 7.74E-01 | 0.91          | 0.19 | 1.51E-06 | N                                     |
| 4                                                 | 139434324      | NA           | TTTG | T   | 0.005 | 5           | DBP   | -10.25 | 1.91 | 8.03E-08        | NA    | NA   | NA       | NA            | NA   | NA       | N                                     |
| 4                                                 | 141555930      | rs150742805  | G    | C   | 0.009 | 6           | SBP   | 12.96  | 2.64 | 8.91E-07        | 2.18  | 0.96 | 2.24E-02 | 3.44          | 0.90 | 1.32E-04 | N                                     |
| 5                                                 | 85131700       | rs13161070   | A    | G   | 0.27  | 7           | HTN   | -0.29  | 0.06 | 9.30E-07        | 0.01  | 0.03 | 6.88E-01 | -0.06         | 0.03 | 4.75E-02 | N                                     |
| 7                                                 | 82718668       | rs114415195  | A    | G   | 0.004 | 8           | DBP   | 11.09  | 2.26 | 9.55E-07        | 1.43  | 1.39 | 3.04E-01 | 4.07          | 1.18 | 5.87E-04 | N                                     |
| 9                                                 | 7789671        | rs73640528   | T    | G   | 0.01  | 9           | SBP   | -11.99 | 2.41 | 6.39E-07        | NA    | NA   | NA       | NA            | NA   | NA       | N                                     |
| 9                                                 | 101019274      | rs1829803343 | CT   | C   | 0.004 | 10          | SBP   | 19.84  | 3.89 | 3.43E-07        | NA    | NA   | NA       | NA            | NA   | NA       | Y                                     |
| 10                                                | 52552315       | rs140873521  | C    | T   | 0.002 | 11          | SBP   | -26.39 | 5.11 | 2.43E-07        | 1.95  | 2.10 | 3.54E-01 | -2.15         | 1.94 | 2.69E-01 | N                                     |
| 10                                                | 65663386       | rs150860430  | T    | C   | 0.005 | 12          | DBP   | 10.52  | 1.99 | 1.29E-07        | -1.05 | 1.07 | 3.28E-01 | 1.54          | 0.94 | 1.02E-01 | N                                     |
| 11                                                | 84308504       | rs7130515    | C    | T   | 0.03  | 13          | DBP   | -4.17  | 0.81 | 2.32E-07        | -0.12 | 0.46 | 8.03E-01 | -1.12         | 0.40 | 5.20E-03 | N                                     |
| 13                                                | 104854218      | rs116125587  | C    | G   | 0.007 | 14          | DBP   | 7.83   | 1.60 | 9.55E-07        | NA    | NA   | NA       | NA            | NA   | NA       | N                                     |
| 17                                                | 50585349       | rs73340234   | G    | A   | 0.10  | 15          | DBP   | 2.51   | 0.47 | 9.62E-08        | NA    | NA   | NA       | NA            | NA   | NA       | N                                     |
| 17                                                | 54148586       | rs141053160  | A    | T   | 0.009 | 16          | DBP   | 7.08   | 1.42 | 6.69E-07        | -0.71 | 0.90 | 4.30E-01 | 1.52          | 0.76 | 4.61E-02 | N                                     |
| 20                                                | 53813083       | rs140277791  | G    | A   | 0.008 | 17          | SBP   | -13.10 | 2.61 | 5.38E-07        | 2.04  | 2.04 | 3.16E-01 | -3.67         | 1.61 | 2.21E-02 | N                                     |
| 22                                                | 17419355       | rs5992045    | A    | G   | 0.04  | 18          | SBP   | -6.16  | 1.26 | 9.58E-07        | -0.78 | 0.50 | 1.22E-01 | -1.52         | 0.47 | 1.12E-03 | N                                     |
| <i>Novel Variants at Previously Reported Loci</i> |                |              |      |     |       |             |       |        |      |                 |       |      |          |               |      |          |                                       |
| 1                                                 | 152720669      | rs146580854  | C    | T   | 0.004 | 1           | SBP   | -21.44 | 4.04 | 1.09E-07        | -0.18 | 1.82 | 9.23E-01 | -3.76         | 1.66 | 2.33E-02 | N                                     |
| 2                                                 | 187635130      | rs114208581  | G    | T   | 0.007 | 2           | SBP   | 15.18  | 2.91 | 1.80E-07        | -0.95 | 0.89 | 2.83E-01 | 0.42          | 0.85 | 6.20E-01 | N                                     |
| 4                                                 | 53651248       | rs6819831    | T    | C   | 0.05  | 3           | SBP   | 6.01   | 1.17 | 2.62E-07        | -0.72 | 0.46 | 1.17E-01 | 0.18          | 0.43 | 6.74E-01 | N                                     |
| 5                                                 | 64432600       | rs114242941  | T    | G   | 0.02  | 4           | DBP   | 5.56   | 0.99 | <b>2.13E-08</b> | -0.10 | 0.60 | 8.66E-01 | 1.41          | 0.51 | 5.96E-03 | N                                     |
| 6                                                 | 71349009       | rs137992085  | G    | A   | 0.008 | 5           | SBP   | 14.35  | 2.77 | 2.22E-07        | 0.32  | 1.08 | 7.71E-01 | 2.17          | 1.01 | 3.11E-02 | N                                     |
| 6                                                 | 169345812      | rs6907101    | A    | C   | 0.04  | 6           | HTN   | -0.69  | 0.14 | 5.19E-07        | 0.04  | 0.13 | 7.71E-01 | -0.30         | 0.09 | 1.46E-03 | Y                                     |
| 7                                                 | 42471062       | rs28813987   | A    | G   | 0.11  | 7           | SBP   | 3.95   | 0.77 | 3.16E-07        | 0.32  | 0.21 | 1.27E-01 | 0.56          | 0.20 | 5.06E-03 | N                                     |
| 8                                                 | 37850706       | NA           | GGAG | C   | 0.03  | 8           | SBP   | -7.55  | 1.45 | 1.97E-07        | 1.01  | 0.61 | 9.98E-02 | -0.28         | 0.56 | 6.15E-01 | N                                     |
| 9                                                 | 21623989       | rs111769602  | T    | A   | 0.007 | 9           | SBP   | 15.06  | 2.92 | 2.49E-07        | NA    | NA   | NA       | NA            | NA   | NA       | N                                     |
| 10                                                | 89557596       | rs577309319  | A    | G   | 0.002 | 10          | HTN   | -3.79  | 0.74 | 3.37E-07        | NA    | NA   | NA       | NA            | NA   | NA       | N                                     |

|                          |           |             |   |    |         |    |     |        |      |                 |       |      |          |       |      |          |   |
|--------------------------|-----------|-------------|---|----|---------|----|-----|--------|------|-----------------|-------|------|----------|-------|------|----------|---|
| 10                       | 132528625 | rs74569766  | T | C  | 0.03    | 11 | DBP | 3.88   | 0.79 | 8.35E-07        | 0.24  | 0.45 | 6.05E-01 | 1.15  | 0.39 | 3.58E-03 | N |
| 11                       | 111061016 | rs185000995 | C | A  | 0.002   | 12 | SBP | 28.84  | 5.67 | 3.62E-07        | NA    | NA   | NA       | NA    | NA   | NA       | N |
| 12                       | 24684920  | rs60519245  | G | A  | 0.008   | 13 | SBP | -13.27 | 2.67 | 6.75E-07        | 0.68  | 1.45 | 6.40E-01 | -2.51 | 1.28 | 4.95E-02 | N |
| 13                       | 50789167  | rs17069393  | T | C  | 0.17    | 14 | SBP | -3.31  | 0.65 | 2.89E-07        | -0.11 | 0.18 | 5.36E-01 | -0.36 | 0.18 | 4.50E-02 | N |
| 14                       | 51118919  | rs10149439  | A | G  | 0.39    | 15 | DBP | -1.42  | 0.28 | 2.59E-07        | 0.04  | 0.11 | 7.35E-01 | -0.16 | 0.10 | 1.13E-01 | N |
| 17                       | 42149720  | rs78680046  | G | A  | 0.01    | 16 | DBP | 5.97   | 1.21 | 7.78E-07        | NA    | NA   | NA       | NA    | NA   | NA       | N |
| 20                       | 17111142  | rs76363605  | T | C  | 0.008   | 17 | SBP | 14.10  | 2.74 | 2.63E-07        | 0.79  | 1.36 | 5.61E-01 | 3.41  | 1.22 | 5.02E-03 | N |
| 21                       | 46020594  | rs141563513 | G | A  | 0.007   | 18 | DBP | -7.77  | 1.52 | 3.45E-07        | NA    | NA   | NA       | NA    | NA   | NA       | N |
| 22                       | 39571716  | rs9623018   | A | T  | 0.004   | 19 | DBP | 10.17  | 2.06 | 7.61E-07        | -0.93 | 1.15 | 4.18E-01 | 1.73  | 1.01 | 8.62E-02 | N |
| Previously Reported Loci |           |             |   |    |         |    |     |        |      |                 |       |      |          |       |      |          |   |
| 10                       | 132539576 | rs34282942  | G | GT | 0.27098 | 1  | DBP | 1.70   | 0.31 | <b>3.69E-08</b> | -0.04 | 0.13 | 7.29E-01 | 0.21  | 0.12 | 7.13E-02 | N |

AAF, alternative allele frequency; Alt, alternative allele; Chr, chromosome; DBP, diastolic blood pressure (BP); HTN, hypertension; MVP, Million Veteran Program; NA, not available; Pheno, phenotype; Ref, reference allele; SBP, systolic BP; TOPMed, Trans-Omics for Precision Medicine; UKBB, UK Biobank.

**Table S7.** Novel variants achieving  $P < 1E-06$  in single marker analyses of participants of Samoan ancestry.

| Chr                                             | Position (B38) | rsID        | Ref | Alt | AAF   | Locus (1MB) | Pheno | TOPMed |      |          | Identified in Multi-ancestry Analyses |
|-------------------------------------------------|----------------|-------------|-----|-----|-------|-------------|-------|--------|------|----------|---------------------------------------|
|                                                 |                |             |     |     |       |             |       | Beta   | SE   | P        |                                       |
| <i>Novel Loci</i>                               |                |             |     |     |       |             |       |        |      |          |                                       |
| 1                                               | 160906765      | rs889484496 | C   | T   | 0.008 | 1           | HTN   | 2.91   | 0.54 | 5.83E-08 | Y                                     |
| 1                                               | 188546014      | rs1586059   | C   | T   | 0.35  | 2           | HTN   | 0.49   | 0.10 | 6.28E-07 | N                                     |
| 7                                               | 21277699       | rs141639223 | C   | T   | 0.08  | 3           | SBP   | -6.97  | 1.42 | 9.74E-07 | N                                     |
| 20                                              | 56748383       | rs375606398 | G   | A   | 0.05  | 4           | HTN   | 1.03   | 0.21 | 8.73E-07 | Y                                     |
| <i>Novel Loci from Previously Reported Loci</i> |                |             |     |     |       |             |       |        |      |          |                                       |
| 18                                              | 50631599       | rs8091238   | G   | C   | 0.94  | 1           | HTN   | -1.06  | 0.2  | 2.11E-07 | N                                     |

AAF, alternative allele frequency; Alt, alternative allele; Chr, chromosome; DBP, diastolic blood pressure (BP); HTN, hypertension; MVP, Million Veteran Program; NA, not available; Pheno, phenotype; Ref, reference allele; SBP, systolic

**Table S8.** Genes and chromosomal regions with SMMAT-E  $P < 1E-4$  in aggregate rare variant analyses of the multi-ancestry sample.

| Aggregate Unit                                                                                           | Phe | TOPMed                    |                     |                    | UK Biobank WES Data       |                     |                    | Meta-analysis<br>P-value |
|----------------------------------------------------------------------------------------------------------|-----|---------------------------|---------------------|--------------------|---------------------------|---------------------|--------------------|--------------------------|
|                                                                                                          |     | Rare Variant<br>Sites (N) | Rare Alleles<br>(N) | SMMAT-E<br>P-value | Rare Variant<br>Sites (N) | Rare Alleles<br>(N) | SMMAT-E<br>P-value |                          |
| <i>Gene-based analysis (high confidence loss of function variants only)</i>                              |     |                           |                     |                    |                           |                     |                    |                          |
| NAPEPLD<br>(Chr7:103099576-103149560)                                                                    | HTN | 1                         | 5                   | 4.31E-05           | 0                         | 0                   | NA                 | NA                       |
| GABRB3<br>(Chr15:26543546-26773763)                                                                      | SBP | 3                         | 26                  | 2.67E-06           | 1                         | 2                   | 1.29E-01           | 5.42E-06                 |
| <i>Gene-based analysis (Loss-of-function variants, missense variants, and protein altering indels)</i>   |     |                           |                     |                    |                           |                     |                    |                          |
| DNAJB13<br>(Chr11:73950321-73970287)                                                                     | DBP | 16                        | 451                 | 2.91E-05           | 8                         | 1,033               | 2.58E-02           | <b>1.13E-05</b>          |
| <i>Gene-based analysis (Enhancer, promoter, and exonic variants with predicted functional relevance)</i> |     |                           |                     |                    |                           |                     |                    |                          |
| RP13-514E23.1<br>(Chr4:86012296-86013874)                                                                | HTN | 4                         | 114                 | 8.97E-05           | 8                         | 145                 | 2.97E-01           | 3.07E-04                 |
| SYT7<br>(Chr11:61513714-61588404)                                                                        | SBP | 92                        | 3282                | 8.86E-05           | 35                        | 1,485               | 1.82E-01           | 1.94E-04                 |
| DNAJB13<br>(Chr11:73950321-73970287)                                                                     | DBP | 30                        | 874                 | 7.14E-05           | 15                        | 1,474               | 6.01E-02           | <b>5.29E-05</b>          |
| RASAL1<br>(Chr12:113096515-113136248)                                                                    | SBP | 98                        | 1541                | 4.73E-05           | 58                        | 3,204               | 1.43E-01           | 8.74E-05                 |
| SMARCD1<br>(Chr12:50085236-50100707)                                                                     | HTN | 65                        | 1738                | 4.95E-05           | 20                        | 2,024               | 5.10E-01           | 2.92E-04                 |
| RP11-297M9.1<br>(Chr16:9666885-9676843)                                                                  | DBP | 1                         | 15                  | 4.83E-05           | 0                         | 0                   | NA                 | NA                       |
| ZNF431<br>(Chr19:21142009-21196053)                                                                      | SBP | 31                        | 2073                | 8.40E-05           | 0                         | 0                   | NA                 | NA                       |
| <i>Sliding window analysis</i>                                                                           |     |                           |                     |                    |                           |                     |                    |                          |
| Chr1:227060001-227080000                                                                                 | DBP | 17                        | 178                 | 4.93E-05           | NA                        | NA                  | NA                 | NA                       |
| Chr2:196990001-197010000                                                                                 | DBP | 34                        | 923                 | 8.12E-05           | NA                        | NA                  | NA                 | NA                       |
| Chr2:211720001-211740000                                                                                 | HTN | 5                         | 122                 | 8.15E-06           | NA                        | NA                  | NA                 | NA                       |

|                          |     |    |      |          |    |    |    |    |
|--------------------------|-----|----|------|----------|----|----|----|----|
| Chr2:137760001-137780000 | SBP | 7  | 609  | 4.98E-05 | NA | NA | NA | NA |
| Chr2:137770001-137790000 | SBP | 3  | 291  | 2.75E-05 | NA | NA | NA | NA |
| Chr3:60900001-60920000   | DBP | 17 | 539  | 4.14E-05 | NA | NA | NA | NA |
| Chr3:60910001-60930000   | DBP | 20 | 562  | 8.32E-05 | NA | NA | NA | NA |
| Chr3:130510001-130530000 | DBP | 10 | 1322 | 3.69E-05 | NA | NA | NA | NA |
| Chr3:130520001-130540000 | DBP | 8  | 1315 | 3.37E-05 | NA | NA | NA | NA |
| Chr3:179510001-179530000 | DBP | 6  | 455  | 6.44E-05 | NA | NA | NA | NA |
| Chr3:100320001-100340000 | HTN | 29 | 429  | 4.32E-06 | NA | NA | NA | NA |
| Chr3:121910001-121930000 | HTN | 26 | 417  | 2.33E-05 | NA | NA | NA | NA |
| Chr4:44130001-44150000   | DBP | 13 | 749  | 1.47E-05 | NA | NA | NA | NA |
| Chr4:44140001-44160000   | DBP | 13 | 833  | 1.50E-05 | NA | NA | NA | NA |
| Chr4:124730001-124750000 | DBP | 2  | 464  | 2.62E-05 | NA | NA | NA | NA |
| Chr4:124740001-124760000 | DBP | 3  | 467  | 1.77E-05 | NA | NA | NA | NA |
| Chr4:154050001-154070000 | DBP | 2  | 8    | 6.22E-05 | NA | NA | NA | NA |
| Chr4:75300001-75320000   | HTN | 1  | 3    | 1.60E-05 | NA | NA | NA | NA |
| Chr4:98480001-98500000   | HTN | 4  | 18   | 3.55E-05 | NA | NA | NA | NA |
| Chr4:38240001-38260000   | SBP | 2  | 34   | 6.97E-05 | NA | NA | NA | NA |
| Chr4:47020001-47040000   | SBP | 15 | 577  | 2.28E-05 | NA | NA | NA | NA |
| Chr4:47030001-47050000   | SBP | 16 | 581  | 4.43E-05 | NA | NA | NA | NA |
| Chr5:57890001-57910000   | DBP | 5  | 16   | 1.93E-06 | NA | NA | NA | NA |
| Chr5:67070001-67090000   | DBP | 23 | 2953 | 2.70E-05 | NA | NA | NA | NA |
| Chr5:72090001-72110000   | DBP | 21 | 638  | 3.81E-05 | NA | NA | NA | NA |
| Chr5:88000001-88020000   | DBP | 30 | 2259 | 8.81E-05 | NA | NA | NA | NA |
| Chr5:57890001-57910000   | SBP | 5  | 16   | 5.45E-06 | NA | NA | NA | NA |
| Chr6:137830001-137850000 | DBP | 1  | 3    | 5.34E-05 | NA | NA | NA | NA |
| Chr7:90860001-90880000   | DBP | 10 | 154  | 8.07E-05 | NA | NA | NA | NA |
| Chr7:98130001-98150000   | HTN | 1  | 4    | 5.88E-05 | NA | NA | NA | NA |
| Chr8:137320001-137340000 | DBP | 3  | 539  | 1.46E-05 | NA | NA | NA | NA |
| Chr8:137330001-137350000 | DBP | 2  | 535  | 1.06E-05 | NA | NA | NA | NA |
| Chr8:122390001-122410000 | SBP | 2  | 17   | 3.94E-05 | NA | NA | NA | NA |
| Chr9:23130001-23150000   | HTN | 41 | 1380 | 2.98E-05 | NA | NA | NA | NA |
| Chr9:23140001-23160000   | HTN | 45 | 1577 | 3.31E-05 | NA | NA | NA | NA |
| Chr9:29800001-29820000   | HTN | 2  | 15   | 9.43E-05 | NA | NA | NA | NA |
| Chr10:37070001-37090000  | HTN | 1  | 112  | 8.38E-05 | NA | NA | NA | NA |

|                           |     |    |      |          |    |    |    |    |
|---------------------------|-----|----|------|----------|----|----|----|----|
| Chr10:65280001-65300000   | HTN | 3  | 937  | 3.91E-05 | NA | NA | NA | NA |
| Chr10:13080001-13100000   | SBP | 1  | 9    | 1.42E-05 | NA | NA | NA | NA |
| Chr10:13090001-13110000   | SBP | 3  | 12   | 4.21E-05 | NA | NA | NA | NA |
| Chr10:32950001-32970000   | SBP | 1  | 3    | 5.92E-05 | NA | NA | NA | NA |
| Chr11:44770001-44790000   | DBP | 7  | 232  | 7.72E-05 | NA | NA | NA | NA |
| Chr11:61730001-61750000   | DBP | 40 | 440  | 7.56E-05 | NA | NA | NA | NA |
| Chr11:73950001-73970000   | DBP | 21 | 639  | 3.18E-05 | NA | NA | NA | NA |
| Chr12:50070001-50090000   | HTN | 50 | 1588 | 2.82E-05 | NA | NA | NA | NA |
| Chr12:50080001-50100000   | HTN | 48 | 1515 | 9.66E-05 | NA | NA | NA | NA |
| Chr12:113490001-113510000 | HTN | 23 | 491  | 8.71E-05 | NA | NA | NA | NA |
| Chr12:31150001-31170000   | SBP | 1  | 14   | 8.83E-05 | NA | NA | NA | NA |
| Chr12:113090001-113110000 | SBP | 59 | 931  | 6.93E-06 | NA | NA | NA | NA |
| Chr13:50510001-50530000   | DBP | 8  | 70   | 5.23E-05 | NA | NA | NA | NA |
| Chr14:18320001-18340000   | HTN | 2  | 6    | 2.59E-05 | NA | NA | NA | NA |
| Chr15:24890001-24910000   | DBP | 30 | 549  | 4.80E-05 | NA | NA | NA | NA |
| Chr15:24900001-24920000   | DBP | 36 | 659  | 5.43E-05 | NA | NA | NA | NA |
| Chr15:38380001-38400000   | DBP | 5  | 94   | 8.63E-05 | NA | NA | NA | NA |
| Chr15:47480001-47500000   | DBP | 14 | 133  | 9.55E-05 | NA | NA | NA | NA |
| Chr15:41570001-41590000   | HTN | 31 | 325  | 4.89E-05 | NA | NA | NA | NA |
| Chr15:48270001-48290000   | HTN | 15 | 132  | 3.86E-05 | NA | NA | NA | NA |
| Chr17:70430001-70450000   | SBP | 14 | 235  | 2.92E-05 | NA | NA | NA | NA |
| Chr18:76450001-76470000   | HTN | 3  | 349  | 5.74E-05 | NA | NA | NA | NA |
| Chr19:21150001-21170000   | SBP | 18 | 1199 | 2.80E-05 | NA | NA | NA | NA |
| Chr22:34420001-34440000   | DBP | 5  | 58   | 9.84E-05 | NA | NA | NA | NA |

DBP, diastolic blood pressure (BP); HTN, hypertension; Min-P, minimum P-value; SBP, systolic BP; SMMAT-E, variant set mixed model association test - Efficient hybrid



**Table S9.** Genes and chromosomal regions with SMMAT-E  $P < 1E-4$  in aggregate rare variant analyses of the African ancestry sample.

| Aggregate Unit                                                                                           | Associated Trait | Rare Variant Sites (N) | Rare Alleles (N) | SMMAT-E value | P. |
|----------------------------------------------------------------------------------------------------------|------------------|------------------------|------------------|---------------|----|
| <i>Gene-based analysis (high confidence loss of function variants only)</i>                              |                  |                        |                  |               |    |
| AGTRAP<br>(Chr1:11736085-11750771)                                                                       | SBP              | 3                      | 46               | 9.70E-05      |    |
| G6PC3<br>(Chr17:44070700-44076344)                                                                       | HTN              | 2                      | 6                | 1.15E-05      |    |
| <i>Gene-based analysis (Loss-of-function variants, missense variants, and protein altering indels)</i>   |                  |                        |                  |               |    |
| ERBB4<br>(Chr2:211375717-212538802)                                                                      | HTN              | 24                     | 190              | 6.50E-05      |    |
| PLAT<br>(Chr8:42174718-42207565)                                                                         | DBP              | 12                     | 203              | 4.11E-05      |    |
| BLNK<br>(Chr10:96189171-96271576)                                                                        | HTN              | 2                      | 26               | 9.49E-05      |    |
| GOLT1B<br>(Chr12:21501176-21518408)                                                                      | DBP              | 2                      | 18               | 3.15E-05      |    |
| <i>Gene-based analysis (Enhancer, promoter, and exonic variants with predicted functional relevance)</i> |                  |                        |                  |               |    |
| LEXM<br>(Chr1:54806063-54842264)                                                                         | DBP              | 19                     | 361              | 2.82E-05      |    |
| MCIDAS<br>(Chr5:55218791-55227315)                                                                       | DBP              | 7                      | 451              | 1.89E-05      |    |
| WDR87<br>(Chr19:37884577-37906617)                                                                       | SBP              | 5                      | 48               | 7.67E-05      |    |
| WDR87<br>(Chr19:37884577-37906617)                                                                       | DBP              | 5                      | 48               | 3.84E-05      |    |
| GTPBP1<br>(Chr22:38704561-38738265)                                                                      | SBP              | 26                     | 623              | 8.79E-05      |    |
| <i>Sliding window analysis</i>                                                                           |                  |                        |                  |               |    |
| Chr1:54800001-54820000                                                                                   | DBP              | 22                     | 412              | 2.04E-05      |    |
| Chr1:54810001-54830000                                                                                   | DBP              | 11                     | 265              | 2.04E-05      |    |
| Chr2:67990001-68010000                                                                                   | DBP              | 9                      | 322              | 2.23E-05      |    |
| Chr2:49510001-49530000                                                                                   | HTN              | 15                     | 338              | 8.68E-06      |    |
| Chr2:183010001-183030000                                                                                 | HTN              | 4                      | 21               | 6.29E-05      |    |
| Chr2:211710001-211730000                                                                                 | HTN              | 4                      | 112              | 3.04E-05      |    |
| Chr2:211720001-211740000                                                                                 | HTN              | 2                      | 101              | 1.25E-05      |    |
| Chr2:67990001-68010000                                                                                   | SBP              | 9                      | 322              | 6.29E-05      |    |
| Chr2:137760001-137780000                                                                                 | SBP              | 4                      | 329              | 9.05E-05      |    |
| Chr2:137770001-137790000                                                                                 | SBP              | 2                      | 266              | 7.97E-05      |    |
| Chr3:88430001-88450000                                                                                   | DBP              | 11                     | 250              | 7.04E-05      |    |
| Chr3:88440001-88460000                                                                                   | DBP              | 8                      | 242              | 6.66E-05      |    |
| Chr3:19030001-19050000                                                                                   | HTN              | 4                      | 61               | 1.46E-05      |    |
| Chr3:59310001-59330000                                                                                   | SBP              | 25                     | 780              | 9.30E-05      |    |
| Chr4:22930001-22950000                                                                                   | DBP              | 9                      | 269              | 2.80E-06      |    |
| Chr4:22940001-22960000                                                                                   | DBP              | 15                     | 352              | 1.52E-05      |    |
| Chr4:171450001-171470000                                                                                 | SBP              | 1                      | 5                | 4.03E-07      |    |

|                           |     |    |     |          |
|---------------------------|-----|----|-----|----------|
| Chr5:55220001-55240000    | DBP | 13 | 545 | 3.48E-05 |
| Chr5:178790001-178810000  | DBP | 4  | 175 | 4.11E-05 |
| Chr5:1420001-1440000      | HTN | 1  | 4   | 5.29E-05 |
| Chr5:117320001-117340000  | SBP | 4  | 121 | 7.04E-05 |
| Chr5:139350001-139370000  | SBP | 9  | 48  | 3.87E-05 |
| Chr6:43880001-43900000    | DBP | 10 | 116 | 6.77E-05 |
| Chr6:43870001-43890000    | SBP | 11 | 134 | 2.64E-05 |
| Chr6:43710001-43730000    | SBP | 9  | 324 | 8.64E-05 |
| Chr6:43880001-43900000    | SBP | 10 | 116 | 5.54E-05 |
| Chr7:156150001-156170000  | HTN | 4  | 32  | 4.04E-06 |
| Chr7:33750001-33770000    | SBP | 8  | 177 | 5.02E-05 |
| Chr8:63740001-63760000    | HTN | 11 | 299 | 5.57E-05 |
| Chr8:63750001-63770000    | HTN | 10 | 294 | 4.82E-05 |
| Chr8:40410001-40430000    | SBP | 1  | 5   | 9.89E-05 |
| Chr8:79850001-79870000    | SBP | 8  | 35  | 4.52E-05 |
| Chr8:122390001-122410000  | SBP | 1  | 6   | 7.61E-06 |
| Chr9:68530001-68550000    | SBP | 7  | 52  | 2.96E-05 |
| Chr10:79080001-79100000   | DBP | 9  | 316 | 9.48E-05 |
| Chr10:83230001-83250000   | DBP | 1  | 258 | 9.29E-05 |
| Chr10:125420001-125440000 | HTN | 3  | 61  | 2.72E-07 |
| Chr10:79090001-79110000   | SBP | 6  | 179 | 6.43E-05 |
| Chr10:121190001-121210000 | SBP | 3  | 22  | 3.82E-05 |
| Chr12:67060001-67080000   | HTN | 2  | 13  | 6.85E-05 |
| Chr12:113490001-113510000 | HTN | 11 | 289 | 1.69E-05 |
| Chr13:50510001-50530000   | DBP | 5  | 46  | 2.45E-05 |
| Chr13:52160001-52180000   | DBP | 1  | 48  | 4.04E-05 |
| Chr13:65880001-65900000   | SBP | 12 | 178 | 5.57E-05 |
| Chr13:65890001-65910000   | SBP | 10 | 163 | 8.76E-05 |
| Chr14:65870001-65890000   | SBP | 4  | 20  | 7.06E-05 |
| Chr16:86900001-86920000   | HTN | 24 | 598 | 4.17E-05 |
| Chr16:86910001-86930000   | HTN | 27 | 726 | 1.54E-05 |
| Chr16:7200001-7220000     | SBP | 22 | 490 | 7.65E-05 |
| Chr19:3630001-3650000     | DBP | 12 | 175 | 5.30E-05 |
| Chr19:18770001-18790000   | SBP | 25 | 281 | 9.68E-05 |
| Chr20:10390001-10410000   | DBP | 7  | 137 | 4.18E-05 |
| Chr21:29560001-29580000   | SBP | 5  | 164 | 7.55E-05 |

DBP, diastolic blood pressure (BP); HTN, hypertension; Min-P, minimum P-value; SBP, systolic BP; SMMAT-E, variant set mixed model association test - Efficient hybrid.

**Table S10.** Genes and chromosomal regions with SMMAT-E  $P < 1E-4$  in aggregate rare variant analyses of the Asian ancestry sample.

| Aggregate Unit                                                                                           | Phe | TOPMed                 |                  |                 | UK Biobank WES Data    |                  |                 | Meta-analysis P-value |
|----------------------------------------------------------------------------------------------------------|-----|------------------------|------------------|-----------------|------------------------|------------------|-----------------|-----------------------|
|                                                                                                          |     | Rare Variant Sites (N) | Rare Alleles (N) | SMMAT-E P-value | Rare Variant Sites (N) | Rare Alleles (N) | SMMAT-E P-value |                       |
| <i>Gene-based analysis (high confidence loss of function variants only)</i>                              |     |                        |                  |                 |                        |                  |                 |                       |
| PLA2G2D<br>(Chr1:20111939-20119566)                                                                      | SBP | 1                      | 17               | 5.27E-05        | 1                      | 17               | 3.58E-01        | 2.24E-04              |
| PLA2G2D<br>(Chr1:20111939-20119566)                                                                      | DBP | 1                      | 17               | 3.09E-06        | 1                      | 17               | 6.78E-01        | 2.94E-05              |
| ARMC3<br>(Chr10:22928024-23038527)                                                                       | DBP | 1                      | 10               | 3.21E-05        | 0                      | 0                | NA              | NA                    |
| GABRB3<br>(Chr15:26543546-26773763)                                                                      | SBP | 1                      | 15               | <b>4.96E-07</b> | 0                      | 0                | NA              | NA                    |
| ZSCAN10<br>(Chr16:3088890-3099294)                                                                       | SBP | 1                      | 17               | 3.76E-05        | 1                      | 8                | 6.43E-01        | 2.82E-04              |
| PROCR<br>(Chr20:35172072-35215989)                                                                       | SBP | 1                      | 6                | 3.31E-05        | 0                      | 0                | NA              | NA                    |
| <i>Gene-based analysis (Loss-of-function variants, missense variants, and protein altering indels)</i>   |     |                        |                  |                 |                        |                  |                 |                       |
| PAPPA2<br>(Chr1:176463159-176845601)                                                                     | SBP | 1                      | 10               | 1.87E-05        | 0                      | 0                | NA              | NA                    |
| ZFYVE9<br>(Chr1:52142001-52348664)                                                                       | SBP | 5                      | 29               | 2.27E-05        | 0                      | 0                | NA              | NA                    |
| PDLIM5<br>(Chr4:94451857-94668227)                                                                       | DBP | 4                      | 15               | 2.87E-05        | 1                      | 48               | 1.52E-01        | 5.82E-05              |
| PACS1<br>(Chr11:66070272-66244744)                                                                       | DBP | 3                      | 12               | 6.86E-05        | 0                      | 0                | NA              | NA                    |
| KIF3B<br>(Chr20:32277651-32335011)                                                                       | SBP | 5                      | 20               | <b>8.81E-07</b> | 0                      | 0                | NA              | NA                    |
| <i>Gene-based analysis (Enhancer, promoter, and exonic variants with predicted functional relevance)</i> |     |                        |                  |                 |                        |                  |                 |                       |
| PLA2G2D<br>(Chr1:20111939-20119566)                                                                      | DBP | 2                      | 43               | 1.04E-05        | 1                      | 17               | 6.78E-01        | 9.06E-05              |

|                                    |     |    |     |                 |   |   |          |          |
|------------------------------------|-----|----|-----|-----------------|---|---|----------|----------|
| ORC4<br>(Chr2:147930396-148021604) | DBP | 12 | 121 | 3.37E-05        | 0 | 0 | NA       | NA       |
| CFL1P5<br>(Chr5:69312818-69313953) | SBP | 1  | 6   | 2.26E-05        | 0 | 0 | NA       | NA       |
| GCDH<br>(Chr19:12891129-12915345)  | DBP | 10 | 82  | 7.20E-05        | 1 | 4 | 1.21E-01 | 1.10E-04 |
| SYCE2<br>(Chr19:12898229-12919674) | DBP | 9  | 78  | 8.63E-05        | 1 | 4 | 1.21E-01 | 1.30E-04 |
| KIF3B<br>(Chr20:32277651-32335011) | SBP | 9  | 38  | <b>1.41E-07</b> | 0 | 0 | NA       | NA       |

*Sliding window analysis*

|                          |     |    |    |          |    |    |    |    |
|--------------------------|-----|----|----|----------|----|----|----|----|
| Chr1:20100001-20120000   | DBP | 2  | 43 | 1.04E-05 | NA | NA | NA | NA |
| Chr1:91330001-91350000   | HTN | 3  | 12 | 2.09E-06 | NA | NA | NA | NA |
| Chr1:91340001-91360000   | HTN | 4  | 16 | 3.37E-06 | NA | NA | NA | NA |
| Chr1:172090001-172110000 | HTN | 5  | 49 | 5.23E-05 | NA | NA | NA | NA |
| Chr1:172100001-172120000 | HTN | 1  | 11 | 5.25E-05 | NA | NA | NA | NA |
| Chr1:110680001-110700000 | SBP | 4  | 90 | 9.45E-06 | NA | NA | NA | NA |
| Chr1:176580001-176600000 | SBP | 1  | 10 | 1.87E-05 | NA | NA | NA | NA |
| Chr1:223780001-223800000 | SBP | 3  | 10 | 9.12E-05 | NA | NA | NA | NA |
| Chr2:155630001-155650000 | DBP | 11 | 89 | 8.04E-05 | NA | NA | NA | NA |
| Chr2:67010001-67030000   | SBP | 1  | 3  | 2.36E-05 | NA | NA | NA | NA |
| Chr3:12250001-12270000   | DBP | 4  | 18 | 9.76E-05 | NA | NA | NA | NA |
| Chr3:156210001-156230000 | HTN | 1  | 3  | 3.30E-05 | NA | NA | NA | NA |
| Chr4:111290001-111310000 | DBP | 1  | 14 | 5.06E-05 | NA | NA | NA | NA |
| Chr4:58130001-58150000   | HTN | 2  | 42 | 8.63E-05 | NA | NA | NA | NA |
| Chr4:61610001-61630000   | HTN | 1  | 3  | 3.07E-05 | NA | NA | NA | NA |
| Chr4:133140001-133160000 | SBP | 8  | 38 | 5.12E-05 | NA | NA | NA | NA |
| Chr5:38020001-38040000   | HTN | 1  | 3  | 7.26E-05 | NA | NA | NA | NA |
| Chr5:69310001-69330000   | SBP | 3  | 12 | 1.19E-05 | NA | NA | NA | NA |
| Chr6:110080001-110100000 | HTN | 2  | 6  | 7.07E-05 | NA | NA | NA | NA |
| Chr6:129290001-129310000 | SBP | 2  | 7  | 7.44E-05 | NA | NA | NA | NA |
| Chr7:41660001-41680000   | DBP | 3  | 12 | 4.76E-05 | NA | NA | NA | NA |
| Chr7:36430001-36450000   | HTN | 3  | 9  | 6.85E-05 | NA | NA | NA | NA |

|                           |     |    |     |                 |    |    |    |    |
|---------------------------|-----|----|-----|-----------------|----|----|----|----|
| Chr7:18840001-18860000    | SBP | 7  | 78  | 6.08E-05        | NA | NA | NA | NA |
| Chr7:36860001-36880000    | SBP | 1  | 3   | 2.36E-05        | NA | NA | NA | NA |
| Chr7:41660001-41680000    | SBP | 3  | 12  | 2.84E-05        | NA | NA | NA | NA |
| Chr8:65490001-65510000    | DBP | 3  | 20  | 4.91E-05        | NA | NA | NA | NA |
| Chr8:116210001-116230000  | DBP | 2  | 7   | 7.43E-05        | NA | NA | NA | NA |
| Chr8:116210001-116230000  | HTN | 2  | 7   | 9.00E-05        | NA | NA | NA | NA |
| Chr8:116220001-116240000  | HTN | 3  | 10  | 3.97E-06        | NA | NA | NA | NA |
| Chr8:96340001-96360000    | SBP | 5  | 21  | 4.86E-05        | NA | NA | NA | NA |
| Chr8:133640001-133660000  | SBP | 1  | 4   | 3.22E-05        | NA | NA | NA | NA |
| Chr9:29800001-29820000    | HTN | 1  | 10  | 6.44E-05        | NA | NA | NA | NA |
| Chr10:31410001-31430000   | DBP | 1  | 4   | 4.50E-05        | NA | NA | NA | NA |
| Chr10:13080001-13100000   | SBP | 1  | 9   | 1.20E-05        | NA | NA | NA | NA |
| Chr10:31410001-31430000   | SBP | 1  | 4   | 6.95E-05        | NA | NA | NA | NA |
| Chr11:95690001-95710000   | HTN | 3  | 20  | 2.01E-05        | NA | NA | NA | NA |
| Chr11:134570001-134590000 | SBP | 1  | 3   | 6.06E-05        | NA | NA | NA | NA |
| Chr12:45900001-45920000   | DBP | 7  | 87  | 8.43E-05        | NA | NA | NA | NA |
| Chr12:63260001-63280000   | SBP | 1  | 4   | 5.13E-05        | NA | NA | NA | NA |
| Chr12:102950001-102970000 | SBP | 15 | 134 | 5.45E-05        | NA | NA | NA | NA |
| Chr13:80100001-80120000   | SBP | 6  | 58  | 3.87E-05        | NA | NA | NA | NA |
| Chr13:80110001-80130000   | SBP | 5  | 34  | 8.11E-05        | NA | NA | NA | NA |
| Chr13:83680001-83700000   | SBP | 3  | 22  | 2.55E-05        | NA | NA | NA | NA |
| Chr13:83690001-83710000   | SBP | 4  | 25  | 1.94E-05        | NA | NA | NA | NA |
| Chr14:39140001-39160000   | HTN | 2  | 8   | 3.88E-05        | NA | NA | NA | NA |
| Chr14:97240001-97260000   | HTN | 2  | 7   | 8.20E-05        | NA | NA | NA | NA |
| Chr15:38390001-38410000   | DBP | 3  | 61  | 9.58E-05        | NA | NA | NA | NA |
| Chr15:68330001-68350000   | HTN | 3  | 14  | 2.42E-05        | NA | NA | NA | NA |
| Chr15:35310001-35330000   | SBP | 1  | 3   | 2.36E-05        | NA | NA | NA | NA |
| Chr17:15270001-15290000   | SBP | 1  | 6   | 6.02E-05        | NA | NA | NA | NA |
| Chr17:55240001-55260000   | SBP | 1  | 4   | 9.38E-05        | NA | NA | NA | NA |
| Chr17:64920001-64940000   | SBP | 3  | 41  | 5.71E-05        | NA | NA | NA | NA |
| Chr18:60200001-60220000   | HTN | 1  | 3   | 6.02E-05        | NA | NA | NA | NA |
| Chr19:39780001-39800000   | SBP | 4  | 28  | 6.19E-05        | NA | NA | NA | NA |
| Chr20:32300001-32320000   | SBP | 5  | 25  | <b>3.23E-08</b> | NA | NA | NA | NA |
| Chr20:32310001-32330000   | SBP | 4  | 17  | <b>5.51E-07</b> | NA | NA | NA | NA |

|                         |     |   |    |          |    |    |    |    |
|-------------------------|-----|---|----|----------|----|----|----|----|
| Chr21:17640001-17660000 | DBP | 1 | 32 | 3.24E-05 | NA | NA | NA | NA |
|-------------------------|-----|---|----|----------|----|----|----|----|

---

DBP, diastolic blood pressure (BP); HTN, hypertension; Min-P, minimum P-value; SBP, systolic BP; SMMAT-E, variant set mixed model association test -

**Table S11.** Genes and chromosomal regions with SMMAT-E  $P < 1E-4$  in aggregate rare variant analyses of the European ancestry sample.

| Aggregate Unit                                                                                           | Phe | TOPMed                    |                     |                    | UK Biobank WES Data       |                     |                    | Meta-analysis<br>P-value |
|----------------------------------------------------------------------------------------------------------|-----|---------------------------|---------------------|--------------------|---------------------------|---------------------|--------------------|--------------------------|
|                                                                                                          |     | Rare Variant<br>Sites (N) | Rare Alleles<br>(N) | SMMAT-E<br>P-value | Rare Variant<br>Sites (N) | Rare Alleles<br>(N) | SMMAT-E<br>P-value |                          |
| <i>Gene-based analysis (high confidence loss of function variants only)</i>                              |     |                           |                     |                    |                           |                     |                    |                          |
| GPR156<br>(Chr3:120165481-120285074)                                                                     | DBP | 4                         | 19                  | 5.51E-05           | 4                         | 195                 | 6.04E-01           | 3.76E-04                 |
| DAND5<br>(Chr19:12969618-12974753)                                                                       | DBP | 4                         | 24                  | 7.48E-05           | 2                         | 42                  | 4.30E-01           | 3.65E-04                 |
| BPI<br>(Chr20:38304150-38337505)                                                                         | HTN | 4                         | 23                  | 8.45E-05           | 3                         | 54                  | 8.63E-01           | 7.68E-04                 |
| <i>Gene-based analysis (Loss-of-function variants, missense variants, and protein altering indels)</i>   |     |                           |                     |                    |                           |                     |                    |                          |
| AMY2B<br>(Chr1:103554644-103579534)                                                                      | HTN | 22                        | 507                 | 4.27E-05           | 16                        | 2548                | 5.10E-01           | 2.55E-04                 |
| RBM45<br>(Chr2:178112409-178129656)                                                                      | SBP | 7                         | 82                  | 1.01E-05           | 7                         | 340                 | 6.40E-01           | 8.37E-05                 |
| MZT2B<br>(Chr2:130182262-130190727)                                                                      | DBP | 1                         | 3                   | 3.11E-05           | 1                         | 5                   | 3.10E-02           | <b>1.43E-05</b>          |
| RNF175<br>(Chr4:153710125-153760983)                                                                     | SBP | 6                         | 278                 | 8.25E-05           | 5                         | 1545                | 7.54E-01           | 6.65E-04                 |
| TDRD1<br>(Chr10:114174442-114232669)                                                                     | HTN | 5                         | 115                 | 4.57E-05           | 4                         | 775                 | 1.00E+00           | 5.02E-04                 |
| ERG<br>(Chr21:38367261-38661783)                                                                         | DBP | 8                         | 41                  | 3.28E-05           | 5                         | 258                 | 6.78E-01           | 2.60E-04                 |
| TST<br>(Chr22:37010859-37020183)                                                                         | DBP | 18                        | 95                  | 3.43E-05           | 16                        | 418                 | 7.72E-01           | 3.05E-04                 |
| <i>Gene-based analysis (Enhancer, promoter, and exonic variants with predicted functional relevance)</i> |     |                           |                     |                    |                           |                     |                    |                          |
| RN7SL273P<br>(Chr6:37361185-37361483)                                                                    | HTN | 1                         | 4                   | 7.52E-05           | 0                         | 0                   | NA                 | NA                       |
| OR9N1P<br>(Chr7:141911402-141912022)                                                                     | SBP | 4                         | 44                  | 1.38E-05           | 0                         | 0                   | NA                 | NA                       |
| GATS<br>(Chr7:100187988-100272274)                                                                       | DBP | 23                        | 297                 | 4.35E-05           | 17                        | 1357                | 8.85E-01           | 4.30E-04                 |

|                                                      |     |    |      |          |    |      |          |                 |
|------------------------------------------------------|-----|----|------|----------|----|------|----------|-----------------|
| STAG3L5P-PVRIG2P-PILRB<br>(Chr7:100336065-100367831) | DBP | 16 | 266  | 3.98E-05 | 1  | 4    | 4.80E-01 | 2.27E-04        |
| PVRIG2P<br>(Chr7:100352318-100353936)                | DBP | 9  | 194  | 1.89E-05 | 0  | 0    | NA       | NA              |
| STAG3L5P<br>(Chr7:100336079-100341328)               | DBP | 15 | 261  | 3.24E-05 | 0  | 0    | NA       | NA              |
| PILRB<br>(Chr7:100358003-100367831)                  | DBP | 10 | 199  | 2.41E-05 | 1  | 4    | 4.80E-01 | 1.43E-04        |
| NDRG2<br>(Chr14:21016763-21070872)                   | DBP | 64 | 1007 | 6.08E-05 | 34 | 3909 | 1.07E-02 | <b>9.95E-06</b> |
| TPPP2<br>(Chr14:21024262-21036352)                   | DBP | 36 | 649  | 5.87E-05 | 26 | 3237 | 1.69E-02 | <b>1.47E-05</b> |
| RP11-297M9.1<br>(Chr16:9666885-9676843)              | DBP | 1  | 15   | 4.98E-05 | 0  | 0    | NA       | NA              |
| RP11-27G24.3<br>(Chr18:59459072-59465682)            | DBP | 1  | 4    | 9.97E-05 | 1  | 11   | 8.51E-01 | 8.80E-04        |

*Sliding window analysis*

|                          |     |    |       |         |    |    |    |    |
|--------------------------|-----|----|-------|---------|----|----|----|----|
| Chr1:185910001-185930000 | DBP | 10 | 92    | 2.8E-05 | NA | NA | NA | NA |
| Chr1:2450001-2470000     | HTN | 2  | 23    | 4.3E-05 | NA | NA | NA | NA |
| Chr1:94540001-94560000   | HTN | 3  | 56363 | 9.7E-05 | NA | NA | NA | NA |
| Chr1:94550001-94570000   | HTN | 1  | 56342 | 1.9E-05 | NA | NA | NA | NA |
| Chr1:28460001-28480000   | SBP | 5  | 22    | 3.7E-05 | NA | NA | NA | NA |
| Chr1:99220001-99240000   | SBP | 5  | 23    | 8.4E-05 | NA | NA | NA | NA |
| Chr1:99230001-99250000   | SBP | 2  | 16    | 3.9E-05 | NA | NA | NA | NA |
| Chr2:50370001-50390000   | DBP | 10 | 66    | 8.2E-05 | NA | NA | NA | NA |
| Chr2:174360001-174380000 | DBP | 4  | 48    | 7.0E-05 | NA | NA | NA | NA |
| Chr2:10750001-10770000   | HTN | 1  | 3     | 6.1E-05 | NA | NA | NA | NA |
| Chr2:117210001-117230000 | HTN | 2  | 7     | 8.0E-05 | NA | NA | NA | NA |
| Chr2:193750001-193770000 | HTN | 1  | 4     | 7.2E-06 | NA | NA | NA | NA |
| Chr3:130510001-130530000 | DBP | 8  | 752   | 4.4E-05 | NA | NA | NA | NA |
| Chr3:130520001-130540000 | DBP | 6  | 746   | 3.9E-05 | NA | NA | NA | NA |
| Chr3:41020001-41040000   | HTN | 2  | 15    | 8.9E-05 | NA | NA | NA | NA |
| Chr3:145600001-145620000 | HTN | 1  | 17    | 5.3E-05 | NA | NA | NA | NA |
| Chr4:124730001-124750000 | DBP | 2  | 403   | 2.3E-05 | NA | NA | NA | NA |



|                           |     |    |      |         |    |    |    |    |
|---------------------------|-----|----|------|---------|----|----|----|----|
| Chr4:124740001-124760000  | DBP | 3  | 406  | 1.6E-05 | NA | NA | NA | NA |
| Chr4:154050001-154070000  | DBP | 2  | 68   | 4.5E-05 | NA | NA | NA | NA |
| Chr4:181230001-181250000  | DBP | 28 | 556  | 7.9E-05 | NA | NA | NA | NA |
| Chr4:75300001-75320000    | HTN | 1  | 3    | 3.1E-05 | NA | NA | NA | NA |
| Chr5:117760001-117780000  | HTN | 5  | 42   | 2.4E-05 | NA | NA | NA | NA |
| Chr5:6140001-6160000      | SBP | 1  | 4    | 9.9E-05 | NA | NA | NA | NA |
| Chr5:127520001-127540000  | SBP | 12 | 151  | 1.7E-05 | NA | NA | NA | NA |
| Chr5:172040001-172060000  | SBP | 16 | 164  | 6.5E-05 | NA | NA | NA | NA |
| Chr5:172050001-172070000  | SBP | 11 | 138  | 4.3E-05 | NA | NA | NA | NA |
| Chr6:37350001-37370000    | HTN | 1  | 4    | 7.5E-05 | NA | NA | NA | NA |
| Chr7:100260001-100280000  | DBP | 1  | 135  | 9.1E-06 | NA | NA | NA | NA |
| Chr7:100340001-100360000  | DBP | 10 | 199  | 2.4E-05 | NA | NA | NA | NA |
| Chr7:133790001-133810000  | DBP | 11 | 277  | 1.9E-05 | NA | NA | NA | NA |
| Chr7:98130001-98150000    | HTN | 1  | 4    | 5.2E-05 | NA | NA | NA | NA |
| Chr7:141900001-141920000  | SBP | 7  | 69   | 4.0E-05 | NA | NA | NA | NA |
| Chr8:83600001-83620000    | DBP | 8  | 54   | 1.4E-05 | NA | NA | NA | NA |
| Chr8:49730001-49750000    | HTN | 5  | 26   | 3.6E-05 | NA | NA | NA | NA |
| Chr8:62060001-62080000    | HTN | 1  | 21   | 9.2E-05 | NA | NA | NA | NA |
| Chr8:141190001-141210000  | HTN | 1  | 38   | 9.9E-05 | NA | NA | NA | NA |
| Chr9:23130001-23150000    | HTN | 17 | 520  | 9.3E-05 | NA | NA | NA | NA |
| Chr9:23140001-23160000    | HTN | 21 | 510  | 1.5E-05 | NA | NA | NA | NA |
| Chr9:23140001-23160000    | SBP | 21 | 510  | 6.5E-05 | NA | NA | NA | NA |
| Chr9:125950001-125970000  | SBP | 64 | 1510 | 8.1E-05 | NA | NA | NA | NA |
| Chr10:16900001-16920000   | DBP | 18 | 587  | 1.1E-05 | NA | NA | NA | NA |
| Chr10:16990001-17010000   | DBP | 5  | 18   | 9.7E-05 | NA | NA | NA | NA |
| Chr10:85480001-85500000   | DBP | 6  | 26   | 5.7E-05 | NA | NA | NA | NA |
| Chr10:98310001-98330000   | DBP | 8  | 65   | 3.2E-05 | NA | NA | NA | NA |
| Chr10:36150001-36170000   | HTN | 1  | 10   | 6.7E-07 | NA | NA | NA | NA |
| Chr10:32950001-32970000   | SBP | 1  | 3    | 6.0E-05 | NA | NA | NA | NA |
| Chr11:7670001-7690000     | DBP | 9  | 401  | 9.3E-05 | NA | NA | NA | NA |
| Chr11:31950001-31970000   | SBP | 15 | 126  | 6.7E-05 | NA | NA | NA | NA |
| Chr11:31960001-31980000   | SBP | 16 | 130  | 7.1E-05 | NA | NA | NA | NA |
| Chr12:103130001-103150000 | HTN | 7  | 419  | 6.9E-05 | NA | NA | NA | NA |
| Chr12:103140001-103160000 | HTN | 9  | 428  | 6.9E-05 | NA | NA | NA | NA |

|                           |     |    |     |         |    |    |    |    |
|---------------------------|-----|----|-----|---------|----|----|----|----|
| Chr12:31140001-31160000   | SBP | 1  | 7   | 8.2E-05 | NA | NA | NA | NA |
| Chr13:39670001-39690000   | DBP | 9  | 39  | 9.1E-05 | NA | NA | NA | NA |
| Chr13:85800001-85820000   | DBP | 2  | 28  | 9.0E-05 | NA | NA | NA | NA |
| Chr13:106210001-106230000 | DBP | 13 | 406 | 2.4E-05 | NA | NA | NA | NA |
| Chr13:85800001-85820000   | HTN | 2  | 28  | 3.4E-05 | NA | NA | NA | NA |
| Chr13:85800001-85820000   | SBP | 2  | 28  | 3.3E-05 | NA | NA | NA | NA |
| Chr14:21010001-21030000   | DBP | 38 | 747 | 7.7E-05 | NA | NA | NA | NA |
| Chr14:21020001-21040000   | DBP | 32 | 610 | 6.7E-05 | NA | NA | NA | NA |
| Chr14:90360001-90380000   | DBP | 7  | 457 | 9.7E-05 | NA | NA | NA | NA |
| Chr15:45870001-45890000   | HTN | 6  | 33  | 6.7E-05 | NA | NA | NA | NA |
| Chr15:67440001-67460000   | HTN | 10 | 198 | 2.1E-05 | NA | NA | NA | NA |
| Chr15:67450001-67470000   | HTN | 17 | 280 | 3.4E-06 | NA | NA | NA | NA |
| Chr15:73990001-74010000   | HTN | 3  | 24  | 4.6E-05 | NA | NA | NA | NA |
| Chr15:67440001-67460000   | SBP | 10 | 198 | 6.6E-05 | NA | NA | NA | NA |
| Chr15:67450001-67470000   | SBP | 17 | 280 | 1.4E-05 | NA | NA | NA | NA |
| Chr16:9660001-9680000     | DBP | 5  | 32  | 7.3E-05 | NA | NA | NA | NA |
| Chr16:9670001-9690000     | DBP | 3  | 22  | 8.6E-05 | NA | NA | NA | NA |
| Chr18:26260001-26280000   | HTN | 1  | 3   | 1.6E-05 | NA | NA | NA | NA |
| Chr19:35430001-35450000   | SBP | 5  | 29  | 8.5E-05 | NA | NA | NA | NA |
| Chr20:8100001-8120000     | HTN | 1  | 4   | 7.6E-05 | NA | NA | NA | NA |
| Chr22:37000001-37020000   |     | 20 | 105 | 4.1E-05 | NA | NA | NA | NA |

DBP, diastolic blood pressure (BP); HTN, hypertension; Min-P, minimum P-value; SBP, systolic BP; SMMAT-E, variant set mixed model association test - Efficient hybrid.

**Table S12.** Genes and chromosomal regions with SMMAT-E  $P < 1E-4$  in aggregate rare variant analyses of the Hispanic ancestry sample.

| Aggregate Unit                                                                                           | Associated Trait | Rare Variant Sites (N) | Rare Alleles (N) | SMMAT-E P-value |
|----------------------------------------------------------------------------------------------------------|------------------|------------------------|------------------|-----------------|
| <i>Gene-based analysis (high confidence loss of function variants only)</i>                              |                  |                        |                  |                 |
| ESAM<br>(Chr11:124753126-124762290)                                                                      | DBP              | 1                      | 47               | 2.86E-05        |
| KIR3DL2<br>(Chr19:54850320-54867209)                                                                     | HTN              | 1                      | 3                | 7.57E-05        |
| <i>Gene-based analysis (Loss-of-function variants, missense variants, and protein altering indels)</i>   |                  |                        |                  |                 |
| CACNA2D3<br>(Chr3:54122552-55074557)                                                                     | HTN              | 8                      | 117              | 8.59E-05        |
| MRPS18B<br>(Chr6:30617320-30626393)                                                                      | DBP              | 2                      | 7                | 4.09E-05        |
| OSGIN2<br>(Chr8:89901868-89935614)                                                                       | SBP              | 1                      | 67               | 2.77E-05        |
| SMC2<br>(Chr9:104093760-104141419)                                                                       | SBP              | 7                      | 128              | 6.56E-05        |
| RTRAF<br>(Chr14:51989546-52010694)                                                                       | SBP              | 1                      | 4                | 5.40E-05        |
| <i>Gene-based analysis (Enhancer, promoter, and exonic variants with predicted functional relevance)</i> |                  |                        |                  |                 |
| LYSMD1<br>(Chr1:151148496-151165902)                                                                     | SBP              | 11                     | 145              | 1.44E-05        |
| FLOT1<br>(Chr6:30727709-30742851)                                                                        | DBP              | 3                      | 16               | 9.36E-05        |
| TUBB<br>(Chr6:30720201-30725426)                                                                         | DBP              | 2                      | 8                | 1.86E-05        |
| TUBB<br>(Chr6:30720201-30725426)                                                                         | SBP              | 2                      | 8                | 3.95E-06        |
| OSGIN2<br>(Chr8:89901868-89935614)                                                                       | SBP              | 1                      | 67               | 2.77E-05        |
| MSC<br>(Chr8:71841542-71844496)                                                                          | SBP              | 5                      | 107              | 6.19E-05        |
| SMC2<br>(Chr9:104093760-104141419)                                                                       | SBP              | 10                     | 145              | 7.43E-05        |
| SMC2-AS1<br>(Chr9:104080024-104092474)                                                                   | SBP              | 3                      | 63               | 3.20E-05        |
| C14orf166<br>(Chr14:51989546-52010694)                                                                   | SBP              | 1                      | 4                | 5.40E-05        |
| RAB15<br>(Chr14:64945816-64972336)                                                                       | SBP              | 5                      | 50               | 6.48E-05        |
| DNAH9<br>(Chr17:11598470-11970168)                                                                       | SBP              | 48                     | 715              | 2.76E-05        |
| AC005387.2<br>(Chr19:18532908-18536188)                                                                  | HTN              | 1                      | 4                | 4.26E-05        |
| <i>Sliding window analysis</i>                                                                           |                  |                        |                  |                 |
| Chr1:25020001-25040000                                                                                   | DBP              | 8                      | 146              | 9.29E-05        |
| Chr1:86630001-86650000                                                                                   | DBP              | 9                      | 138              | 4.42E-06        |
| Chr1:86640001-86660000                                                                                   | DBP              | 4                      | 87               | 1.78E-06        |
| Chr1:25020001-25040000                                                                                   | HTN              | 8                      | 142              | 4.40E-05        |

|                           |     |    |     |          |
|---------------------------|-----|----|-----|----------|
| Chr2:117940001-117960000  | DBP | 1  | 3   | 6.00E-05 |
| Chr2:146430001-146450000  | HTN | 12 | 119 | 2.65E-05 |
| Chr2:197000001-197020000  | HTN | 2  | 64  | 1.67E-05 |
| Chr2:197000001-197020000  | SBP | 2  | 65  | 1.91E-05 |
| Chr3:20001-40000          | SBP | 8  | 104 | 8.29E-06 |
| Chr3:9660001-9680000      | SBP | 1  | 5   | 8.17E-05 |
| Chr4:34510001-34530000    | DBP | 4  | 85  | 6.03E-05 |
| Chr4:122920001-122940000  | SBP | 4  | 13  | 4.58E-05 |
| Chr5:61820001-61840000    | DBP | 3  | 85  | 3.76E-05 |
| Chr5:61830001-61850000    | DBP | 4  | 92  | 1.92E-05 |
| Chr5:74150001-74170000    | SBP | 3  | 82  | 4.83E-05 |
| Chr5:127470001-127490000  | SBP | 2  | 38  | 8.34E-05 |
| Chr6:30720001-30740000    | DBP | 3  | 11  | 5.47E-06 |
| Chr6:139830001-139850000  | DBP | 12 | 111 | 3.53E-05 |
| Chr6:139840001-139860000  | DBP | 10 | 102 | 2.39E-05 |
| Chr6:30720001-30740000    | SBP | 3  | 11  | 6.66E-05 |
| Chr7:18650001-18670000    | DBP | 10 | 76  | 4.58E-05 |
| Chr7:116040001-116060000  | SBP | 2  | 35  | 5.80E-05 |
| Chr8:71830001-71850000    | SBP | 5  | 107 | 6.19E-05 |
| Chr8:89910001-89930000    | SBP | 1  | 67  | 2.77E-05 |
| Chr9:17010001-17030000    | SBP | 11 | 113 | 3.47E-05 |
| Chr9:81360001-81380000    | SBP | 10 | 230 | 1.38E-05 |
| Chr9:81370001-81390000    | SBP | 17 | 269 | 3.45E-05 |
| Chr9:104080001-104100000  | SBP | 4  | 106 | 2.21E-05 |
| Chr9:104090001-104110000  | SBP | 3  | 90  | 7.68E-06 |
| Chr10:1130001-1150000     | DBP | 7  | 63  | 6.55E-05 |
| Chr11:84500001-84520000   | DBP | 2  | 13  | 5.11E-05 |
| Chr11:37780001-37800000   | SBP | 1  | 8   | 5.15E-05 |
| Chr11:124950001-124970000 | SBP | 2  | 58  | 3.30E-05 |
| Chr13:96860001-96880000   | HTN | 4  | 88  | 2.33E-05 |
| Chr14:64940001-64960000   | SBP | 4  | 45  | 6.15E-05 |
| Chr16:6610001-6630000     | HTN | 5  | 87  | 5.60E-05 |
| Chr16:22750001-22770000   | SBP | 7  | 92  | 4.21E-05 |
| Chr17:54410001-54430000   | DBP | 1  | 14  | 2.62E-05 |
| Chr17:70420001-70440000   | SBP | 3  | 73  | 9.98E-05 |
| Chr17:70430001-70450000   | SBP | 1  | 56  | 3.18E-05 |
| Chr18:38460001-38480000   | SBP | 11 | 277 | 4.32E-06 |
| Chr20:7000001-7020000     | DBP | 7  | 60  | 2.63E-05 |
| Chr20:12860001-12880000   | DBP | 1  | 57  | 4.04E-06 |
| Chr20:12870001-12890000   | DBP | 2  | 97  | 1.34E-05 |
| Chr20:12860001-12880000   | SBP | 1  | 57  | 3.88E-06 |
| Chr20:12870001-12890000   | SBP | 2  | 97  | 1.59E-05 |

DBP, diastolic blood pressure (BP); HTN, hypertension; Min-P, minimum P-value; SBP, systolic BP; SMMAT-E, variant set mixed model association test - Efficient hybrid.

**Table S13.** Genes and chromosomal regions with SMMAT-E  $P < 1E-4$  in aggregate rare variant analyses of the Samoan ancestry sample.

| Aggregate Unit                                                                                           | Associated Trait | Rare Variant Sites (N) | Rare Alleles (N) | SMMAT-E P-value |
|----------------------------------------------------------------------------------------------------------|------------------|------------------------|------------------|-----------------|
| <i>Gene-based analysis (Enhancer, promoter, and exonic variants with predicted functional relevance)</i> |                  |                        |                  |                 |
| RASL10B<br>(Chr17:35731639-35743521)                                                                     | HTN              | 1                      | 3                | 4.16E-05        |
| TAF15<br>(Chr17:35809484-35847242)                                                                       | HTN              | 6                      | 23               | 5.43E-05        |
| GAS2L2<br>(Chr17:35744511-35753239)                                                                      | HTN              | 1                      | 3                | 4.16E-05        |
| <i>Sliding window analysis</i>                                                                           |                  |                        |                  |                 |
| Chr1:213420001-213440000                                                                                 | HTN              | 1                      | 4                | 5.20E-06        |
| Chr2:224750001-224770000                                                                                 | SBP              | 1                      | 4                | 7.97E-05        |
| Chr13:103160001-103180000                                                                                | SBP              | 3                      | 27               | 4.64E-05        |
| Chr16:71100001-71120000                                                                                  | DBP              | 1                      | 3                | 9.97E-05        |
| Chr16:50960001-50980000                                                                                  | SBP              | 3                      | 9                | 5.45E-05        |
| Chr17:35700001-35720000                                                                                  | HTN              | 1                      | 4                | 9.81E-07        |
| Chr17:35730001-35750000                                                                                  | HTN              | 1                      | 3                | 4.16E-05        |
| Chr22:33370001-33390000                                                                                  | HTN              | 1                      | 25               | 7.58E-05        |

DBP, diastolic blood pressure (BP); HTN, hypertension; Min-P, minimum P-value; SBP, systolic BP; SMMAT-E, variant set mixed model association test - Efficient hybrid.

**Table S14.** SNVs identified by leave-one-out analyses of aggregated rare variant units with SMMAT-E  $P < 1E-04$  in multi-ancestry analyses.

| Aggregate Unit                                         | Associated Trait | SMMAT-E P-value | Marker          | rsID        | Alleles (Alt/Ref) | AAF      | LOO P-value | SVA P-value | Stage-2 Sample Availability |
|--------------------------------------------------------|------------------|-----------------|-----------------|-------------|-------------------|----------|-------------|-------------|-----------------------------|
| <i>Gene-based Analyses</i>                             |                  |                 |                 |             |                   |          |             |             |                             |
| RP13-514E23.1<br>(Chr4:86012296-86013874) <sup>†</sup> | HTN              | 8.97E-05        | Chr4:86016539   | rs974993552 | G/A               | 4.90E-05 | 1.05E-02    | 1.72E-03    | NA                          |
| RP13-514E23.1<br>(Chr4:86012296-86013874) <sup>†</sup> | HTN              | 8.97E-05        | Chr4:86017181   | rs183689080 | C/T               | 1.00E-03 | 1.53E-03    | 2.62E-02    | NA                          |
| SYT7<br>(Chr11:61513714-61588404) <sup>†</sup>         | SBP              | 8.86E-05        | Chr11:61515348  | rs115815714 | G/C               | 8.09E-03 | 6.07E-02    | 3.15E-05    | MVP                         |
| DNAJB13<br>(Chr11:73950319-73970287) <sup>*</sup>      | DBP              | 2.91E-05        | Chr11:73964917  | rs139317756 | G/T               | 1.55E-03 | 4.13E-03    | 4.13E-04    | UKBB                        |
| DNAJB13<br>(Chr11:73950319-73970287) <sup>†</sup>      | DBP              | 7.14E-05        | Chr11:73964917  | rs139317756 | G/T               | 1.55E-03 | 2.45E-02    | 4.13E-04    | UKBB                        |
| DNAJB13<br>(Chr11:73950319-73970287) <sup>*</sup>      | DBP              | 2.91E-05        | Chr11:73969282  | rs140556652 | A/G               | 1.44E-03 | 2.24E-03    | 2.32E-03    | UKBB, MVP                   |
| DNAJB13<br>(Chr11:73950319-73970287) <sup>†</sup>      | DBP              | 7.14E-05        | Chr11:73969282  | rs140556652 | A/G               | 1.44E-03 | 2.42E-03    | 2.32E-03    | UKBB, MVP                   |
| RASAL1<br>(Chr12:113096515-113136248) <sup>†</sup>     | SBP              | 4.73E-05        | Chr12:113095320 | rs566085858 | G/T               | 5.29E-04 | 9.31E-04    | 8.06E-04    | UKBB, MVP                   |
| RASAL1<br>(Chr12:113096515-113136248) <sup>†</sup>     | SBP              | 4.73E-05        | Chr12:113105737 | rs142556970 | G/A               | 1.86E-03 | 6.96E-03    | 1.32E-03    | UKBB, MVP                   |
| SMARCD1<br>(Chr12:50085236-50100707) <sup>†</sup>      | HTN              | 4.95E-05        | Chr12:50081692  | rs140894777 | G/A               | 7.59E-03 | 2.86E-03    | 4.65E-03    | UKBB, MVP                   |
| SMARCD1<br>(Chr12:50085236-50100707) <sup>†</sup>      | HTN              | 4.95E-05        | Chr12:50086319  | rs139120093 | T/G               | 2.75E-03 | 8.14E-03    | 1.23E-03    | UKBB, MVP                   |
| GABRB3<br>(Chr15:26543546-26773763) <sup>‡</sup>       | SBP              | 2.67E-06        | Chr15:26628999  | rs990895163 | T/C               | 1.47E-04 | 3.95E-01    | 9.46E-07    | MVP                         |

|                                                  |     |          |                |              |         |          |          |          |           |
|--------------------------------------------------|-----|----------|----------------|--------------|---------|----------|----------|----------|-----------|
| ZNF431<br>(Chr19:21142009-21196053) <sup>†</sup> | SBP | 8.40E-05 | Chr19:21151200 | rs145645636  | T/C     | 9.47E-03 | 4.95E-02 | 2.34E-04 | UKBB, MVP |
| <i>Sliding Window Analyses</i>                   |     |          |                |              |         |          |          |          |           |
| Chr1:227060001-227080000                         | DBP | 4.93E-05 | Chr1:227068762 | rs754226051  | T/TAATA | 6.27E-04 | 4.01E-01 | 1.50E-05 | NA        |
| Chr2:196990001-197010000                         | DBP | 8.12E-05 | Chr2:196992672 | rs933406987  | T/G     | 2.12E-03 | 7.59E-04 | 2.34E-02 | NA        |
| Chr2:211720001-211740000                         | HTN | 8.15E-06 | Chr2:211725173 | rs148992844  | G/T     | 3.82E-04 | 3.45E-01 | 5.39E-06 | MVP       |
| Chr2:137760001-137780000                         | SBP | 4.98E-05 | Chr2:137770284 | rs189500544  | G/A     | 1.32E-03 | 1.16E-01 | 1.04E-05 | UKBB, MVP |
| Chr2:137770001-137790000                         | SBP | 2.75E-05 | Chr2:137770284 | rs189500544  | G/A     | 1.32E-03 | 3.95E-01 | 1.04E-05 | UKBB, MVP |
| Chr3:60900001-60920000                           | DBP | 4.14E-05 | Chr3:60914975  | rs191538623  | A/T     | 1.02E-03 | 1.35E-03 | 3.02E-03 | UKBB      |
| Chr3:60900001-60920000                           | DBP | 4.14E-05 | Chr3:60916708  | rs551024841  | T/C     | 6.46E-04 | 2.03E-03 | 9.07E-04 | UKBB, MVP |
| Chr3:60910001-60930000                           | DBP | 8.32E-05 | Chr3:60914975  | rs191538623  | A/T     | 1.02E-03 | 2.44E-03 | 3.02E-03 | UKBB      |
| Chr3:60910001-60930000                           | DBP | 8.32E-05 | Chr3:60916708  | rs551024841  | T/C     | 6.46E-04 | 3.28E-03 | 9.07E-04 | UKBB, MVP |
| Chr3:100320001-100340000                         | HTN | 4.32E-06 | Chr3:100339146 | rs373731645  | T/C     | 2.74E-04 | 1.18E-04 | 2.46E-03 | UKBB      |
| Chr3:100320001-100340000                         | HTN | 4.32E-06 | Chr3:100339149 | rs200416332  | A/G     | 8.63E-04 | 2.09E-04 | 2.53E-03 | UKBB, MVP |
| Chr3:130510001-130530000                         | DBP | 3.69E-05 | Chr3:130523920 | rs191631641  | A/G     | 7.05E-04 | 6.82E-04 | 1.16E-02 | UKBB, MVP |
| Chr3:130520001-130540000                         | DBP | 3.37E-05 | Chr3:130523920 | rs191631641  | A/G     | 7.05E-04 | 6.38E-04 | 1.16E-02 | UKBB, MVP |
| Chr3:179510001-179530000                         | DBP | 6.44E-05 | Chr3:179512562 | rs150627458  | T/G     | 4.15E-03 | 1.05E-03 | 2.08E-02 | NA        |
| Chr3:179510001-179530000                         | DBP | 6.44E-05 | Chr3:179512636 | rs1010846518 | A/T     | 1.76E-04 | 1.91E-02 | 4.85E-04 | NA        |
| Chr4:38240001-38260000                           | SBP | 3.55E-05 | Chr4:38254212  | rs1000667787 | C/T     | 3.03E-04 | 1.00E-02 | 4.10E-04 | UKBB, MVP |
| Chr4:44130001-44150000                           | DBP | 1.47E-05 | Chr4:44148142  | rs142082332  | A/T     | 1.07E-03 | 6.88E-01 | 8.44E-07 | UKBB      |
| Chr4:44140001-44160000                           | DBP | 1.50E-05 | Chr4:44148142  | rs142082332  | A/T     | 1.07E-03 | 4.42E-01 | 8.44E-07 | UKBB      |
| Chr4:47020001-47040000                           | SBP | 2.28E-05 | Chr4:47031478  | rs944297641  | C/G     | 3.72E-04 | 3.41E-03 | 4.77E-04 | UKBB, MVP |
| Chr4:47030001-47050000                           | SBP | 4.43E-05 | Chr4:47031478  | rs944297641  | C/G     | 3.72E-04 | 5.60E-03 | 4.77E-04 | UKBB, MVP |
| Chr4:47030001-47050001                           | SBP | 4.43E-05 | Chr4:47031545  | rs80151988   | T/C     | 4.89E-04 | 7.01E-04 | 1.85E-02 | UKBB, MVP |
| Chr4:98480001-98500000                           | HTN | 3.55E-05 | Chr4:98482187  | rs767187895  | T/G     | 5.88E-05 | 4.09E-01 | 1.13E-05 | NA        |
| Chr4:124730001-124750000                         | DBP | 2.62E-05 | Chr4:124746752 | rs1050104610 | C/T     | 5.97E-04 | 5.90E-01 | 6.24E-06 | UKBB      |
| Chr4:124740001-124760000                         | DBP | 1.77E-05 | Chr4:124746752 | rs1050104610 | C/T     | 5.97E-04 | 4.74E-01 | 6.24E-06 | UKBB      |
| Chr4:154050001-154070000                         | DBP | 6.22E-05 | Chr4:154069962 | rs938675698  | C/A     | 3.92E-05 | 3.68E-01 | 2.01E-05 | UKBB      |
| Chr5:57890001-57910000                           | DBP | 1.93E-06 | Chr5:57902163  | rs780345403  | G/A     | 2.94E-05 | 2.35E-04 | 9.53E-04 | UKBB      |
| Chr5:57890001-57910000                           | SBP | 5.45E-06 | Chr5:57902163  | rs780345403  | G/A     | 2.94E-05 | 1.35E-02 | 3.29E-05 | UKBB, MVP |
| Chr5:67070001-67090000                           | DBP | 2.70E-05 | Chr5:67086333  | rs114440422  | A/G     | 3.80E-03 | 1.52E-01 | 2.19E-05 | UKBB, MVP |
| Chr5:72090001-72110000                           | DBP | 3.81E-05 | Chr5:72108931  | rs868778481  | T/G     | 2.64E-04 | 2.58E-03 | 6.93E-04 | NA        |
| Chr5:88000001-88020000                           | DBP | 8.81E-05 | Chr5:88001000  | rs114144963  | T/C     | 9.23E-03 | 1.53E-03 | 3.60E-03 | UKBB, MVP |
| Chr7:90860001-90880000                           | DBP | 8.07E-05 | Chr7:90863943  | rs371264131  | T/G     | 5.58E-04 | 2.04E-03 | 3.02E-03 | NA        |

|                           |     |          |                 |              |       |          |          |          |           |
|---------------------------|-----|----------|-----------------|--------------|-------|----------|----------|----------|-----------|
| Chr7:90860001-90880000    | DBP | 8.07E-05 | Chr7:90864174   | rs1030911105 | A/T   | 2.94E-04 | 1.08E-02 | 3.40E-04 | NA        |
| Chr8:137320001-137340000  | DBP | 1.46E-05 | Chr8:137337574  | rs141392410  | G/A   | 5.21E-03 | 6.33E-01 | 1.46E-06 | MVP       |
| Chr8:137330001-137350000  | DBP | 1.06E-05 | Chr8:137337574  | rs141392410  | G/A   | 5.21E-03 | 3.84E-01 | 1.46E-06 | MVP       |
| Chr8:122390001-122410000  | SBP | 3.94E-05 | Chr8:122408882  | rs367736389  | G/T   | 5.87E-05 | 9.05E-01 | 8.45E-06 | MVP       |
| Chr9:23130001-23150000    | HTN | 2.98E-05 | Chr9:23142518   | rs564818044  | A/G   | 3.79E-03 | 2.97E-01 | 4.72E-06 | UKBB      |
| Chr9:23140001-23160000    | HTN | 3.31E-05 | Chr9:23142518   | rs564818044  | A/G   | 3.79E-03 | 2.57E-01 | 4.72E-06 | UKBB      |
| Chr9:29800001-29820000    | HTN | 9.43E-05 | Chr9:29801378   | rs1371954572 | G/T   | 9.80E-05 | 7.12E-01 | 2.21E-05 | NA        |
| Chr10:65280001-65300000   | HTN | 3.91E-05 | Chr10:65299666  | rs7093615    | C/A   | 9.10E-03 | 5.58E-02 | 1.85E-04 | UKBB, MVP |
| Chr10:13090001-13110000   | SBP | 4.21E-05 | Chr10:13098598  | rs550006396  | C/T   | 8.81E-05 | 3.76E-01 | 1.42E-05 | MVP       |
| Chr11:44770001-44790000   | DBP | 7.72E-05 | Chr11:44777625  | rs189859777  | T/G   | 1.82E-03 | 2.41E-02 | 4.74E-04 | UKBB, MVP |
| Chr11:61730001-61750000   | DBP | 7.56E-05 | Chr11:61746842  | rs983334527  | G/A   | 7.83E-04 | 1.04E-03 | 1.14E-02 | UKBB      |
| Chr11:61730001-61750000   | DBP | 7.56E-05 | Chr11:61746887  | rs746100983  | C/CTA | 7.15E-04 | 4.63E-03 | 2.89E-03 | UKBB      |
| Chr11:73950001-73970000   | DBP | 3.18E-05 | Chr11:73964917  | rs139317756  | G/T   | 1.55E-03 | 7.31E-03 | 4.13E-04 | UKBB      |
| Chr11:73950001-73970000   | DBP | 3.18E-05 | Chr11:73969282  | rs140556652  | A/G   | 1.44E-03 | 1.70E-03 | 2.32E-03 | UKBB, MVP |
| Chr12:50070001-50090000   | HTN | 2.82E-05 | Chr12:50081692  | rs140894777  | G/A   | 7.59E-03 | 1.68E-03 | 4.65E-03 | UKBB, MVP |
| Chr12:50080001-50100000   | HTN | 9.66E-05 | Chr12:50081692  | rs140894777  | G/A   | 7.59E-03 | 2.73E-03 | 4.65E-03 | UKBB, MVP |
| Chr12:50070001-50090000   | HTN | 2.82E-05 | Chr12:50086319  | rs139120093  | T/G   | 2.75E-03 | 2.96E-03 | 1.23E-03 | UKBB, MVP |
| Chr12:50080001-50100000   | HTN | 9.66E-05 | Chr12:50086319  | rs139120093  | T/G   | 2.75E-03 | 8.22E-03 | 1.23E-03 | UKBB, MVP |
| Chr12:113090001-113110000 | SBP | 6.93E-06 | Chr12:113105737 | rs142556970  | G/A   | 1.86E-03 | 3.12E-04 | 1.32E-03 | UKBB, MVP |
|                           |     |          | Chr12:113501009 | rs755099793  | A/G   | 1.96E-04 |          | 9.53E-04 | UKBB      |
| Chr12:113490001-113510000 | HTN | 8.71E-05 | Chr12:113501133 | rs1469796200 | T/G   | 1.96E-04 | 8.04E-03 | 9.53E-04 | NA        |
|                           |     |          | Chr12:113505779 | rs147740157  | T/C   | 2.25E-04 |          | 7.72E-03 | UKBB      |
| Chr13:50510001-50530000   | DBP | 5.23E-05 | Chr13:50522634  | rs562185001  | A/T   | 3.13E-04 | 5.82E-02 | 8.23E-05 | MVP       |
| Chr14:18320001-18340000   | HTN | 2.59E-05 | Chr14:18333823  | rs564618809  | T/G   | 2.94E-05 | 9.92E-01 | 5.61E-06 | NA        |
| Chr15:38380001-38400000   | DBP | 8.63E-05 | Chr15:38398323  | rs755289280  | T/C   | 9.79E-05 | 1.48E-03 | 6.96E-03 | NA        |
| Chr15:38380001-38400000   | DBP | 8.63E-05 | Chr15:38398386  | rs145063865  | A/G   | 4.70E-04 | 1.53E-03 | 4.03E-03 | UKBB      |
| Chr15:47480001-47500000   | DBP | 9.55E-05 | Chr15:47494978  | rs564740962  | T/G   | 1.08E-04 | 3.35E-03 | 1.49E-04 | UKBB      |
| Chr15:47480001-47500000   | DBP | 9.55E-05 | Chr15:47496058  | rs181561558  | G/C   | 6.17E-04 | 1.12E-03 | 9.57E-04 | MVP       |
| Chr15:41570001-41590000   | HTN | 4.89E-05 | Chr15:41570322  | rs146237670  | A/G   | 6.18E-04 | 6.72E-03 | 1.66E-03 | UKBB      |
| Chr15:48270001-48290000   | HTN | 3.86E-05 | Chr15:48279516  | rs896510696  | C/A   | 2.55E-04 | 1.02E-02 | 1.36E-04 | NA        |
| Chr17:70430001-70450000   | SBP | 2.92E-05 | Chr17:70438250  | rs182046693  | A/G   | 6.36E-04 | 8.46E-01 | 3.49E-06 | UKBB, MVP |
| Chr18:76450001-76470000   | HTN | 5.74E-05 | Chr18:76450108  | rs566120109  | G/T   | 7.84E-05 | 8.39E-03 | 1.45E-03 | NA        |
| Chr18:76450001-76470000   | HTN | 5.74E-05 | Chr18:76451735  | rs75564345   | G/A   | 3.31E-03 | 5.34E-03 | 1.92E-03 | NA        |
| Chr19:21150001-21170000   | SBP | 2.80E-05 | Chr19:21151200  | rs145645636  | T/C   | 9.47E-03 | 7.04E-03 | 2.34E-04 | UKBB, MVP |



Chr22:34420001-34440000      DBP      9.84E-05      Chr22:34433540      rs534864747      T/C      4.50E-04      4.81E-02      1.74E-04      UKBB

---

AAF, alternative allele frequency; DBP, diastolic blood pressure (BP); HTN, hypertension; LOO, leave-One-Out; MVP, Million Veteran Program; SBP, systolic BP; SMMAT-E, variant set mixed model association test - Efficient hybrid.; SVA, single variant analysis; UKBB, UK Biobank.

\* Identified in gene-based analyses of exonic loss-of-function, missense, and protein altering insertion-deletion variants. † Identified in gene-based analyses of regulatory regions and exonic variants with predicted functional relevance. ‡ Identified in gene-based analyses of high confidence loss-of-function variants.

**Table S15.** SNVs identified by leave-one-out analyses of aggregate rare variant units with SMMAT-E  $P < 1E-04$  in participants of African ancestry.

| Aggregate Unit                                   | Associated Trait | SMMAT-E P-value | Marker         | rsID        | Alleles (Alt/Ref) | AAF      | LOO P-value | SVA P-value | Stage-2 Sample Availability |
|--------------------------------------------------|------------------|-----------------|----------------|-------------|-------------------|----------|-------------|-------------|-----------------------------|
| <i>Gene-based Analyses</i>                       |                  |                 |                |             |                   |          |             |             |                             |
| AGTRAP<br>(Chr1:11736085-11750771)*              | SBP              | 9.70E-05        | Chr1:11750140  | rs17875960  | T/C               | 1.35E-03 | 5.21E-02    | 4.74E-04    | MVP                         |
| LEXM<br>(Chr1:54806063-54842264) <sup>†</sup>    | DBP              | 3.20E-05        | Chr1:54810479  | rs187674266 | T/C               | 2.88E-03 | 6.77E-01    | 6.57E-06    | MVP,<br>REGARDS             |
|                                                  |                  |                 | Chr1:54810596  | rs377560726 | G/C               | 2.95E-03 |             | 3.83E-06    | NA                          |
| ERBB4<br>(Chr2:211375717-212538802) <sup>‡</sup> | HTN              | 6.50E-05        | Chr2:211725173 | rs148992844 | G/T               | 1.28E-03 | 6.91E-01    | 4.08E-06    | MVP,<br>REGARDS             |
| MCIDAS<br>(Chr5:55218791-55227315) <sup>†</sup>  | DBP              | 1.89E-05        | Chr5:55220484  | rs561481156 | A/G               | 1.24E-03 | 7.35E-04    | 3.04E-03    | MVP,<br>REGARDS             |
| MCIDAS<br>(Chr5:55218791-55227315) <sup>†</sup>  | DBP              | 1.89E-05        | Chr5:55227016  | rs186341559 | T/C               | 1.20E-03 | 3.48E-04    | 8.43E-03    | MVP                         |
| PLAT<br>(Chr8:42174718-42207565) <sup>‡</sup>    | DBP              | 4.11E-05        | Chr8:42178946  | rs61755432  | G/C               | 4.01E-04 | 6.06E-04    | 1.54E-02    | MVP                         |
| PLAT<br>(Chr8:42174718-42207565) <sup>‡</sup>    | DBP              | 4.11E-05        | Chr8:42180509  | rs140012141 | T/C               | 2.19E-04 | 2.42E-03    | 2.35E-04    | MVP                         |
| BLNK<br>(Chr10:96189171-96271576) <sup>‡</sup>   | HTN              | 9.49E-05        | Chr10:96230820 | rs148249957 | T/C               | 8.42E-04 | 1.88E-02    | 4.14E-04    | NA                          |
| GOLT1B<br>(Chr12:21501176-21518408) <sup>‡</sup> | DBP              | 3.15E-05        | Chr12:21512311 | rs34378602  | A/G               | 4.74E-04 | 8.32E-03    | 1.27E-04    | MVP                         |
| G6PC3<br>(Chr17:44070700-44076344)*              | HTN              | 1.15E-05        | Chr17:44075766 | rs763408993 | A/G               | 1.10E-04 | 9.77E-01    | 9.77E-01    | NA                          |
| WDR87<br>(Chr19:37884577-37906617) <sup>†</sup>  | SBP              | 7.67E-05        | Chr19:37906500 | rs982829890 | C/T               | 2.92E-04 | 2.86E-02    | 2.64E-04    | MVP                         |
|                                                  |                  |                 | Chr19:37906499 | rs934092610 | A/C               | 2.92E-04 |             | 2.64E-04    | NA                          |
| WDR87<br>(Chr19:37884577-37906617) <sup>†</sup>  | DBP              | 3.84E-05        | Chr19:37906500 | rs982829890 | C/T               | 2.92E-04 | 5.51E-03    | 2.09E-04    | MVP                         |
|                                                  |                  |                 | Chr19:37906499 | rs934092610 | A/C               | 2.92E-04 |             | 2.09E-04    | NA                          |

|                                                  |     |          |                |              |     |          |          |          |                 |
|--------------------------------------------------|-----|----------|----------------|--------------|-----|----------|----------|----------|-----------------|
| GTPBP1<br>(Chr22:38704561-38738265) <sup>†</sup> | SBP | 8.79E-05 | Chr22:38730743 | rs201889482  | G/C | 2.63E-03 | 7.06E-03 | 6.04E-04 | REGARDS         |
| <i>Sliding Windows Analyses</i>                  |     |          |                |              |     |          |          |          |                 |
| Chr1:54800001-54820000                           | DBP | 2.04E-05 | Chr1:54810479  | rs187674266  | T/C | 2.88E-03 | 4.66E-01 | 6.57E-06 | MVP, REGARDS    |
|                                                  |     |          | Chr1:54810596  | rs377560726  | G/C | 2.95E-03 |          | 3.83E-06 | NA              |
| Chr1:54810001-54830000                           | DBP | 2.04E-05 | Chr1:54810479  | rs187674266  | T/C | 2.88E-03 | 4.84E-01 | 6.57E-06 | MVP, REGARDS    |
|                                                  |     |          | Chr1:54810596  | rs377560726  | G/C | 2.95E-03 |          | 3.83E-06 | NA              |
| Chr2:67990001-68010000                           | DBP | 2.23E-05 | Chr2:67991717  | rs186944582  | C/T | 6.20E-04 | 5.12E-03 | 4.68E-04 | MVP             |
| Chr2:49510001-49530000                           | HTN | 8.68E-06 | Chr2:49514339  | rs185293219  | A/T | 8.79E-04 | 1.06E-04 | 2.00E-02 | NA              |
| Chr2:49510001-49530000                           | HTN | 8.68E-06 | Chr2:49516603  | rs951053055  | C/A | 9.89E-04 | 3.25E-04 | 5.52E-03 | NA              |
| Chr2:183010001-183030000                         | HTN | 6.29E-05 | Chr2:18302497  | rs560702795  | A/G | 1.83E-04 | 1.27E-01 | 1.74E-05 | NA              |
| Chr2:211710001-211730000                         | HTN | 3.04E-05 | Chr2:211725173 | rs148992844  | G/T | 1.28E-03 | 5.18E-01 | 4.08E-06 | MVP, REGARDS    |
| Chr2:211720001-211740000                         | HTN | 1.25E-05 | Chr2:211725173 | rs148992844  | G/T | 1.28E-03 | 3.56E-01 | 4.08E-06 | MVP, REGARDS    |
| Chr2:67990001-68010000                           | SBP | 6.29E-05 | Chr2:67991717  | rs186944582  | C/T | 6.20E-04 | 1.51E-03 | 5.05E-03 | MVP             |
| Chr2:67990001-68010000                           | SBP | 6.29E-05 | Chr2:67997967  | rs62143849   | T/G | 9.92E-03 | 3.23E-03 | 2.02E-03 | MVP,<br>REGARDS |
| Chr2:137760001-137780000                         | SBP | 9.05E-05 | Chr2:137770284 | rs189500544  | G/A | 4.52E-03 | 5.73E-01 | 2.51E-05 | MVP,<br>REGARDS |
| Chr2:137770001-137790000                         | SBP | 7.97E-05 | Chr2:137770284 | rs189500544  | G/A | 4.52E-03 | 3.79E-01 | 2.51E-05 | MVP,<br>REGARDS |
| Chr3:88430001-88450000                           | DBP | 7.04E-05 | Chr3:88441450  | rs73140398   | C/T | 6.49E-03 | 2.10E-01 | 1.65E-05 | MVP, REGARDS    |
| Chr3:88440001-88460000                           | DBP | 6.66E-05 | Chr3:88441450  | rs73140398   | C/T | 6.49E-03 | 1.86E-01 | 1.65E-05 | MVP, REGARDS    |
| Chr3:19030001-19050000                           | HTN | 1.46E-05 | Chr3:19043301  | rs114748767  | T/C | 6.96E-04 | 1.42E-02 | 2.44E-01 | NA              |
| Chr3:59310001-59330000                           | SBP | 9.30E-05 | Chr3:59314770  | rs147047791  | G/A | 9.85E-03 | 7.24E-02 | 1.55E-04 | MVP,<br>REGARDS |
| Chr4:22930001-22950000                           | DBP | 2.80E-06 | Chr4:22946729  | rs538084432  | C/A | 3.25E-03 | 1.17E-02 | 3.52E-05 | MVP, REGARDS    |
| Chr4:22940001-22960000                           | DBP | 1.52E-05 | Chr4:22946729  | rs538084432  | C/A | 3.25E-03 | 5.06E-02 | 3.52E-05 | MVP, REGARDS    |
| Chr5:55220001-55240000                           | DBP | 3.48E-05 | Chr5:55220484  | rs561481156  | A/G | 0.00124  | 9.56E-04 | 3.04E-03 | MVP,<br>REGARDS |
| Chr5:178790001-178810000                         | DBP | 4.11E-05 | Chr5:178797566 | rs56393219   | C/T | 5.36E-03 | 1.47E-01 | 6.82E-05 | MVP,<br>REGARDS |
| Chr5:117320001-117340000                         | SBP | 7.04E-05 | Chr5:117321344 | rs1011005843 | C/A | 3.65E-04 | 4.00E-02 | 2.73E-04 | MVP             |
| Chr5:139350001-139370000                         | SBP | 3.87E-05 | Chr5:139369019 | rs992889791  | G/A | 3.65E-04 | 3.07E-01 | 5.99E-06 | MVP             |
| Chr6:43880001-43900000                           | DBP | 6.77E-05 | Chr6:43886163  | rs575546272  | A/G | 1.50E-03 | 1.00E-01 | 7.31E-05 | MVP, REGARDS    |

|                           |     |          |                 |              |                  |          |          |          |              |
|---------------------------|-----|----------|-----------------|--------------|------------------|----------|----------|----------|--------------|
| Chr6:43710001-43730000    | SBP | 8.64E-05 | Chr6:43716303   | rs927672578  | T/C              | 1.82E-04 | 1.24E-03 | 5.46E-02 | NA           |
| Chr6:43880001-43900000    | SBP | 5.54E-05 | Chr6:43888614   | rs187143472  | A/G              | 1.46E-04 | 9.71E-02 | 3.44E-01 | NA           |
| Chr7:156150001-156170000  | HTN | 4.04E-06 | Chr7:156151808  | rs370654804  | A/G              | 1.83E-04 | 2.44E-02 | 3.96E-06 | NA           |
| Chr7:156150001-156170000  | HTN | 4.04E-06 | Chr7:156151872  | rs951619037  | G/T              | 1.46E-04 | 3.68E-04 | 1.84E-03 | NA           |
| Chr7:33750001-33770000    | SBP | 5.02E-05 | Chr7:33768785   | rs145533052  | T/A              | 0.001677 | 1.75E-02 | 4.16E-04 | NA           |
|                           |     |          | Chr7:33768926   | rs140330896  | G/A              | 0.001677 |          | 4.16E-04 | NA           |
| Chr8:63740001-63760000    | HTN | 5.57E-05 | Chr8:63750032   | rs117550253  | G/A              | 3.70E-03 | 1.00E-03 | 5.77E-03 | REGARDS      |
| Chr8:79850001-79870000    | SBP | 4.52E-05 | Chr8:79864885   | rs1361009224 | T/C              | 2.19E-04 | 1.53E-02 | 1.28E-04 | MVP          |
| Chr9:68530001-68550000    | SBP | 2.96E-05 | Chr9:68540871   | rs967141166  | C/G              | 3.65E-04 | 1.13E-03 | 1.76E-03 | MVP          |
| Chr10:79080001-79100000   | DBP | 9.48E-05 | Chr10:79093901  | rs376054383  | A/G              | 2.59E-03 | 3.41E-03 | 1.60E-03 | MVP, REGARDS |
| Chr10:125420001-125440000 | HTN | 2.72E-07 | Chr10:125430074 | .            | T/TTATAACAATTAGA |          | 1.18E-01 | 1.95E-10 | NA           |
| Chr10:79090001-79110000   | SBP | 6.43E-05 | Chr10:79093901  | rs376054383  | A/G              | 2.59E-03 | 3.24E-03 | 2.25E-03 | MVP, REGARDS |
| Chr10:79090001-79110000   | SBP | 6.43E-05 | Chr10:79093991  | rs181444929  | A/C              | 2.63E-03 | 1.14E-03 | 4.55E-03 | MVP, REGARDS |
| Chr12:67060001-67080000   | HTN | 6.85E-05 | Chr12:67069886  | rs940692929  | T/G              | 1.46E-04 | 3.19E-03 | 1.09E-03 | NA           |
| Chr12:67060001-67080000   | HTN | 6.85E-05 | Chr12:67078940  | rs910612640  | G/A              | 3.30E-04 | 1.09E-03 | 3.19E-03 | NA           |
|                           |     |          | Chr12:113501009 | rs755099793  | A/G              | 0.000696 |          | 7.83E-04 | NA           |
| Chr12:113490001-113510000 | HTN | 1.69E-05 | Chr12:113501133 | rs1469796200 | T/G              | 0.000696 | 3.02E-03 | 7.84E-04 | NA           |
|                           |     |          | Chr12:113505779 | rs147740157  | T/C              | 0.000696 |          | 7.84E-04 | NA           |
| Chr13:50510001-50530000   | DBP | 2.45E-05 | Chr13:50522634  | rs562185001  | A/T              | 1.09E-03 | 6.68E-02 | 5.46E-05 | MVP          |
| Chr13:65880001-65900000   | SBP | 5.57E-05 | Chr13:65893301  | rs190642412  | G/A              | 9.85E-04 | 5.40E-03 | 1.98E-03 | MVP, REGARDS |
| Chr13:65890001-65910000   | SBP | 8.76E-05 | Chr13:65893301  | rs190642412  | G/A              | 9.85E-04 | 9.05E-03 | 1.98E-03 | MVP, REGARDS |
| Chr14:65870001-65890000   | SBP | 7.06E-05 | Chr14:65881012  | rs966803342  | G/A              | 1.46E-04 | 1.17E-02 | 6.55E-04 | MVP          |
| Chr14:65870001-65890000   | SBP | 7.06E-05 | Chr14:65881049  | rs1290317159 | T/C              | 1.09E-04 | 8.53E-03 | 4.89E-04 | MVP          |
| Chr16:86900001-86920000   | HTN | 4.17E-05 | Chr16:86910821  | rs139148897  | G/A              | 7.14E-03 | 6.48E-04 | 1.25E-02 | REGARDS      |
| Chr16:86900001-86920000   | HTN | 4.17E-05 | Chr16:86919817  | rs566276270  | T/G              | 3.48E-03 | 1.48E-02 | 2.12E-04 | REGARDS      |
| Chr16:86910001-86930000   | HTN | 1.54E-05 | Chr16:86910821  | rs139148897  | G/A              | 7.14E-03 | 2.75E-04 | 1.25E-02 | REGARDS      |
| Chr16:86910001-86930000   | HTN | 1.54E-05 | Chr16:86919817  | rs566276270  | T/G              | 3.48E-03 | 5.81E-03 | 2.12E-04 | REGARDS      |
| Chr16:7200001-7220000     | SBP | 7.65E-05 | Chr16:7206559   | rs554538972  | G/C              | 6.53E-03 | 1.94E-01 | 3.46E-05 | MVP, REGARDS |
| Chr19:3630001-3650000     | DBP | 5.30E-05 | Chr19:3641786   | rs148921132  | C/T              | 4.01E-04 | 1.16E-03 | 7.34E-03 | MVP          |
| Chr19:18770001-18790000   | SBP | 9.68E-05 | Chr19:18789554  | rs868041658  | A/G              | 1.93E-03 | 1.12E-01 | 7.79E-05 | MVP, REGARDS |
| Chr20:10390001-10410000   | DBP | 4.18E-05 | Chr20:10405335  | rs372944937  | C/A              | 4.38E-04 | 3.11E-02 | 3.11E-07 | MVP          |
| Chr21:29560001-29580000   | SBP | 7.55E-05 | Chr21:29579574  | rs528525042  | G/A              | 7.66E-04 | 4.77E-01 | 1.93E-05 | MVP          |

AAF, alternative allele frequency; DBP, diastolic blood pressure (BP); HTN, hypertension; LOO, leave-One-Out; MVP, Million Veteran Program; SBP, systolic BP; SMMAT-E, variant set mixed model association test - Efficient hybrid.; SVA, single variant analysis; UKBB, UK Biobank.

\* Identified in gene-based analyses of high confidence loss-of-function variants. † Identified in gene-based analyses of regulatory regions and exonic variants with predicted functional relevance. ‡ Identified in gene-based analyses of exonic loss-of-function, missense, and protein altering insertion-deletion variants.

**Table S16.** SNVs identified by leave-one-out analyses of aggregate rare variant units with SMMAT-E  $P < 1E-04$  in participants of Asian ancestry.

| Aggregate Unit                                  | Associated Trait | SMMAT-E P-value | Marker         | rsID         | Alleles (Alt/Ref) | AAF      | LOO P-value | SVA P-value | Stage-2 Sample Availability |
|-------------------------------------------------|------------------|-----------------|----------------|--------------|-------------------|----------|-------------|-------------|-----------------------------|
| <i>Gene-based Analyses</i>                      |                  |                 |                |              |                   |          |             |             |                             |
| PLA2G2D<br>(Chr1:20111939-20119566)*            | DBP              | 1.04E-05        | Chr1:20119457  | rs200435430  | C/A               | 2.25E-03 | 4.50E-01    | 5.27E-05    | NA                          |
| ZFYVE9<br>(Chr1:52142001-52348664) <sup>†</sup> | SBP              | 2.27E-05        | Chr1:52237880  | rs759041526  | A/C               | 9.25E-04 | 1.35E-03    | 2.46E-03    | NA                          |
| ZFYVE9<br>(Chr1:52142001-52348664) <sup>†</sup> | SBP              | 2.27E-05        | Chr1:52278519  | rs751858399  | G/A               | 1.32E-03 | 2.18E-03    | 1.56E-03    | NA                          |
| ORC4<br>(Chr2:147930396-148021604)*             | DBP              | 3.37E-05        | Chr2:147958805 | rs138317624  | C/T               | 6.61E-03 | 3.00E-03    | 6.66E-04    | NA                          |
| PDLIM5<br>(Chr4:94451857-94668227) <sup>†</sup> | DBP              | 2.87E-05        | Chr4:94455353  | rs75841704   | G/A               | 3.97E-04 | 4.43E-04    | 1.40E-02    | NA                          |
| PDLIM5<br>(Chr4:94451857-94668227) <sup>†</sup> | DBP              | 2.87E-05        | Chr4:94523782  | rs749144218  | A/G               | 5.29E-04 | 4.52E-04    | 1.42E-02    | NA                          |
| PDLIM5<br>(Chr4:94451857-94668227) <sup>†</sup> | DBP              | 2.87E-05        | Chr4:94587018  | rs746639901  | A/C               | 6.61E-04 | 1.53E-03    | 3.38E-03    | NA                          |
| PACS1<br>(Chr11:66070272-66244744) <sup>†</sup> | DBP              | 6.86E-05        | Chr11:66216143 | rs773415096  | T/G               | 3.97E-04 | 1.81E-01    | 4.08E-05    | NA                          |
| GCDH<br>(Chr19:12891129-12915345)*              | DBP              | 7.20E-05        | Chr19:12894791 | rs1199960037 | C/G               | 2.91E-03 | 2.38E-01    | 1.80E-05    | NA                          |
| SYCE2<br>(Chr19:12898229-12919674)*             | DBP              | 8.63E-05        | Chr19:12894791 | rs1199960037 | C/G               | 2.91E-03 | 2.57E-01    | 1.80E-05    | NA                          |
| KIF3B<br>(Chr20:32277651-32335011)*             | SBP              | 1.41E-07        | Chr20:32309709 | rs1393521306 | G/C               | 1.06E-03 | 1.90E-06    | 3.61E-03    | NA                          |
| KIF3B<br>(Chr20:32277651-32335011)*             | SBP              | 1.41E-07        | Chr20:32311097 | rs758426820  | A/G               | 9.25E-04 | 7.79E-03    | 6.25E-07    | NA                          |
| KIF3B<br>(Chr20:32277651-32335011) <sup>†</sup> | SBP              | 8.81E-07        | Chr20:32311097 | rs758426820  | A/G               | 9.25E-04 | 6.41E-02    | 6.25E-07    | NA                          |

Sliding Windows Analyses

|                          |     |          |                |              |         |          |          |          |    |
|--------------------------|-----|----------|----------------|--------------|---------|----------|----------|----------|----|
| Chr1:20100001-20120000   | DBP | 1.04E-05 | Chr1:20119457  | rs200435430  | C/A     | 2.25E-03 | 4.50E-01 | 3.09E-06 | NA |
| Chr1:91330001-91350000   | HTN | 2.09E-06 | Chr1:91343440  | rs759737721  | T/G     | 5.29E-04 | 1.61E-03 | 2.40E-05 | NA |
| Chr1:91340001-91360000   | HTN | 3.37E-06 | Chr1:91343440  | rs759737721  | T/G     | 5.29E-04 | 5.57E-03 | 2.40E-05 | NA |
| Chr1:91330001-91350000   | HTN | 2.09E-06 | Chr1:91347482  | rs576342909  | A/T     | 6.61E-04 | 8.23E-05 | 5.42E-04 | NA |
| Chr1:91340001-91360000   | HTN | 3.37E-06 | Chr1:91347482  | rs576342909  | A/T     | 6.61E-04 | 2.76E-04 | 5.42E-04 | NA |
| Chr1:110680001-110700000 | SBP | 9.45E-06 | Chr1:110688867 | rs1198157802 | A/G     | 1.45E-03 | 1.63E-04 | 1.33E-02 | NA |
| Chr1:110680001-110700000 | SBP | 9.45E-06 | Chr1:110697306 | rs375447719  | G/A     | 2.25E-03 | 2.20E-02 | 8.67E-05 | NA |
| Chr1:172090001-172110000 | HTN | 5.23E-05 | Chr1:172109590 | rs1435289259 | G/T     | 1.45E-03 | 7.68E-02 | 5.25E-05 | NA |
| Chr1:223780001-223800000 | SBP | 9.12E-05 | Chr1:223799909 | rs756133979  | T/C     | 5.29E-04 | 7.67E-02 | 3.55E-05 | NA |
| Chr2:155630001-155650000 | DBP | 8.04E-05 | Chr2:155643289 | rs1206485253 | T/G     | 1.32E-03 | 3.82E-01 | 3.73E-07 | NA |
| Chr3:12250001-12270000   | DBP | 9.76E-05 | Chr3:12264248  | rs945462322  | T/G     | 6.61E-04 | 2.43E-02 | 6.67E-04 | NA |
| Chr3:12250001-12270000   | DBP | 9.76E-05 | Chr3:12267974  | rs1211914898 | T/G     | 3.97E-04 | 2.56E-03 | 3.58E-03 | NA |
| Chr4:58130001-58150000   | HTN | 8.63E-05 | Chr4:58136852  | rs142264842  | T/G     | 5.02E-03 | 5.86E-01 | 1.75E-05 | NA |
| Chr4:133140001-133160000 | SBP | 5.12E-05 | Chr4:133153900 | rs1468781808 | C/T     | 3.97E-04 | 8.12E-04 | 4.21E-03 | NA |
| Chr5:69310001-69330000   | SBP | 1.19E-05 | Chr5:69313828  | rs1295351182 | A/G     | 7.93E-04 | 4.94E-02 | 2.26E-05 | NA |
| Chr6:110080001-110100000 | HTN | 7.07E-05 | Chr6:110099957 | rs910798455  | C/T     | 3.97E-04 | 2.69E-01 | 2.47E-05 | NA |
| Chr6:129290001-129310000 | SBP | 7.44E-05 | Chr6:129293066 | rs1391821039 | A/G     | 3.97E-04 | 3.04E-01 | 2.36E-05 | NA |
| Chr7:18840001-18860000   | SBP | 6.08E-05 | Chr7:18842339  | rs1374997232 | G/A     | 1.19E-03 | 6.15E-03 | 1.83E-03 | NA |
| Chr7:18840001-18860000   | SBP | 6.08E-05 | Chr7:18859501  | rs1396276058 | T/C     | 5.29E-04 | 1.23E-03 | 6.23E-03 | NA |
| Chr7:36430001-36450000   | HTN | 6.85E-05 | Chr7:36443846  | rs1432523754 | T/A     | 3.97E-04 | 9.61E-02 | 9.56E-05 | NA |
| Chr7:41660001-41680000   | SBP | 2.84E-05 | Chr7:41668653  | rs536958510  | G/C     | 7.93E-04 | 4.69E-04 | 2.20E-03 | NA |
| Chr7:41660001-41680000   | SBP | 2.84E-05 | Chr7:41669933  | rs148140557  | T/C     | 3.97E-04 | 7.34E-03 | 1.20E-04 | NA |
| Chr7:41660001-41680000   | DBP | 4.76E-05 | Chr7:41669933  | rs148140557  | T/C     | 3.97E-04 | 8.58E-03 | 1.18E-04 | NA |
| Chr8:65490001-65510000   | DBP | 4.91E-05 | Chr8:65490278  | rs190587924  | G/C     | 1.19E-03 | 5.98E-04 | 1.87E-02 | NA |
| Chr8:65490001-65510000   | DBP | 4.91E-05 | Chr8:65509625  | rs1265424902 | C/T     | 9.25E-04 | 5.57E-03 | 1.24E-03 | NA |
| Chr8:96340001-96360000   | SBP | 4.86E-05 | Chr8:96359351  | rs570616203  | T/G     | 5.29E-04 | 5.15E-04 | 2.11E-02 | NA |
| Chr8:96340001-96360000   | SBP | 4.86E-05 | Chr8:96359680  | .            | C/CTTAA | 5.29E-04 | 9.98E-03 | 2.04E-04 | NA |
| Chr8:116210001-116230000 | HTN | 9.00E-05 | Chr8:116224549 | .            | C/CAA   | 5.29E-04 | 3.61E-02 | 1.19E-04 | NA |
| Chr8:116220001-116240000 | HTN | 3.97E-06 | Chr8:116224549 | .            | C/CAA   | 5.29E-04 | 6.09E-03 | 1.19E-04 | NA |
| Chr8:116210001-116230000 | DBP | 7.43E-05 | Chr8:116229791 | rs1310952515 | G/A     | 3.97E-04 | 2.36E-02 | 1.43E-04 | NA |
| Chr8:116220001-116240000 | HTN | 3.97E-06 | Chr8:116232111 | rs1317238220 | T/A     | 3.97E-04 | 9.00E-05 | 8.79E-03 | NA |
| Chr11:95690001-95710000  | HTN | 2.01E-05 | Chr11:95705633 | rs927733621  | C/T     | 1.06E-03 | 4.45E-01 | 3.97E-06 | NA |
| Chr12:45900001-45920000  | DBP | 8.43E-05 | Chr12:45905513 | rs75082213   | A/G     | 6.87E-03 | 8.38E-02 | 6.74E-05 | NA |

|                           |     |          |                 |              |           |          |          |          |    |
|---------------------------|-----|----------|-----------------|--------------|-----------|----------|----------|----------|----|
| Chr12:102950001-102970000 | SBP | 5.45E-05 | Chr12:102958346 | rs756714075  | G/GGCCGAG | 2.91E-03 | 2.57E-03 | 8.99E-04 | NA |
| Chr13:80100001-80120000   | SBP | 3.87E-05 | Chr13:80118780  | .            | T/C       | 5.29E-04 | 3.91E-04 | 1.17E-04 | NA |
| Chr13:80110001-80130000   | SBP | 8.11E-05 | Chr13:80118780  | .            | T/C       | 5.29E-04 | 4.32E-02 | 1.17E-04 | NA |
| Chr13:83680001-83700000   | SBP | 2.55E-05 | Chr13:83696204  | rs926387159  | T/G       | 1.59E-03 | 7.52E-01 | 2.95E-06 | NA |
| Chr13:83690001-83710000   | SBP | 1.94E-05 | Chr13:83696204  | rs926387159  | T/G       | 1.59E-03 | 7.55E-01 | 2.95E-06 | NA |
| Chr14:39140001-39160000   | HTN | 3.88E-05 | Chr14:39157757  | rs985705479  | C/A       | 5.29E-04 | 9.90E-04 | 1.04E-03 | NA |
| Chr14:39140001-39160000   | HTN | 3.88E-05 | Chr14:39157760  | rs1166238367 | A/G       | 5.29E-04 | 1.04E-03 | 9.90E-04 | NA |
| Chr14:97240001-97260000   | HTN | 8.20E-05 | Chr14:97247305  | rs1267061427 | A/C       | 3.97E-04 | 2.05E-01 | 3.30E-05 | NA |
| Chr15:38390001-38410000   | DBP | 9.58E-05 | Chr15:38398323  | rs755289280  | T/C       | 1.32E-03 | 2.84E-03 | 6.91E-03 | NA |
| Chr15:38390001-38410000   | DBP | 9.58E-05 | Chr15:38398386  | rs145063865  | A/G       | 6.34E-03 | 3.13E-03 | 2.86E-03 | NA |
| Chr15:68330001-68350000   | HTN | 2.42E-05 | Chr15:68331038  | rs745366518  | C/T       | 6.61E-04 | 2.56E-01 | 1.49E-05 | NA |
| Chr17:64920001-64940000   | SBP | 5.71E-05 | Chr17:64928536  | rs1170505050 | A/G       | 3.97E-04 | 2.04E-03 | 5.99E-03 | NA |
| Chr17:64920001-64940000   | SBP | 5.71E-05 | Chr17:64932751  | rs973806913  | G/A       | 4.63E-03 | 1.32E-03 | 2.35E-02 | NA |
| Chr17:64920001-64940000   | SBP | 5.71E-05 | Chr17:64936519  | rs1182086796 | T/C       | 3.97E-04 | 1.43E-03 | 8.80E-03 | NA |
| Chr19:39780001-39800000   | SBP | 6.19E-05 | Chr19:39793314  | rs1327798939 | A/G       | 1.98E-03 | 1.64E-01 | 4.21E-05 | NA |
| Chr20:32300001-32320000   | SBP | 3.23E-08 | Chr20:32309709  | rs1393521306 | G/C       | 1.06E-03 | 5.51E-07 | 3.61E-03 | NA |
| Chr20:32300001-32320000   | SBP | 3.23E-08 | Chr20:32311097  | rs758426820  | A/G       | 9.25E-04 | 1.76E-03 | 6.25E-07 | NA |
| Chr20:32310001-32330000   | SBP | 5.51E-07 | Chr20:32311097  | rs758426820  | A/G       | 9.25E-04 | 3.90E-02 | 6.25E-07 | NA |

AAF, alternative allele frequency; DBP, diastolic blood pressure (BP); HTN, hypertension; LOO, leave-One-Out; MVP, Million Veteran Program; SBP, systolic BP; SMMAT-E, variant set mixed model association test - Efficient hybrid.; SVA, single variant analysis; UKBB, UK Biobank.

\* Identified in gene-based analyses of regulatory regions and exonic variants with predicted functional relevance. † Identified in gene-based analyses of exonic loss-of-function, missense, and protein altering insertion-deletion variants.



**Table S17.** SNVs identified by leave-one-out analyses of aggregate rare variant units with SMMAT-E  $P < 1E-04$  in participants of European ancestry.

| Aggregate Unit                                                    | Associated Trait | SMMAT-E P-value | Marker          | rsID        | Alleles (Alt/Ref) | AAF      | LOO P-value | SVA P-value | Stage-2 Sample Availability |
|-------------------------------------------------------------------|------------------|-----------------|-----------------|-------------|-------------------|----------|-------------|-------------|-----------------------------|
| <i>Gene-based Analyses</i>                                        |                  |                 |                 |             |                   |          |             |             |                             |
| AMY2B<br>(Chr1:103554644-103579534) <sup>‡</sup>                  | HTN              | 4.27E-05        | Chr1:103575270  | rs140209167 | C/T               | 2.71E-03 | 1.53E-02    | 3.97E-04    | UKBB, MVP, REGARDS          |
| RBM45<br>(Chr2:178112409-178129656) <sup>‡</sup>                  | SBP              | 1.01E-05        | Chr2:178112560  | rs371141654 | A/G               | 3.19E-04 | 1.31E-04    | 9.16E-03    | UKBB                        |
| RBM45<br>(Chr2:178112409-178129656) <sup>‡</sup>                  | SBP              | 1.01E-05        | Chr2:178123596  | rs199636679 | G/C               | 3.36E-04 | 1.94E-02    | 3.59E-05    | UKBB                        |
| GPR156<br>(Chr3:120165481-120285074) <sup>†</sup>                 | DBP              | 5.51E-05        | Chr3:120167323  | rs751263400 | A/AG              | 1.59E-04 | 4.26E-01    | 1.87E-05    | UKBB                        |
| RNF175<br>(Chr4:153710125-153760983) <sup>‡</sup>                 | SBP              | 8.25E-05        | Chr4:153748694  | rs116158953 | A/G               | 3.47E-03 | 2.41E-01    | 4.17E-05    | UKBB, MVP, REGARDS          |
| GATS<br>(Chr7:100187988-100272274) <sup>*</sup>                   | DBP              | 4.35E-05        | Chr7:100271832  | rs3735244   | T/G               | 2.40E-03 | 1.46E-01    | 9.14E-06    | UKBB, REGARDS               |
| OR9N1P<br>(Chr7:141911402-141912022) <sup>‡</sup>                 | SBP              | 1.38E-05        | Chr7:141907810  | rs148829987 | C/A               | 3.54E-04 | 5.04E-02    | 3.78E-05    | UKBB, MVP                   |
| OR9N1P<br>(Chr7:141911402-141912022) <sup>‡</sup>                 | SBP              | 1.38E-05        | Chr7:141911897  | rs782787616 | C/G               | 3.19E-04 | 2.33E-04    | 1.31E-02    | UKBB                        |
| STAG3L5P-PVRIG2P-PILRB<br>(Chr7:100336065-100367831) <sup>*</sup> | DBP              | 3.98E-05        | Chr7:100350450  | rs12668834  | T/C               | 2.53E-03 | 5.28E-01    | 9.00E-06    | UKBB, REGARDS               |
| STAG3L5P<br>(Chr7:100336079-100341328) <sup>*</sup>               | DBP              | 3.24E-05        | Chr7:100350450  | rs12668834  | T/C               | 2.53E-03 | 4.48E-01    | 9.00E-06    | UKBB, REGARDS               |
| PVRIG2P<br>(Chr7:100352318-100353936) <sup>*</sup>                | DBP              | 1.89E-05        | Chr7:100350450  | rs12668834  | T/C               | 2.53E-03 | 1.72E-01    | 9.00E-06    | UKBB, REGARDS               |
| PILRB<br>(Chr7:100358003-100367831) <sup>*</sup>                  | DBP              | 2.41E-05        | Chr7:100350450  | rs12668834  | T/C               | 2.53E-03 | 2.63E-01    | 9.00E-06    | UKBB, REGARDS               |
| TDRD1<br>(Chr10:114174442-114232669) <sup>‡</sup>                 | HTN              | 4.57E-05        | Chr10:114222689 | rs373299815 | A/G               | 1.06E-04 | 4.88E-04    | 6.60E-03    | NA                          |
| NDRG2<br>(Chr14:21016763-21070872) <sup>*</sup>                   | DBP              | 6.08E-05        | Chr14:21024215  | rs147773754 | T/C               | 4.27E-03 | 3.65E-01    | 2.37E-05    | UKBB, MVP, REGARDS          |

|                                                 |     |          |                |              |            |          |          |          |                       |
|-------------------------------------------------|-----|----------|----------------|--------------|------------|----------|----------|----------|-----------------------|
| TPPP2<br>(Chr14:21024262-21036352)*<br>DAND5    | DBP | 4.70E-05 | Chr14:21024215 | rs147773754  | T/C        | 4.27E-03 | 3.06E-01 | 2.37E-05 | UKBB, MVP,<br>REGARDS |
| (Chr19:12969618-12974753) <sup>†</sup><br>DAND5 | DBP | 7.48E-05 | Chr19:12969623 | rs749251252  | G/GGACA    | 1.59E-04 | 5.61E-03 | 1.18E-03 | UKBB                  |
| (Chr19:12969618-12974753) <sup>†</sup><br>BPI   | DBP | 7.48E-05 | Chr19:12973453 | rs768842269  | CCT/C      | 5.31E-05 | 1.77E-03 | 3.09E-03 | NA                    |
| (Chr20:38304150-38337505) <sup>†</sup><br>ERG   | HTN | 8.45E-05 | Chr20:38304261 | rs1304485169 | C/CCCTGATG | 5.31E-05 | 1.52E-02 | 1.05E-04 | UKBB                  |
| (Chr21:38367261-38661783) <sup>‡</sup><br>ERG   | DBP | 3.28E-05 | Chr21:38383633 | rs201647507  | C/G        | 1.06E-04 | 5.84E-04 | 9.77E-03 | UKBB                  |
| (Chr21:38367261-38661783) <sup>‡</sup><br>ERG   | DBP | 3.28E-05 | Chr21:38383852 | rs1407239004 | C/T        | 7.08E-05 | 2.36E-03 | 8.88E-04 | NA                    |
| (Chr21:38367261-38661783) <sup>‡</sup><br>TST   | DBP | 3.28E-05 | Chr21:38445536 | rs993206522  | A/G        | 5.31E-05 | 3.34E-04 | 1.21E-02 | NA                    |
| (Chr22:37010859-37020183) <sup>‡</sup>          | DBP | 3.43E-05 | Chr22:37018363 | rs147266371  | T/C        | 3.54E-04 | 6.02E-01 | 5.94E-06 | UKBB, MVP             |
| <i>Sliding Windows Analyses</i>                 |     |          |                |              |            |          |          |          |                       |
| Chr1:2450001-2470000                            | HTN | 4.34E-05 | Chr1:2456028   | rs754544624  | A/G        | 3.36E-04 | 8.83E-03 | 3.32E-04 | UKBB                  |
| Chr1:28460001-28480000                          | SBP | 3.68E-05 | Chr1:28460181  | rs1034026250 | A/T        | 8.85E-05 | 5.97E-03 | 3.24E-04 | UKBB                  |
| Chr1:28460001-28480000                          | SBP | 3.68E-05 | Chr1:28473767  | rs202061695  | A/C        | 7.08E-05 | 1.01E-03 | 2.27E-03 | NA                    |
| Chr1:94540001-94560000                          | HTN | 9.72E-05 | Chr1:94552963  | rs841698     | C/T        | 9.97E-01 | 7.59E-01 | 1.94E-05 | UKBB,<br>REGARDS      |
| Chr1:185910001-185930000                        | DBP | 2.76E-05 | Chr1:185928650 | rs149707772  | T/C        | 4.43E-04 | 2.98E-01 | 9.86E-06 | UKBB, MVP             |
| Chr1:99220001-99240000                          | SBP | 8.42E-05 | Chr1:99228032  | rs918472343  | T/C        | 7.08E-05 | 2.15E-05 | 8.31E-01 | NA                    |
|                                                 |     |          | Chr1:99229826  | rs947408596  | T/A        | 7.09E-05 |          | 8.31E-01 | NA                    |
| Chr1:99220001-99240000                          | SBP | 8.42E-05 | Chr1:99233610  | rs1187632768 | A/G        | 1.06E-04 | 3.36E-01 | 8.59E-06 | UKBB                  |
| Chr1:99230001-99250000                          | SBP | 3.87E-05 | Chr1:99233610  | rs1187632768 | A/G        | 1.06E-04 | 9.31E-01 | 8.59E-06 | UKBB                  |
| Chr2:50370001-50390000                          | DBP | 8.15E-05 | Chr2:50387686  | rs1018246038 | T/G        | 3.54E-04 | 1.38E-01 | 7.80E-05 | NA                    |
| Chr2:10750001-10770000                          | HTN | 6.06E-05 | Chr2:10764334  | rs1012427631 | G/A        | 5.31E-05 | 4.77E-01 | 6.06E-05 | UKBB                  |
| Chr2:174360001-174380000                        | DBP | 7.02E-05 | Chr2:174371708 | rs777425878  | C/T        | 5.13E-04 | 4.60E-02 | 1.11E-04 | UKBB                  |
| Chr3:41020001-41040000                          | HTN | 8.92E-05 | Chr3:41035135  | rs1018569216 | G/A        | 7.08E-05 | 6.69E-01 | 1.77E-05 | UKBB                  |
| Chr3:130510001-130530000                        | DBP | 4.43E-05 | Chr3:130527375 | rs184717230  | C/G        | 4.07E-04 | 7.94E-04 | 1.76E-03 | UKBB, MVP             |
| Chr3:130510001-130530000                        | DBP | 4.43E-05 | Chr3:130527376 | rs147702642  | G/A        | 2.92E-03 | 6.68E-04 | 7.17E-03 | UKBB,<br>REGARDS      |

|                          |     |          |                |              |            |          |          |          |                       |
|--------------------------|-----|----------|----------------|--------------|------------|----------|----------|----------|-----------------------|
| Chr3:130520001-130540000 | DBP | 3.90E-05 | Chr3:130527375 | rs184717230  | C/G        | 4.07E-04 | 7.26E-04 | 1.76E-03 | UKBB, MVP             |
| Chr3:130520001-130540000 | DBP | 3.90E-05 | Chr3:130527376 | rs147702642  | G/A        | 2.92E-03 | 5.43E-04 | 7.17E-03 | UKBB,<br>REGARDS      |
| Chr4:124730001-124750000 | DBP | 2.33E-05 | Chr4:124746752 | rs1050104610 | C/T        | 1.06E-03 | 6.02E-01 | 5.62E-06 | UKBB                  |
| Chr4:124740001-124760000 | DBP | 1.56E-05 | Chr4:124746752 | rs1050104610 | C/T        | 1.06E-03 | 4.78E-01 | 5.62E-06 | UKBB                  |
| Chr4:154050001-154070000 | DBP | 4.51E-05 | Chr4:154069962 | rs938675698  | C/A        | 7.08E-05 | 2.27E-01 | 2.02E-05 | UKBB                  |
| Chr4:181230001-181250000 | DBP | 7.92E-05 | Chr4:181248738 | rs759992627  | A/T        | 2.41E-03 | 4.60E-03 | 1.25E-03 | NA                    |
| Chr5:117760001-117780000 | HTN | 2.41E-05 | Chr5:117778836 | rs759302724  | T/C        | 1.59E-04 | 1.12E-03 | 2.09E-03 | UKBB                  |
| Chr5:117760001-117780000 | HTN | 2.41E-05 | Chr5:117779028 | .            | T/TTCCCCAG | 1.06E-04 | 3.87E-03 | 9.07E-05 | UKBB                  |
| Chr5:127520001-127540000 | SBP | 1.75E-05 | Chr5:127524529 | rs1441444936 | G/A        | 5.31E-05 | 2.46E-04 | 7.10E-03 | UKBB                  |
| Chr5:127520001-127540000 | SBP | 1.75E-05 | Chr5:127524870 | rs143589506  | A/G        | 1.01E-03 | 5.43E-04 | 4.35E-03 | UKBB, MVP             |
| Chr5:172040001-172060000 | SBP | 6.51E-05 | Chr5:172054563 | rs113551500  | G/C        | 7.61E-04 | 2.57E-01 | 1.43E-05 | REGARDS               |
| Chr5:172050001-172070000 | SBP | 4.29E-05 | Chr5:172054563 | rs113551500  | G/C        | 7.61E-04 | 2.57E-01 | 1.43E-05 | REGARDS               |
| Chr7:100340001-100360000 | DBP | 2.41E-05 | Chr7:100350450 | rs12668834   | T/C        | 2.53E-03 | 2.63E-01 | 9.00E-06 | UKBB,<br>REGARDS      |
| Chr7:133790001-133810000 | DBP | 1.93E-05 | Chr7:133796902 | rs1008392627 | T/G        | 2.48E-04 | 1.92E-04 | 1.49E-03 | NA                    |
| Chr7:133790001-133810000 | DBP | 1.93E-05 | Chr7:133797239 | rs530457484  | G/C        | 3.19E-03 | 2.54E-04 | 1.35E-03 | UKBB, MVP,<br>REGARDS |
| Chr7:141900001-141920000 | SBP | 3.99E-05 | Chr7:141907810 | rs148829987  | C/A        | 3.54E-04 | 8.17E-02 | 3.78E-05 | UKBB, MVP             |
| Chr7:141900001-141920000 | SBP | 3.99E-05 | Chr7:141911897 | rs782787616  | C/G        | 3.19E-04 | 4.10E-04 | 1.31E-02 | UKBB                  |
| Chr8:49730001-49750000   | HTN | 3.64E-05 | Chr8:49740597  | rs539490305  | C/A        | 1.24E-04 | 1.52E-03 | 3.19E-03 | UKBB                  |
| Chr8:49730001-49750000   | HTN | 3.64E-05 | Chr8:49741293  | rs767681164  | T/A        | 5.31E-05 | 1.03E-03 | 3.69E-03 | UKBB                  |
| Chr8:83600001-83620000   | DBP | 1.38E-05 | Chr8:83616239  | rs755777228  | C/A        | 2.30E-04 | 7.34E-03 | 1.82E-04 | UKBB                  |
| Chr8:83600001-83620000   | DBP | 1.38E-05 | Chr8:83616240  | rs779635706  | G/C        | 1.06E-04 | 1.72E-04 | 9.00E-03 | UKBB                  |
| Chr9:23130001-23150000   | HTN | 9.27E-05 | Chr9:23142518  | rs564818044  | A/G        | 5.59E-03 | 2.54E-01 | 2.44E-05 | UKBB, MVP,<br>REGARDS |
| Chr9:23140001-23160000   | HTN | 1.54E-05 | Chr9:23142518  | rs564818044  | A/G        | 5.59E-03 | 3.40E-02 | 2.44E-05 | UKBB, MVP,<br>REGARDS |
| Chr9:23140001-23160000   | SBP | 6.48E-05 | Chr9:23142518  | rs564818044  | A/G        | 5.59E-03 | 5.77E-02 | 1.08E-04 | UKBB, MVP,<br>REGARDS |
| Chr9:125950001-125970000 | SBP | 8.11E-05 | Chr9:125950190 | rs180914843  | T/C        | 1.36E-03 | 1.37E-03 | 2.72E-03 | NA                    |
| Chr9:125950001-125970000 | SBP | 8.11E-05 | Chr9:125964158 | rs181459338  | A/G        | 1.26E-03 | 2.24E-03 | 8.88E-04 | NA                    |
| Chr10:16900001-16920000  | DBP | 1.10E-05 | Chr10:16900636 | rs141737312  | A/G        | 1.22E-03 | 2.89E-04 | 7.34E-03 | UKBB, MVP,<br>REGARDS |

|                           |     |          |                 |             |     |          |          |          |                       |
|---------------------------|-----|----------|-----------------|-------------|-----|----------|----------|----------|-----------------------|
| Chr10:16900001-16920000   | DBP | 1.10E-05 | Chr10:16919996  | rs2271460   | C/A | 5.91E-03 | 1.02E-03 | 1.97E-03 | UKBB, MVP,<br>REGARDS |
| Chr10:16990001-17010000   | DBP | 9.69E-05 | Chr10:16990468  | rs771763775 | T/C | 5.31E-05 | 1.81E-03 | 8.90E-03 | UKBB                  |
| Chr10:16990001-17010000   | DBP | 9.69E-05 | Chr10:17006929  | rs771728408 | T/C | 8.85E-05 | 2.33E-03 | 8.45E-03 | UKBB                  |
| Chr10:85480001-85500000   | DBP | 5.65E-05 | Chr10:85490510  | rs191823543 | C/T | 1.06E-04 | 4.97E-03 | 1.88E-03 | UKBB                  |
| Chr10:85480001-85500000   | DBP | 5.65E-05 | Chr10:85490511  | rs147538650 | C/G | 5.32E-05 | 9.48E-04 | 6.30E-03 | UKBB                  |
| Chr10:98310001-98330000   | DBP | 3.18E-05 | Chr10:98326572  | rs574886265 | G/A | 2.83E-04 | 4.05E-02 | 1.59E-04 | UKBB                  |
| Chr11:7670001-7690000     | DBP | 9.34E-05 | Chr11:7675742   | rs7130592   | T/C | 3.84E-03 | 6.76E-02 | 3.25E-05 | UKBB,<br>REGARDS      |
| Chr11:31950001-31970000   | SBP | 6.71E-05 | Chr11:31969443  | rs886110723 | C/T | 8.32E-04 | 3.78E-01 | 1.70E-05 | UKBB                  |
| Chr11:31960001-31980000   | SBP | 7.08E-05 | Chr11:31969443  | rs886110723 | C/T | 8.32E-04 | 4.28E-01 | 1.70E-05 | UKBB                  |
| Chr12:103130001-103150000 | HTN | 6.90E-05 | Chr12:103147959 | rs192926117 | C/A | 3.97E-03 | 6.17E-02 | 3.37E-05 | UKBB                  |
| Chr12:103140001-103160000 | HTN | 6.92E-05 | Chr12:103147959 | rs192926117 | C/A | 3.97E-03 | 5.53E-02 | 3.37E-05 | UKBB                  |
| Chr13:39670001-39690000   | DBP | 9.13E-05 | Chr13:39687612  | rs34555836  | T/C | 7.08E-05 | 3.22E-02 | 3.01E-05 | UKBB, MVP             |
| Chr13:85800001-85820000   | SBP | 3.28E-05 | Chr13:85800049  | rs9602841   | G/T | 4.43E-04 | 4.46E-01 | 9.04E-06 | UKBB                  |
| Chr13:85800001-85820000   | DBP | 9.00E-05 | Chr13:85800049  | rs9602841   | G/T | 4.43E-04 | 9.74E-02 | 9.04E-06 | NA                    |
| Chr13:85800001-85820000   | HTN | 3.39E-05 | Chr13:85800049  | rs9602841   | G/T | 4.43E-04 | 1.94E-01 | 9.04E-06 | NA                    |
| Chr13:106210001-106230000 | DBP | 2.40E-05 | Chr13:106212621 | rs181084228 | C/T | 3.63E-03 | 1.91E-03 | 1.63E-03 | REGARDS               |
| Chr13:106210001-106230000 | DBP | 2.40E-05 | Chr13:106212932 | rs190645521 | A/C | 2.16E-03 | 5.45E-03 | 3.60E-04 | REGARDS               |
| Chr14:21010001-21030000   | DBP | 7.67E-05 | Chr14:21024215  | rs147773754 | T/C | 4.27E-03 | 5.82E-01 | 2.37E-05 | UKBB, MVP,<br>REGARDS |
| Chr14:21020001-21040000   | DBP | 6.74E-05 | Chr14:21024215  | rs147773754 | T/C | 4.27E-03 | 3.26E-01 | 2.37E-05 | UKBB, MVP,<br>REGARDS |
| Chr14:90360001-90380000   | DBP | 9.73E-05 | Chr14:90366809  | rs182881580 | T/G | 7.21E-03 | 2.18E-03 | 4.24E-03 | UKBB, MVP,<br>REGARDS |
| Chr15:45870001-45890000   | HTN | 6.70E-05 | Chr15:45884394  | rs761729326 | A/G | 1.06E-04 | 7.34E-03 | 1.85E-03 | UKBB                  |
| Chr15:45870001-45890000   | HTN | 6.70E-05 | Chr15:45884567  | rs992870969 | A/T | 5.31E-05 | 8.05E-04 | 1.38E-02 | NA                    |
| Chr15:67440001-67460000   | HTN | 2.08E-05 | Chr15:67457164  | rs184474917 | C/T | 1.93E-03 | 5.62E-01 | 5.40E-06 | UKBB,<br>REGARDS      |
| Chr15:67440001-67460000   | SBP | 6.64E-05 | Chr15:67457164  | rs184474917 | C/T | 1.93E-03 | 9.33E-01 | 1.50E-05 | UKBB,<br>REGARDS      |
| Chr15:67450001-67470000   | HTN | 3.42E-06 | Chr15:67457164  | rs184474917 | C/T | 1.93E-03 | 4.29E-02 | 5.40E-06 | UKBB,<br>REGARDS      |

|                         |     |          |                |              |     |          |          |          |                  |
|-------------------------|-----|----------|----------------|--------------|-----|----------|----------|----------|------------------|
| Chr15:67450001-67470000 | SBP | 1.41E-05 | Chr15:67457164 | rs184474917  | C/T | 1.93E-03 | 9.82E-02 | 1.50E-05 | UKBB,<br>REGARDS |
| Chr15:73990001-74010000 | HTN | 4.62E-05 | Chr15:73992202 | rs199911341  | A/G | 2.66E-04 | 7.16E-02 | 5.87E-05 | UKBB             |
| Chr16:9660001-9680000   | DBP | 7.34E-05 | Chr16:9679372  | rs1032414483 | T/G | 2.66E-04 | 5.78E-02 | 4.98E-05 | UKBB             |
| Chr16:9670001-9690000   | DBP | 8.62E-05 | Chr16:9679372  | rs1032414483 | T/G | 2.66E-04 | 2.21E-01 | 4.98E-05 | UKBB             |
| Chr19:35430001-35450000 | SBP | 8.48E-05 | Chr19:35449824 | rs369914056  | A/G | 1.24E-04 | 4.63E-01 | 3.05E-06 | UKBB             |
| Chr22:37000001-37020000 | DBP | 4.12E-05 | Chr22:37018363 | rs147266371  | T/C | 3.54E-04 | 6.68E-01 | 5.94E-06 | UKBB, MVP        |

AAF, alternative allele frequency; DBP, diastolic blood pressure (BP); HTN, hypertension; LOO, leave-One-Out; MVP, Million Veteran Program; SBP, systolic BP; SMMAT-E, variant set mixed model association test - Efficient hybrid.; SVA, single variant analysis; UKBB, UK Biobank.

\* Identified in gene-based analyses of exonic loss-of-function, missense, and protein altering insertion-deletion variants. † Identified in gene-based analyses of high confidence loss-of-function variants. ‡ Identified in gene-based analyses of regulatory regions and exonic variants with predicted functional relevance.

**Table S18.** SNVs identified by leave-one-out analyses of aggregate rare variant units with SMMAT-E  $P < 1E-04$  in participants of Hispanic ancestry.

| Aggregate Unit                                    | Associated Trait | SMMAT-E P-value | Marker         | rsID        | Alleles (Alt/Ref) | AAF      | LOO P-value | SVA P-value | Stage-2 Sample Availability |
|---------------------------------------------------|------------------|-----------------|----------------|-------------|-------------------|----------|-------------|-------------|-----------------------------|
| <i>Gene-based Analyses</i>                        |                  |                 |                |             |                   |          |             |             |                             |
| LYSMD1<br>(Chr1:151148496-151165902)*             | SBP              | 1.44E-05        | Chr1:151170527 | rs11800088  | C/T               | 4.16E-03 | 2.94E-02    | 1.25E-05    | NA                          |
| CACNA2D3<br>(Chr3:54122552-55074557) <sup>†</sup> | HTN              | 8.59E-05        | Chr3:54891399  | rs112362995 | T/C               | 3.56E-03 | 3.02E-03    | 1.38E-03    | MVP                         |
| CACNA2D3<br>(Chr3:54122552-55074557) <sup>†</sup> | HTN              | 8.59E-05        | Chr3:55009388  | rs142687394 | T/G               | 3.19E-03 | 1.43E-02    | 2.09E-04    | MVP                         |
| MRPS18B<br>(Chr6:30617320-30626393) <sup>†</sup>  | DBP              | 4.09E-05        | Chr6:30625588  | rs564504951 | C/G               | 3.67E-04 | 6.03E-01    | 1.02E-05    | NA                          |
| FLOT1<br>(Chr6:30727709-30742851)*                | DBP              | 9.36E-05        | Chr6:30724399  | .           | G/GC              | 6.12E-04 | 1.55E-01    | 8.36E-05    | NA                          |
| TUBB<br>(Chr6:30720201-30725426)*                 | DBP              | 3.95E-06        | Chr6:30720412  | rs113155531 | A/C               | 3.67E-04 | 8.36E-05    | 1.72E-03    | NA                          |
| TUBB<br>(Chr6:30720201-30725426)*                 | SBP              | 1.86E-05        | Chr6:30720412  | rs113155531 | A/C               | 3.67E-04 | 5.73E-04    | 1.05E-03    | NA                          |
| TUBB<br>(Chr6:30720201-30725426)*                 | DBP              | 3.95E-06        | Chr6:30724399  | .           | G/GC              | 6.12E-04 | 1.72E-03    | 8.36E-05    | NA                          |
| TUBB<br>(Chr6:30720201-30725426)*                 | SBP              | 1.86E-05        | Chr6:30724399  | .           | G/GC              | 6.12E-04 | 1.05E-03    | 5.73E-04    | NA                          |
| MSC<br>(Chr8:71841542-71844496)*                  | SBP              | 6.19E-05        | Chr8:71843161  | rs76011963  | G/A               | 9.30E-03 | 5.85E-02    | 8.89E-05    | MVP                         |
| SMC2<br>(Chr9:104093760-104141419)*               | SBP              | 7.43E-05        | Chr9:104095548 | rs181793444 | G/C               | 4.04E-03 | 2.81E-01    | 3.25E-06    | MVP                         |
| SMC2<br>(Chr9:104093760-104141419) <sup>†</sup>   | SBP              | 6.56E-05        | Chr9:104095548 | rs181793444 | G/C               | 4.04E-03 | 2.53E-01    | 3.25E-06    | MVP                         |
| SMC2-AS1<br>(Chr9:104080024-104092474)*           | SBP              | 3.20E-05        | Chr9:104095548 | rs181793444 | G/C               | 4.04E-03 | 9.21E-01    | 3.25E-06    | MVP                         |

|                                     |     |          |                |             |         |          |          |          |     |
|-------------------------------------|-----|----------|----------------|-------------|---------|----------|----------|----------|-----|
| RAB15<br>(Chr14:64945816-64972336)* | SBP | 6.48E-05 | Chr14:64942749 |             | T/G     |          | 5.39E-02 |          | NA  |
| DNAH9<br>(Chr17:11598470-11970168)* | SBP | 2.76E-05 | Chr17:11894431 | rs78870819  | T/C     | 3.06E-03 | 3.19E-04 | 3.43E-03 | MVP |
| <i>Sliding Windows Analyses</i>     |     |          |                |             |         |          |          |          |     |
| Chr1:25020001-25040000              | HTN | 4.40E-05 | Chr1:25031885  | rs183101733 | G/T     | 3.67E-03 | 2.32E-02 | 4.89E-05 | MVP |
| Chr1:25020001-25040000              | DBP | 9.29E-05 | Chr1:25031885  | rs183101733 | G/T     | 3.67E-03 | 8.34E-02 | 8.82E-05 | MVP |
| Chr1:86630001-86650000              | DBP | 4.42E-06 | Chr1:86643872  | rs138352629 | A/G     | 1.22E-03 | 6.47E-05 | 3.39E-03 | MVP |
| Chr1:86640001-86660000              | DBP | 1.78E-06 | Chr1:86643872  | rs138352629 | A/G     | 1.22E-03 | 4.11E-05 | 3.39E-03 | MVP |
| Chr1:86630001-86650000              | DBP | 4.42E-06 | Chr1:86647783  | rs115221669 | A/G     | 4.53E-03 | 2.93E-02 | 2.73E-05 | MVP |
| Chr1:86640001-86660000              | DBP | 1.78E-06 | Chr1:86647783  | rs115221669 | A/G     | 4.53E-03 | 5.70E-03 | 2.73E-05 | MVP |
| Chr2:146430001-146450000            | HTN | 2.65E-05 | Chr2:146440972 | rs116735556 | G/A     | 3.44E-03 | 6.97E-04 | 4.29E-03 | MVP |
| Chr2:197000001-197020000            | SBP | 1.91E-05 | Chr2:197007954 | rs368155784 | T/A     | 4.89E-04 | 2.37E-03 | 4.03E-04 | NA  |
| Chr2:197000001-197020000            | HTN | 1.67E-05 | Chr2:197015132 | rs116000415 | C/G     | 7.46E-03 | 1.72E-02 | 2.37E-03 | MVP |
| Chr2:197000001-197020000            | SBP | 1.91E-05 | Chr2:197015132 | rs116000415 | C/G     | 7.46E-03 | 4.03E-04 | 6.78E-05 | MVP |
| Chr3:20001-40000                    | SBP | 8.29E-06 | Chr3:21615     | rs557900814 | G/C     | 3.59E-04 | 4.33E-04 | 1.57E-03 | NA  |
| Chr3:20001-40000                    | SBP | 8.29E-06 | Chr3:21683     | rs192545714 | C/G     | 7.34E-04 | 1.43E-04 | 4.40E-03 | NA  |
| Chr3:20001-40000                    | SBP | 8.29E-06 | Chr3:31808     | rs565142363 | G/A     | 3.59E-04 | 4.33E-04 | 1.57E-03 | NA  |
| Chr4:34510001-34530000              | DBP | 6.03E-05 | Chr4:34529522  | rs73130132  | G/T     | 3.18E-03 | 1.33E-01 | 7.12E-05 | MVP |
| Chr4:122920001-122940000            | SBP | 4.58E-05 | Chr4:122922409 | rs201814451 | T/C     | 7.34E-04 | 1.18E-02 | 2.68E-04 | NA  |
| Chr4:122920001-122940000            | SBP | 4.58E-05 | Chr4:122936160 | rs752274594 | C/CTCTT | 3.67E-04 | 9.11E-04 | 4.43E-03 | NA  |
| Chr5:61820001-61840000              | DBP | 3.76E-05 | Chr5:61832411  | rs77933963  | A/T     | 6.12E-03 | 3.74E-02 | 1.13E-04 | MVP |
| Chr5:61830001-61850000              | DBP | 1.92E-05 | Chr5:61832411  | rs77933963  | A/T     | 6.12E-03 | 1.34E-02 | 1.13E-04 | MVP |
| Chr5:61820001-61840000              | DBP | 3.76E-05 | Chr5:61833029  | rs112075463 | C/T     | 3.91E-03 | 6.88E-04 | 1.70E-02 | MVP |
| Chr5:61830001-61850000              | DBP | 1.92E-05 | Chr5:61833029  | rs112075463 | C/T     | 3.91E-03 | 2.26E-04 | 1.70E-02 | MVP |
| Chr5:74150001-74170000              | SBP | 4.83E-05 | Chr5:74164320  | rs975948    | G/A     | 4.28E-03 | 1.58E-03 | 1.29E-03 | NA  |
| Chr5:74150001-74170000              | SBP | 4.83E-05 | Chr5:74169815  | rs188297906 | T/C     | 2.32E-03 | 5.78E-04 | 4.54E-03 | NA  |
| Chr5:127470001-127490000            | SBP | 8.34E-05 | Chr5:127477345 | rs182251332 | A/G     | 7.34E-04 | 6.44E-01 | 2.03E-05 | MVP |
| Chr6:30720001-30740000              | DBP | 5.47E-06 | Chr6:30720412  | rs113155531 | A/C     | 3.67E-04 | 9.56E-05 | 1.72E-03 | NA  |
| Chr6:30720001-30740000              | SBP | 6.66E-05 | Chr6:30720412  | rs113155531 | A/C     | 3.67E-04 | 1.77E-03 | 1.05E-03 | NA  |
| Chr6:30720001-30740000              | DBP | 5.47E-06 | Chr6:30724399  | .           | G/GC    | 6.12E-04 | 1.48E-03 | 8.36E-05 | NA  |
| Chr6:30720001-30740000              | SBP | 6.66E-05 | Chr6:30724399  | .           | G/GC    | 6.12E-04 | 2.85E-03 | 5.73E-04 | NA  |
| Chr6:139830001-139850000            | DBP | 3.53E-05 | Chr6:139847207 | rs192664048 | A/G     | 3.91E-03 | 3.63E-02 | 6.16E-05 | MVP |
| Chr6:139830001-139850000            | DBP | 3.53E-05 | Chr6:139846741 | rs537444215 | G/A     | 1.47E-03 | 3.69E-04 | 1.05E-02 | MVP |

|                          |     |          |                |              |        |          |          |          |     |
|--------------------------|-----|----------|----------------|--------------|--------|----------|----------|----------|-----|
| Chr6:139840001-139860000 | DBP | 2.39E-05 | Chr6:139846741 | rs537444215  | G/A    | 1.47E-03 | 2.69E-04 | 1.05E-02 | MVP |
| Chr6:139840001-139860000 | DBP | 2.39E-05 | Chr6:139847207 | rs192664048  | A/G    | 3.91E-03 | 2.83E-02 | 6.16E-05 | MVP |
| Chr6:139830001-139850000 | DBP | 3.53E-05 | Chr6:139847287 | rs538591715  | A/C    | 1.47E-03 | 3.69E-04 | 1.05E-02 | MVP |
| Chr6:139840001-139860000 | DBP | 2.39E-05 | Chr6:139847287 | rs538591715  | A/C    | 1.47E-03 | 2.69E-04 | 1.05E-02 | MVP |
| Chr7:18650001-18670000   | DBP | 4.58E-05 | Chr7:18655840  | rs568828254  | G/A    | 6.12E-04 | 6.02E-04 | 9.94E-05 | NA  |
| Chr7:116040001-116060000 | SBP | 5.80E-05 | Chr7:116043118 | rs115804855  | T/A    | 8.57E-04 | 2.58E-03 | 9.74E-04 | MVP |
| Chr7:116040001-116060000 | SBP | 5.80E-05 | Chr7:116043222 | rs114105105  | A/G    | 3.43E-03 | 9.74E-04 | 2.58E-03 | MVP |
| Chr8:71830001-71850000   | SBP | 6.19E-05 | Chr8:71843161  | rs76011963   | G/A    | 9.30E-03 | 5.85E-02 | 8.89E-05 | MVP |
| Chr9:17010001-17030000   | SBP | 3.47E-05 | Chr9:17012533  | rs183551779  | G/T    | 4.65E-03 | 6.45E-04 | 5.30E-03 | NA  |
| Chr9:17010001-17030000   | SBP | 3.47E-05 | Chr9:17025317  | rs573669946  | G/T    | 2.45E-03 | 1.43E-03 | 3.31E-03 | MVP |
| Chr9:81360001-81380000   | SBP | 1.38E-05 | Chr9:81370921  | rs569681992  | A/G    | 1.71E-03 | 9.36E-04 | 3.02E-05 | NA  |
| Chr9:81370001-81390000   | SBP | 3.45E-05 | Chr9:81370921  | rs569681992  | A/G    | 1.71E-03 | 1.03E-03 | 3.02E-05 | NA  |
| Chr9:81360001-81380000   | SBP | 1.38E-05 | Chr9:81374995  | rs140227099  | C/T    | 1.00E-02 | 4.39E-03 | 3.93E-04 | MVP |
| Chr9:81370001-81390000   | SBP | 3.45E-05 | Chr9:81374995  | rs140227099  | C/T    | 1.00E-02 | 6.37E-03 | 3.93E-04 | MVP |
| Chr9:104080001-104100000 | SBP | 2.21E-05 | Chr9:104095548 | rs181793444  | G/C    | 4.04E-03 | 1.55E-01 | 3.25E-06 | MVP |
| Chr9:104090001-104110000 | SBP | 7.68E-06 | Chr9:104095548 | rs181793444  | G/C    | 4.04E-03 | 1.06E-01 | 3.25E-06 | MVP |
| Chr10:1130001-1150000    | DBP | 6.55E-05 | Chr10:1130075  | rs140002716  | C/T    | 3.79E-03 | 9.77E-02 | 9.08E-05 | MVP |
| Chr11:84500001-84520000  | DBP | 5.11E-05 | Chr11:84518735 | rs536612181  | T/A    | 8.56E-04 | 8.16E-01 | 1.21E-05 | NA  |
| Chr13:96860001-96880000  | HTN | 2.33E-05 | Chr13:96863307 | rs181061777  | C/T    | 1.35E-03 | 3.36E-03 | 1.66E-03 | NA  |
| Chr13:96860001-96880000  | HTN | 2.33E-05 | Chr13:96871582 | rs114114288  | C/A    | 8.22E-03 | 5.01E-04 | 2.45E-02 | MVP |
| Chr14:64940001-64960000  | SBP | 6.15E-05 | Chr14:64942749 | rs180757175  | T/G    | 1.59E-03 | 5.44E-02 | 1.88E-04 | NA  |
| Chr16:6610001-6630000    | HTN | 5.60E-05 | Chr16:6625793  | rs77893217   | G/A    | 6.26E-03 | 6.02E-02 | 1.06E-04 | MVP |
| Chr16:22750001-22770000  | SBP | 4.21E-05 | Chr16:22753705 | rs79024532   | C/T    | 4.28E-03 | 2.33E-03 | 1.45E-03 | MVP |
| Chr16:22750001-22770000  | SBP | 4.21E-05 | Chr16:22764683 | rs113577723  | A/G    | 4.89E-04 | 5.70E-04 | 2.40E-05 | NA  |
| Chr17:70420001-70440000  | SBP | 9.98E-05 | Chr17:70438250 | rs182046693  | A/G    | 6.85E-03 | 4.31E-01 | 3.18E-05 | NA  |
| Chr18:38460001-38480000  | SBP | 4.32E-06 | Chr18:38474965 | rs907054029  | A/G    | 2.45E-03 | 9.51E-05 | 5.53E-03 | NA  |
| Chr18:38460001-38480000  | SBP | 4.32E-06 | Chr18:38475076 | rs144770061  | C/CAGG | 7.22E-03 | 1.02E-02 | 9.61E-05 | MVP |
| Chr20:7000001-7020000    | DBP | 2.63E-05 | Chr20:7016079  | rs1009819453 | A/C    | 1.47E-03 | 3.53E-03 | 1.63E-03 | NA  |
| Chr20:12870001-12890000  | DBP | 1.34E-05 | Chr20:12876757 | rs181517230  | G/A    | 6.97E-03 | 4.31E-01 | 4.04E-06 | MVP |
| Chr20:12870001-12890000  | SBP | 1.59E-05 | Chr20:12876757 | rs181517230  | G/A    | 6.97E-03 | 6.65E-01 | 3.88E-06 | MVP |

AAF, alternative allele frequency; DBP, diastolic blood pressure (BP); HTN, hypertension; LOO, leave-One-Out; MVP, Million Veteran Program; SBP, systolic BP; SMMAT-E, variant set mixed model association test - Efficient hybrid.; SVA, single variant analysis; UKBB, UK Biobank.

\* Identified in gene-based analyses of exonic loss-of-function, missense, and protein altering insertion-deletion variants. † Identified in gene-based analyses of regulatory regions and exonic variants with predicted functional relevance.



**Table S19.** SNVs identified by leave-one-out analyses of aggregate rare variant units with SMMAT-E  $P < 1E-04$  in participants of Samoan ancestry.

| Aggregate Unit                        | Associated Trait | SMMAT-E P-value | Marker          | rsID        | Alleles (Alt/Ref) | AAF      | LOO P-value | SVA P-value | Stage-2 Sample |
|---------------------------------------|------------------|-----------------|-----------------|-------------|-------------------|----------|-------------|-------------|----------------|
| <i>Gene-based Analyses</i>            |                  |                 |                 |             |                   |          |             |             |                |
| RASL10B<br>(Chr17:35731639-35743521)* | HTN              | 5.43E-05        | Chr17:35719994  | rs587619480 | C/A               | 1.59E-03 | 7.13E-03    | 9.81E-07    | NA             |
| RASL10B<br>(Chr17:35731639-35743521)* | HTN              | 5.43E-05        | Chr17:35742070  | rs587628312 | A/G               | 1.20E-03 | 2.60E-04    | 4.16E-05    | NA             |
| <i>Sliding Windows Analyses</i>       |                  |                 |                 |             |                   |          |             |             |                |
| Chr13:103160001-103180000             | SBP              | 4.64E-05        | Chr13:103164302 | rs72661412  | G/A               | 2.79E-03 | 6.38E-04    | 9.40E-03    | NA             |
| Chr13:103160001-103180000             | SBP              | 4.64E-05        | Chr13:103179137 | rs17357972  | A/C               | 6.37E-03 | 2.33E-02    | 1.79E-04    | NA             |
| Chr16:50960001-50980000               | SBP              | 5.45E-05        | Chr16:50977026  | rs949641194 | A/G               | 1.19E-03 | 3.63E-01    | 1.06E-05    | NA             |

AAF, alternative allele frequency; DBP, diastolic blood pressure (BP); HTN, hypertension; LOO, leave-One-Out; MVP, Million Veteran Program; SBP,

\* Identified in gene-based analyses of exonic loss-of-function, missense, and protein altering insertion-deletion variants.

**Table S20.** Suggestive signals from meta-analyses of variants identified by single variant analyses ( $5 \times 10^{-8} < P < 1 \times 10^{-6}$ ).

| Chr                                        | Position (GRCh38) | rsID         | Trait | Ancestry | Locus*            | Classification | Alleles (Ref/Alt) | Sample        | AAC | Beta <sup>‡</sup> | SE    | P        |
|--------------------------------------------|-------------------|--------------|-------|----------|-------------------|----------------|-------------------|---------------|-----|-------------------|-------|----------|
| Novel Variants with MAF<1% from Novel Loci |                   |              |       |          |                   |                |                   |               |     |                   |       |          |
| 1                                          | 71055350          | rs1396751049 | SBP   | Multi    | <i>ZRANB2-AS1</i> | Intron         | A/G               | TOPMed/CCDG   | 24  | -21.55            | 4.16  | 2.29E-07 |
|                                            |                   |              |       |          |                   |                |                   | UK Biobank    | 7   | -4.43             | 29.80 | 8.82E-01 |
|                                            |                   |              |       |          |                   |                |                   | Meta-analysis |     | -21.22            | 4.12  | 2.67E-07 |
| 3                                          | 380679            | rs932205533  | DBP   | Multi    | <i>CHL1</i>       | Intron         | C/T               | TOPMed/CCDG   | 12  | 17.01             | 3.38  | 4.89E-07 |
|                                            |                   |              |       |          |                   |                |                   | UK Biobank    | 6   | 61.07             | 22.42 | 6.44E-03 |
|                                            |                   |              |       |          |                   |                |                   | Meta-analysis |     | 17.99             | 3.34  | 7.42E-08 |
| 4                                          | 154348736         | rs892714163  | HTN   | White    | <i>DCHS2</i>      | Intron         | T/C               | TOPMed/CCDG   | 26  | 2.32              | 0.47  | 9.05E-07 |
|                                            |                   |              |       |          |                   |                |                   | UK Biobank    | 27  | 1.04              | 0.75  | 1.66E-01 |
|                                            |                   |              |       |          |                   |                |                   | Meta-analysis |     | 1.95              | 0.40  | 9.86E-07 |
| 7                                          | 93871514          | rs1166654114 | HTN   | Multi    | <i>GNGT1</i>      | Intron         | T/C               | TOPMed/CCDG   | 11  | -3.63             | 0.72  | 4.32E-07 |
|                                            |                   |              |       |          |                   |                |                   | UK Biobank    | 1   | -31.22            | 22.47 | 1.65E-01 |
|                                            |                   |              |       |          |                   |                |                   | Meta-analysis |     | -3.66             | 0.72  | 3.47E-07 |
| 7                                          | 120623195         | rs959927014  | DBP   | Multi    | <i>KCND2</i>      | Intron         | A/T               | TOPMed/CCDG   | 14  | 14.12             | 2.86  | 7.96E-07 |
|                                            |                   |              |       |          |                   |                |                   | UK Biobank    | 3   | 49.71             | 38.11 | 1.92E-01 |
|                                            |                   |              |       |          |                   |                |                   | Meta-analysis |     | 14.32             | 2.85  | 5.17E-07 |
| 7                                          | 120623195         | rs959927014  | DBP   | White    | <i>KCND2</i>      | Intron         | A/T               | TOPMed/CCDG   | 14  | 14.11             | 2.86  | 8.20E-07 |
|                                            |                   |              |       |          |                   |                |                   | UK Biobank    | 3   | 49.71             | 38.11 | 1.92E-01 |
|                                            |                   |              |       |          |                   |                |                   | Meta-analysis |     | 14.31             | 2.85  | 5.32E-07 |

|                                                          |           |             |     |         |                      |            |        |               |    |        |       |          |
|----------------------------------------------------------|-----------|-------------|-----|---------|----------------------|------------|--------|---------------|----|--------|-------|----------|
| 12                                                       | 83815309  | rs561552220 | SBP | White   | <i>RP11-384P14.1</i> | Intergenic | ACTT/A | TOPMed/CCDG   | 17 | -22.82 | 4.63  | 8.17E-07 |
|                                                          |           |             |     |         |                      |            |        | UK Biobank    | 7  | -16.17 | 12.26 | 1.87E-01 |
|                                                          |           |             |     |         |                      |            |        | Meta-analysis |    | -21.99 | 4.33  | 3.79E-07 |
| Novel variants with MAF<1% from Previously Reported Loci |           |             |     |         |                      |            |        |               |    |        |       |          |
| 1                                                        | 36845873  | rs966779519 | HTN | Multi   | <i>GRIK3</i>         | Intron     | T/C    | TOPMed/CCDG   | 26 | -2.48  | 0.49  | 4.66E-07 |
|                                                          |           |             |     |         |                      |            |        | UK Biobank    | 2  | -0.75  | 2.83  | 7.90E-01 |
|                                                          |           |             |     |         |                      |            |        | Meta-analysis |    | -2.43  | 0.48  | 5.42E-07 |
| 1                                                        | 112064726 | rs550856031 | SBP | Multi   | <i>KCND3</i>         | Intergenic | G/C    | TOPMed/CCDG   | 31 | -20.48 | 3.94  | 2.00E-07 |
|                                                          |           |             |     |         |                      |            |        | UK Biobank    | 2  | -32.57 | 75.69 | 6.67E-01 |
|                                                          |           |             |     |         |                      |            |        | Meta-analysis |    | -20.51 | 3.93  | 1.84E-07 |
| 1                                                        | 150513095 | rs12031974  | SBP | Multi   | <i>ECM1</i>          | Intron     | T/C    | TOPMed/CCDG   | 76 | 12.46  | 2.37  | 1.44E-07 |
|                                                          |           |             |     |         |                      |            |        | REGARDS       | 73 | 4.68   | 3.31  | 1.58E-01 |
|                                                          |           |             |     |         |                      |            |        | Meta-analysis |    | 9.82   | 1.93  | 3.40E-07 |
| 1                                                        | 150513095 | rs12031974  | SBP | African | <i>ECM1</i>          | Intron     | T/C    | TOPMed/CCDG   | 74 | 12.59  | 2.39  | 1.39E-07 |
|                                                          |           |             |     |         |                      |            |        | REGARDS       | 73 | 4.68   | 3.31  | 1.58E-01 |
|                                                          |           |             |     |         |                      |            |        | Meta-analysis |    | 9.88   | 1.94  | 3.46E-07 |
| 7                                                        | 73727423  | rs530529907 | DBP | Multi   | <i>ABHD11-AS1</i>    | Intergenic | C/A    | TOPMed/CCDG   | 52 | -8.76  | 1.73  | 4.04E-07 |
|                                                          |           |             |     |         |                      |            |        | UK Biobank    | 6  | -8.53  | 6.73  | 2.05E-01 |
|                                                          |           |             |     |         |                      |            |        | Meta-analysis |    | -8.74  | 1.67  | 1.76E-07 |
| 11                                                       | 30758017  | rs759526273 | SBP | Multi   | <i>DCDC5</i>         | Intergenic | G/A    | TOPMed/CCDG   | 54 | -12.80 | 2.56  | 5.95E-07 |
|                                                          |           |             |     |         |                      |            |        | UK Biobank    | 11 | -9.19  | 6.62  | 1.65E-01 |
|                                                          |           |             |     |         |                      |            |        | Meta-analysis |    | -12.33 | 2.39  | 2.49E-07 |

|    |          |             |     |       |                |            |     |               |    |        |      |                 |
|----|----------|-------------|-----|-------|----------------|------------|-----|---------------|----|--------|------|-----------------|
| 11 | 30758017 | rs759526273 | SBP | White | <i>DCDC5</i>   | Intergenic | G/A | TOPMed/CCDG   | 53 | -13.33 | 2.60 | 2.80E-07        |
|    |          |             |     |       |                |            |     | UK Biobank    | 11 | -9.19  | 6.62 | 1.65E-01        |
|    |          |             |     |       |                |            |     | Meta-analysis |    | -12.78 | 2.42 | 1.24E-07        |
| 16 | 59640176 | rs999280636 | HTN | Multi | <i>DUXAP11</i> | Intergenic | G/A | TOPMed/CCDG   | 14 | -4.06  | 0.71 | <b>1.02E-08</b> |
|    |          |             |     |       |                |            |     | UK Biobank    |    | -0.57  | 0.94 | 5.44E-01        |
|    |          |             |     |       |                |            |     | Meta-analysis |    | -2.79  | 0.57 | 7.82E-07        |

AAC, alternative allele count, corresponding to the specified ancestry group in TOPMed; Alt, alternative; Chr, chromosome; CCDG, Centers for Common Disease Genomics; DBP, diastolic blood pressure (BP); HTN, hypertension; MAF, minor allele frequency; Multi, multi-ancestry; Ref, reference; REGARDS, Reasons for Geographic and Racial Differences in Stroke; SBP, systolic BP; TOPMed, Trans-Omics for Precision Medicine.

\*Gene (if genic) or nearest gene (if intergenic). †Because none of the listed variants were available for replication in MVP, the meta-analysis reflects the combined analysis of TOPMed/CCDG and UK Biobank or REGARDS results only. ‡Beta corresponds to the effect size in mmHg and natural logarithm of the odds ratio per coded allele for the continuous and discrete blood pressure phenotypes, respectively.

**Table S21.** Suggestive signals from meta-analyses of aggregate gene-based analyses ( $P < 1 \times 10^{-4}$ ).

| Gene Symbol                                                                                              | Chr | GRCh38 Position (start, end) | Trait | Ancestry | Sample        | Rare variant sites (N) | Rare alleles (N) | SMMAT-E P-value       |
|----------------------------------------------------------------------------------------------------------|-----|------------------------------|-------|----------|---------------|------------------------|------------------|-----------------------|
| <i>Gene-based analysis (Loss-of-function variants, missense variants, and protein altering indels)</i>   |     |                              |       |          |               |                        |                  |                       |
| MZT2B                                                                                                    | 2   | 130182262, 130190727         | DBP   | White    | TOPMed        | 1                      | 3                | $3.11 \times 10^{-5}$ |
|                                                                                                          |     |                              |       |          | UK Biobank    | 1                      | 5                | $3.10 \times 10^{-2}$ |
|                                                                                                          |     |                              |       |          | Meta-analysis |                        |                  | $1.43 \times 10^{-5}$ |
| DNAJB13                                                                                                  | 11  | 73950321, 73970287           | DBP   | Multi    | TOPMed        | 16                     | 451              | $2.91 \times 10^{-5}$ |
|                                                                                                          |     |                              |       |          | UK Biobank    | 8                      | 1,033            | $2.58 \times 10^{-2}$ |
|                                                                                                          |     |                              |       |          | Meta-analysis |                        |                  | $1.13 \times 10^{-5}$ |
| <i>Gene-based analysis (Enhancer, promoter, and exonic variants with predicted functional relevance)</i> |     |                              |       |          |               |                        |                  |                       |
| DNAJB13                                                                                                  | 11  | 73950321, 73970287           | DBP   | Multi    | TOPMed        | 30                     | 874              | $7.14 \times 10^{-5}$ |
|                                                                                                          |     |                              |       |          | UK Biobank    | 15                     | 1,474            | $6.01 \times 10^{-2}$ |
|                                                                                                          |     |                              |       |          | Meta-analysis |                        |                  | $5.29 \times 10^{-5}$ |
| NDRGB                                                                                                    | 14  | 21016763, 21070872           | DBP   | White    | TOPMed        | 64                     | 1,007            | $6.08 \times 10^{-5}$ |
|                                                                                                          |     |                              |       |          | UK Biobank    | 34                     | 3,909            | $1.07 \times 10^{-2}$ |
|                                                                                                          |     |                              |       |          | Meta-analysis |                        |                  | $9.95 \times 10^{-6}$ |
| TPPP2                                                                                                    | 14  | 21024262, 21036352           | DBP   | White    | TOPMed        | 36                     | 649              | $5.87 \times 10^{-5}$ |
|                                                                                                          |     |                              |       |          | UK Biobank    | 26                     | 3,237            | $1.69 \times 10^{-2}$ |
|                                                                                                          |     |                              |       |          | Meta-analysis |                        |                  | $1.47 \times 10^{-5}$ |

Chr, chromosome; DBP, diastolic blood pressure; TOPMed, Trans-omics for Precision Medicine program.

**Table S22.** Suggestive signals from meta-analyses of rare variants identified by leave-one-out analyses ( $P < 1 \times 10^{-4}$ ).

| Chr        | Position (GRCh38) | rsID                        | Associated Trait | Ancestry | Gene                                                  | Classification(s) | Alleles (Ref/Alt) | Sample        | AAC | Beta*  | SE   | P-value  |
|------------|-------------------|-----------------------------|------------------|----------|-------------------------------------------------------|-------------------|-------------------|---------------|-----|--------|------|----------|
| Novel Loci |                   |                             |                  |          |                                                       |                   |                   |               |     |        |      |          |
| 1          | 54810596          | rs377560726 <sup>†,‡</sup>  | DBP              | African  | <i>LEXM</i> <sup>§</sup>                              | Intronic          | C/G               | TOPMed        | 81  | -6.16  | 1.33 | 3.83E-06 |
|            |                   |                             |                  |          |                                                       |                   |                   | MVP           | 60  | -1.97  | 1.31 | 1.32E-01 |
|            |                   |                             |                  |          |                                                       |                   |                   | REGARDS       | 64  | -2.21  | 1.57 | 0.16     |
|            |                   |                             |                  |          |                                                       |                   |                   | Meta-analysis |     | -3.56  | 0.80 | 9.59E-06 |
| 2          | 211725173         | rs148992844 <sup>‡</sup>    | HTN              | Multi    | <i>ERBB4</i> <sup>§</sup>                             | Missense          | T/G               | TOPMed        | 39  | -1.69  | 0.37 | 5.39E-06 |
|            |                   |                             |                  |          |                                                       |                   |                   | MVP           | 17  | -0.62  | 0.46 | 0.17     |
|            |                   |                             |                  |          |                                                       |                   |                   | REGARDS       | 22  | -0.38  | 0.49 | 0.44     |
|            |                   |                             |                  |          |                                                       |                   |                   | Meta-analysis |     | -1.04  | 0.25 | 2.91E-05 |
| 2          | 211725173         | rs148992844 <sup>‡,  </sup> | HTN              | African  | <i>ERBB4</i> <sup>§</sup>                             | Missense          | T/G               | TOPMed        | 35  | -1.84  | 0.40 | 4.08E-06 |
|            |                   |                             |                  |          |                                                       |                   |                   | MVP           | 17  | -0.62  | 0.46 | 0.17     |
|            |                   |                             |                  |          |                                                       |                   |                   | REGARDS       | 22  | -0.38  | 0.49 | 0.44     |
|            |                   |                             |                  |          |                                                       |                   |                   | Meta-analysis |     | -1.06  | 0.26 | 3.55E-05 |
| 10         | 85490510          | rs191823543 <sup>‡</sup>    | DBP              | White    | <i>LINC01520</i> <sup>§</sup>                         | Intronic          | T/C               | TOPMed        | 6   | -13.89 | 4.47 | 1.88E-03 |
|            |                   |                             |                  |          |                                                       |                   |                   | UKBB          | 11  | -13.78 | 5.62 | 1.43E-02 |
|            |                   |                             |                  |          |                                                       |                   |                   | Meta-analysis |     | -13.85 | 3.50 | 7.57E-05 |
| 19         | 12969623          | rs140618957 <sup>  </sup>   | DBP              | White    | <i>DAND5</i> <sup>§</sup> , <i>PRRG2</i> <sup>#</sup> | hcLOF; 5'UTR      | GGACA/G           | TOPMed        | 9   | -11.68 | 3.60 | 1.18E-03 |
|            |                   |                             |                  |          |                                                       |                   |                   | UKBB          | 45  | -9.01  | 4.01 | 2.47E-02 |
|            |                   |                             |                  |          |                                                       |                   |                   | Meta-analysis |     | -10.49 | 2.68 | 9.06E-05 |

Novel Variants at Previously Reported Loci

|    |          |                          |     |       |                                  |            |     |               |    |        |      |          |
|----|----------|--------------------------|-----|-------|----------------------------------|------------|-----|---------------|----|--------|------|----------|
| 11 | 31969443 | rs886110723 <sup>‡</sup> | SBP | White | <i>LOC100506675</i> <sup>§</sup> | Intergenic | T/C | TOPMed        | 48 | -11.90 | 2.77 | 1.70E-05 |
|    |          |                          |     |       |                                  |            |     | UKBB          | 10 | -14.67 | 7.02 | 3.66E-02 |
|    |          |                          |     |       |                                  |            |     | Meta-analysis |    | -12.28 | 2.57 | 1.86E-06 |

AAF, alternative allele frequency, corresponding to the specified ancestry group in TOPMed; Alt, alternative; Chr, chromosome; DBP, diastolic blood pressure (BP); hcLOF, high-confidence loss-of-function variant; HTN, hypertension; MVP, Million Veteran Program; Ref, reference; REGARDS, Reasons for Geographic and Racial Differences in Stroke; SBP, systolic BP; TOPMed, Trans-Omics for Precision Medicine; UKBB, UK Biobank.

\*Beta corresponds to the effect size in mmHg and natural logarithm of the odds ratio per coded allele for the continuous and discrete blood pressure phenotypes, respectively. <sup>†</sup>Derived from gene-based analyses of regulatory and exonic variants with predicted functional relevance. <sup>‡</sup>Derived from sliding window analyses. <sup>§</sup>Gene (if genic) or nearest gene (if intergenic).

<sup>||</sup>Derived from gene-based analyses of loss-of-function, missense, or protein altering variants. <sup>¶</sup>Derived from gene-based analyses of high-confidence loss-of-function variants. <sup>#</sup>Identified in eQTL analyses.

**Table S23.** Results of conditional analyses at previously reported loci harboring potentially novel variants.

| Chr                                                            | Pos (B38) | rsID         | Associated Trait | Ancestry | Alleles (Ref/Alt) | AAF    | Discovery stage analysis |      |                 | Conditional analysis* |      |          |
|----------------------------------------------------------------|-----------|--------------|------------------|----------|-------------------|--------|--------------------------|------|-----------------|-----------------------|------|----------|
|                                                                |           |              |                  |          |                   |        | Beta                     | SE   | P               | Beta                  | SE   | P        |
| Newly identified rare variants from previously reported loci   |           |              |                  |          |                   |        |                          |      |                 |                       |      |          |
| 1                                                              | 36845873  | rs966779519  | HTN              | Multi    | T/C               | 0.0003 | -2.48                    | 0.49 | 4.66E-07        | -2.48                 | 0.49 | 4.67E-07 |
| 1                                                              | 112064726 | rs550856031  | SBP              | Multi    | G/C               | 0.0003 | -20.48                   | 3.94 | 2.00E-07        | -20.45                | 3.94 | 2.05E-07 |
| 1                                                              | 150513095 | rs12031974   | SBP              | Multi    | T/C               | 0.999  | 12.46                    | 2.37 | 1.44E-07        | 12.47                 | 2.37 | 1.41E-07 |
| 1                                                              | 150513095 | rs12031974   | SBP              | African  | T/C               | 0.997  | 12.59                    | 2.39 | 1.39E-07        | 12.63                 | 2.39 | 1.28E-07 |
| 7                                                              | 73727423  | rs530529907  | DBP              | Multi    | C/A               | 0.0005 | -8.76                    | 1.73 | 4.04E-07        | -9.33                 | 2.92 | 1.42E-03 |
| 11                                                             | 30758017  | rs759526273  | SBP              | Multi    | G/A               | 0.0005 | -12.80                   | 2.56 | 5.95E-07        | -12.91                | 2.57 | 4.89E-07 |
| 11                                                             | 30758017  | rs759526273† | SBP              | European | G/A               | 0.001  | -13.33                   | 2.60 | 2.80E-07        | -13.62                | 2.60 | 1.64E-07 |
| 11                                                             | 31969443  | rs886110723† | SBP              | European | T/C               | 0.0008 | -11.90                   | 2.77 | 1.70E-05        | -12.06                | 2.77 | 1.33E-05 |
| 16                                                             | 59640176  | rs999280636  | HTN              | Multi    | G/A               | 0.0001 | -4.06                    | 0.71 | <b>1.02E-08</b> | -19.83                | 5.43 | 2.60E-04 |
| Newly identified common variants from previously reported loci |           |              |                  |          |                   |        |                          |      |                 |                       |      |          |
| 19                                                             | 7325055   | rs36136513   | DBP              | Multi    | A/G               | 0.45   | -0.36                    | 0.07 | 4.18E-07        | -0.37                 | 0.07 | 2.64E-07 |

AAF, alternative allele frequency; Alt, alternative allele; Chr, chromosome; DBP, diastolic blood pressure (BP); HTN, hypertension; MVP, Million Veteran Program; Multi, multi-ancestry; Pos, position; SBP, systolic BP.

\* Association of identified variant after conditioning on all previously reported variants in the 1 MB region simultaneously.

†rs759526273 and rs886110723 are in moderate LD, with both p-values attenuated when conditioning on the other (P=4.25E-03 and 0.83, respectively).



A.) Multi-ancestry sample (N=51,456)

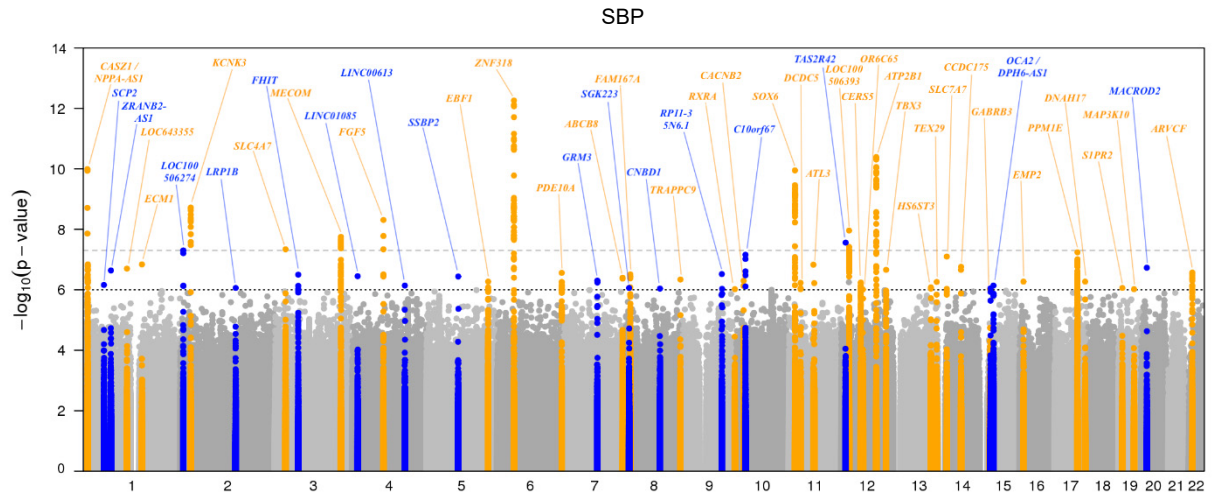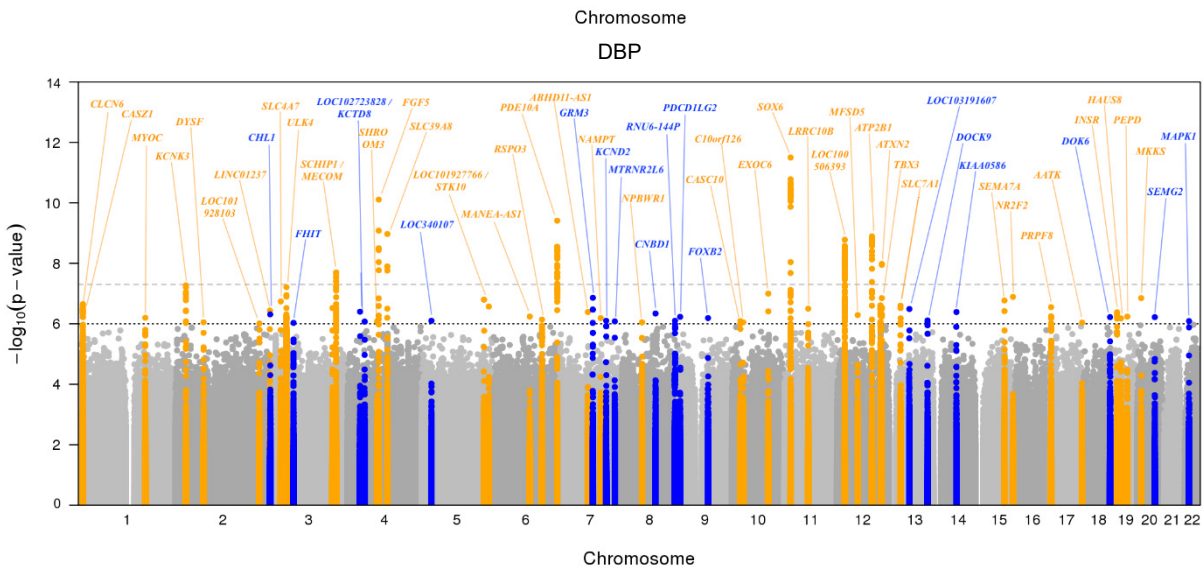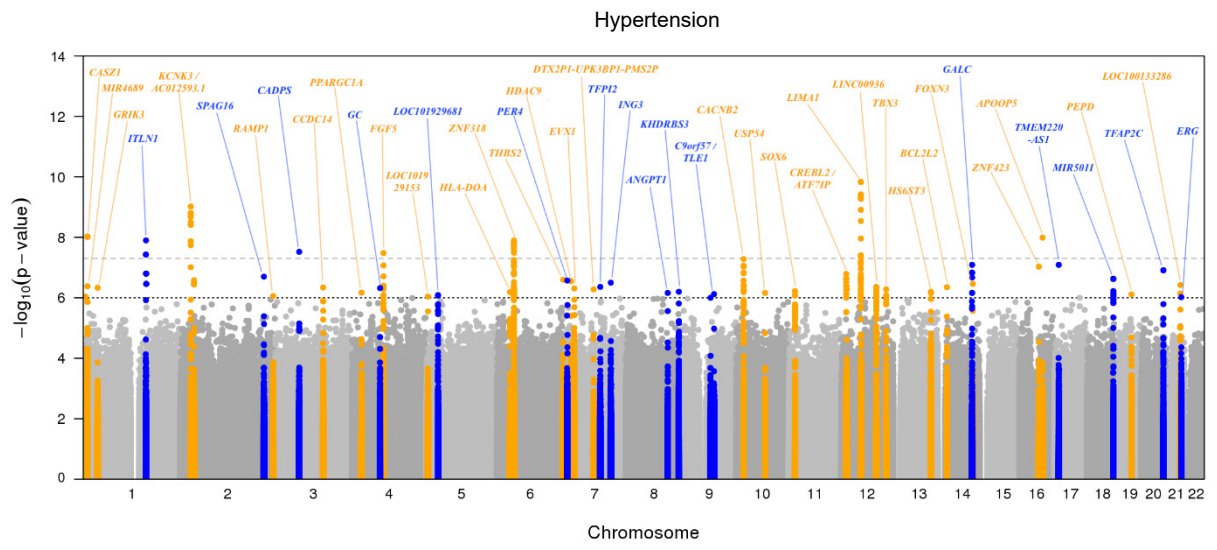

B.) African ancestry sample (N=13,836)

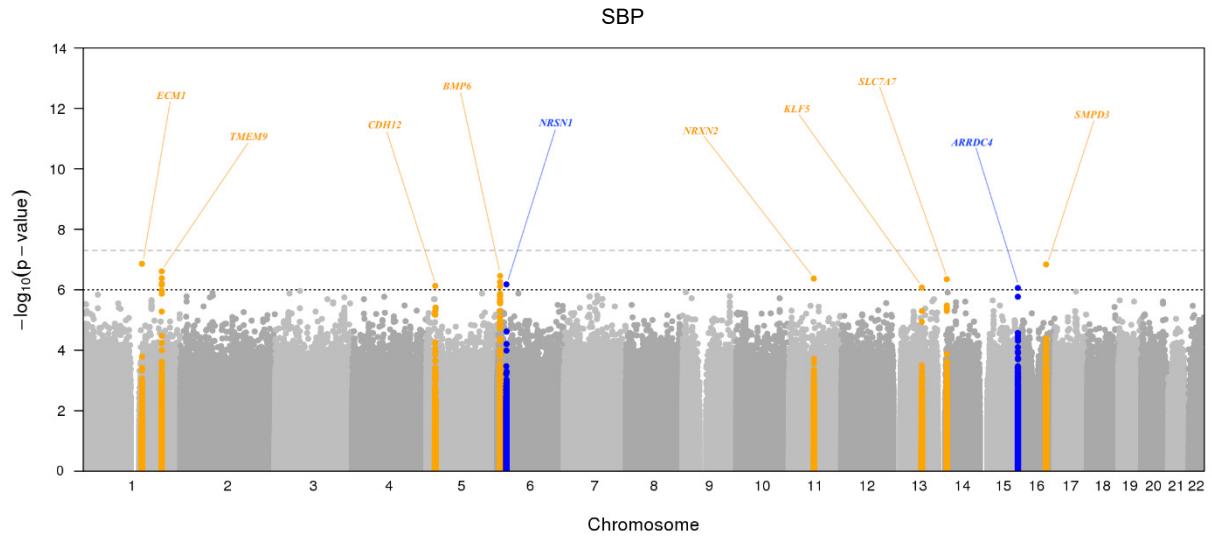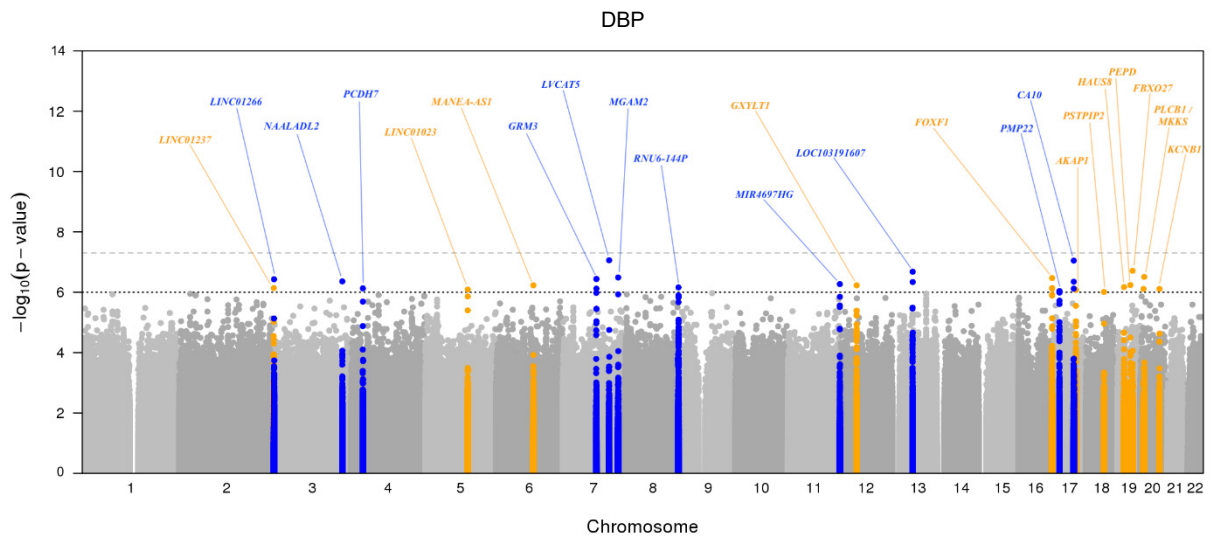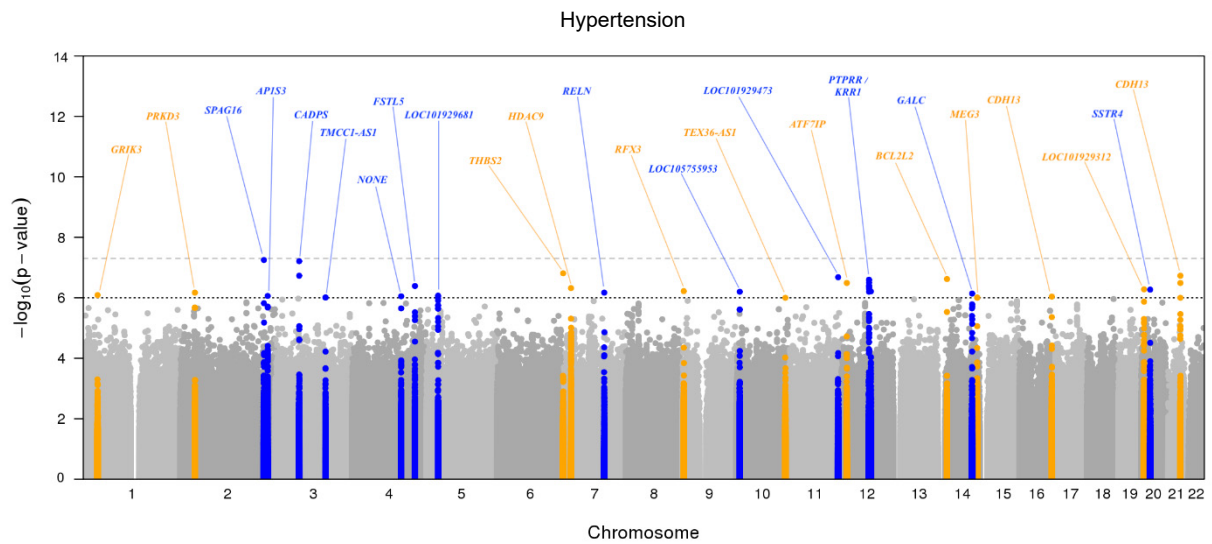

C.) Asian ancestry sample (N=3,796)

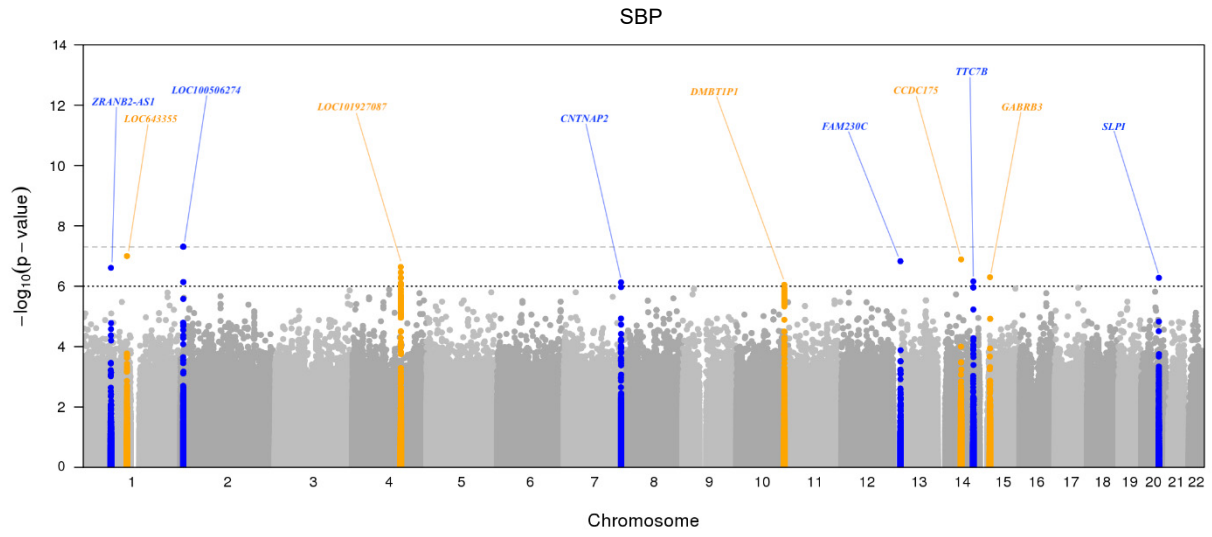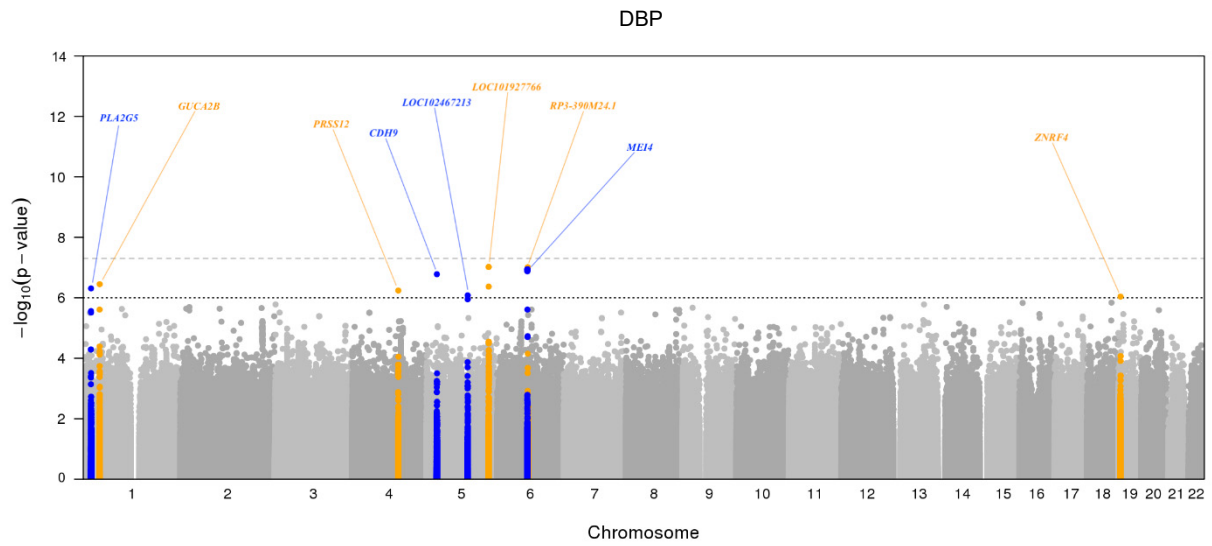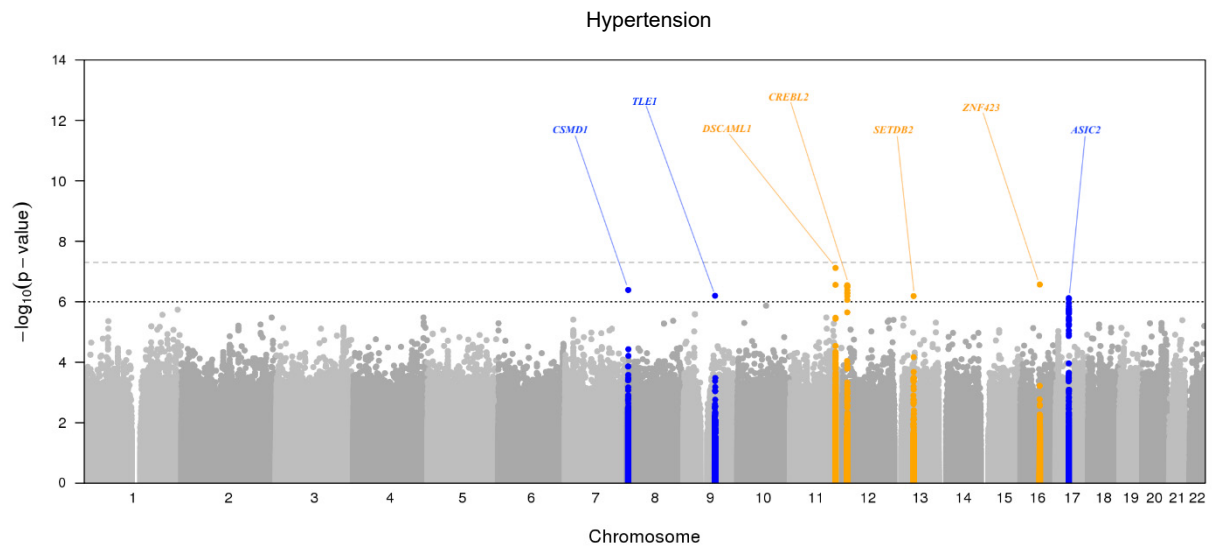

D.) European ancestry sample (N=28,390)

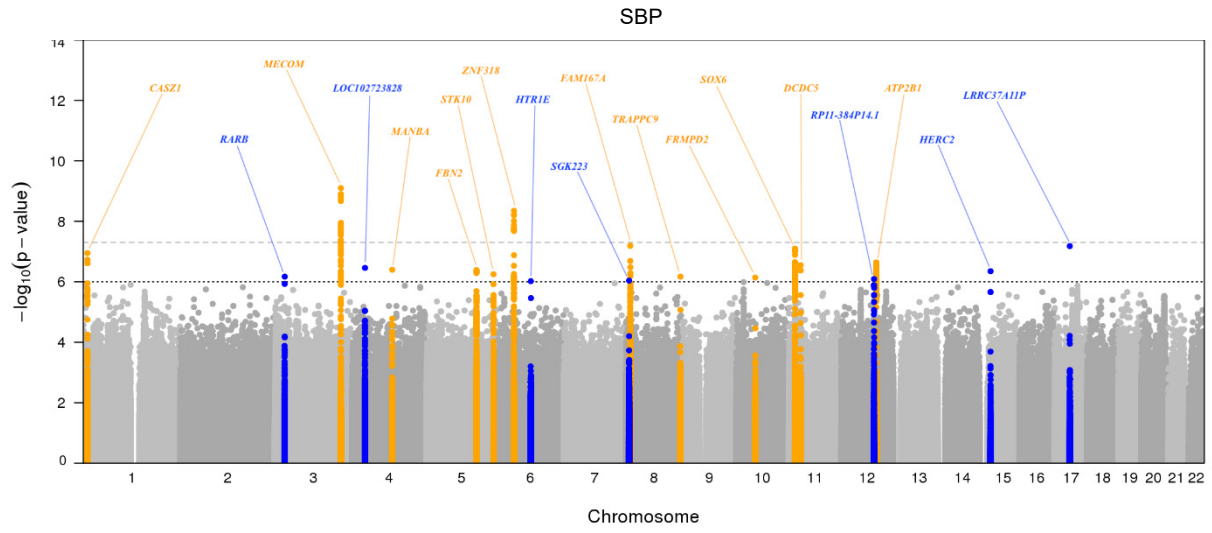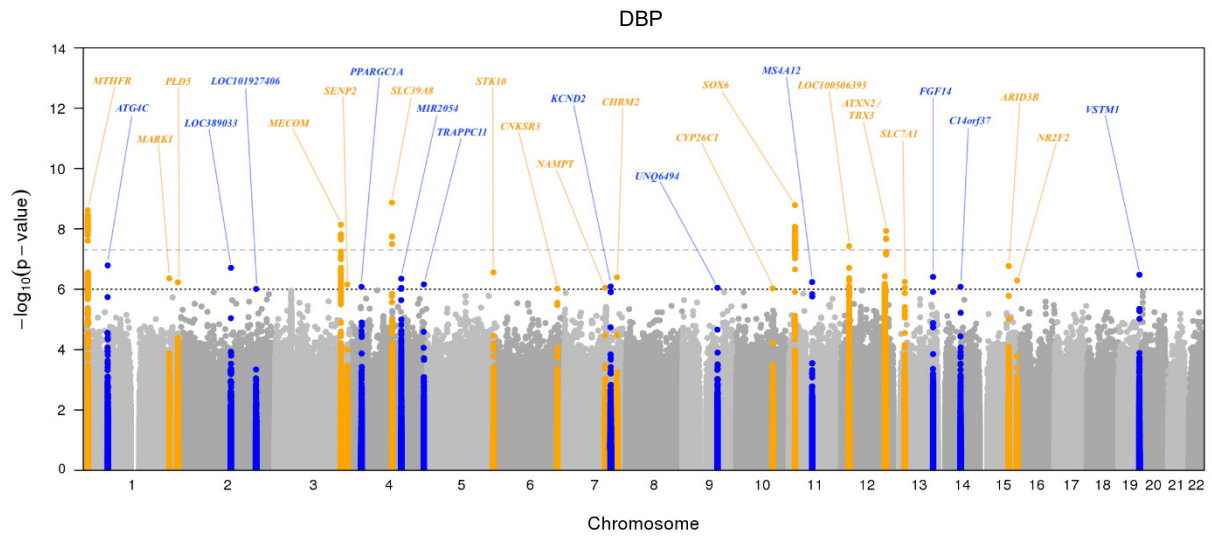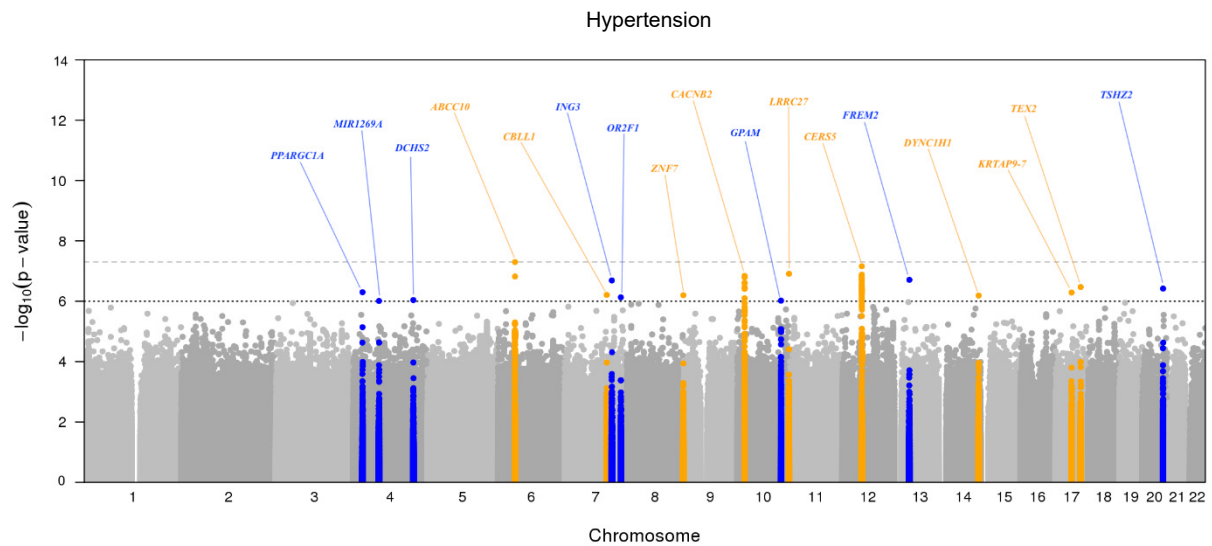

E.) Hispanic ancestry sample (N=4,173)

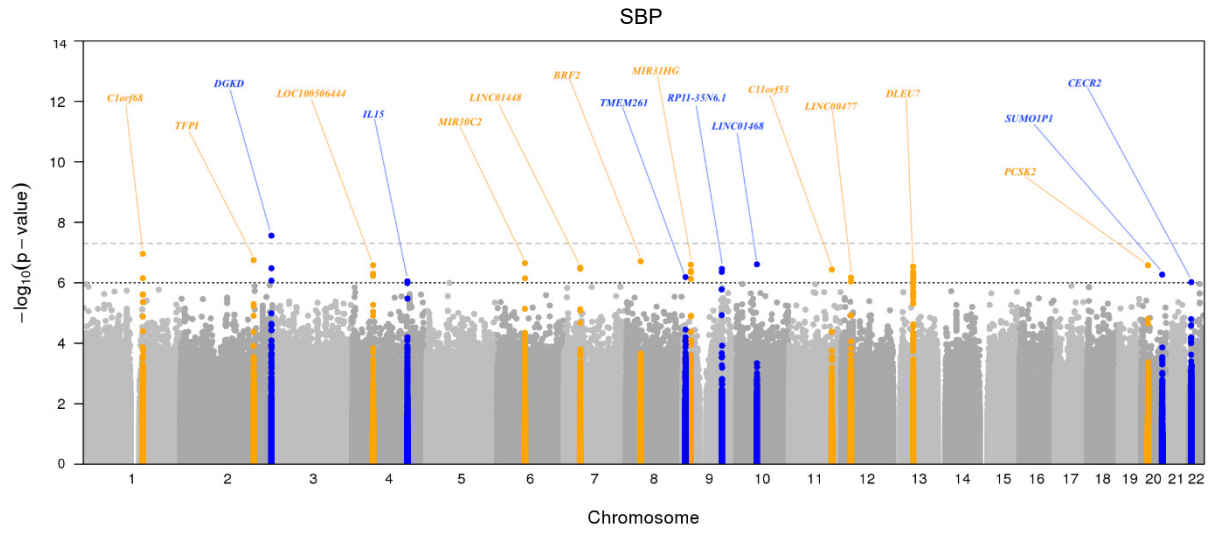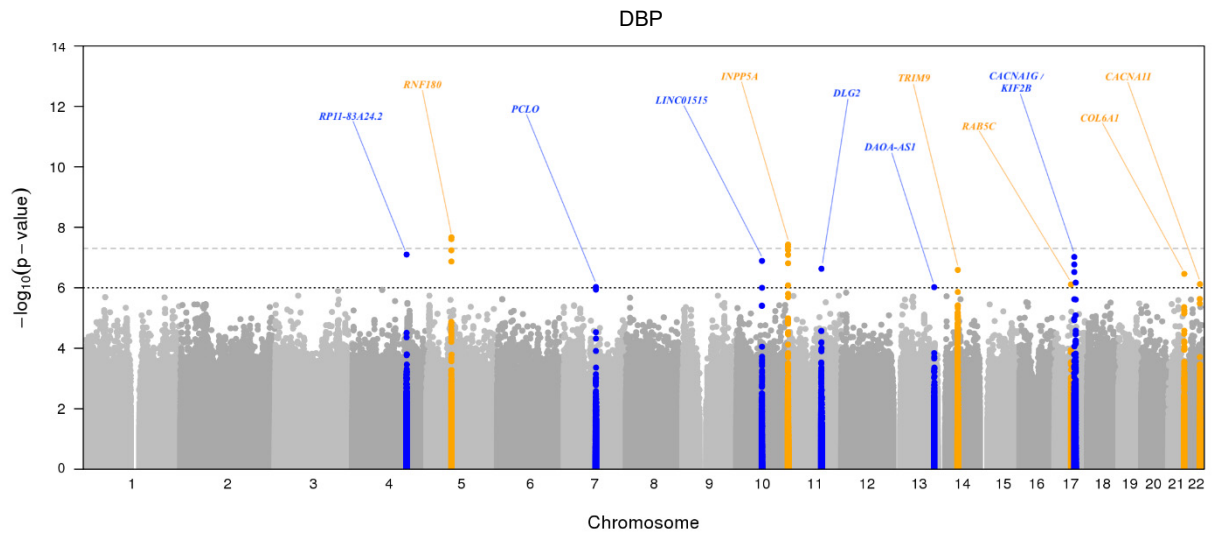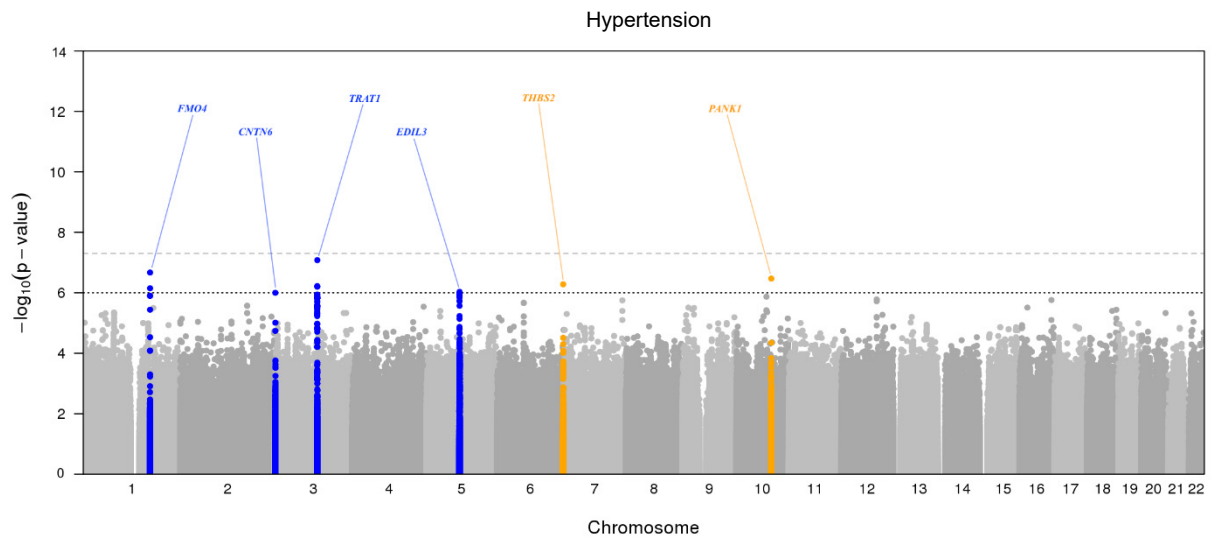

F.) Samoan ancestry sample (N=1,261)

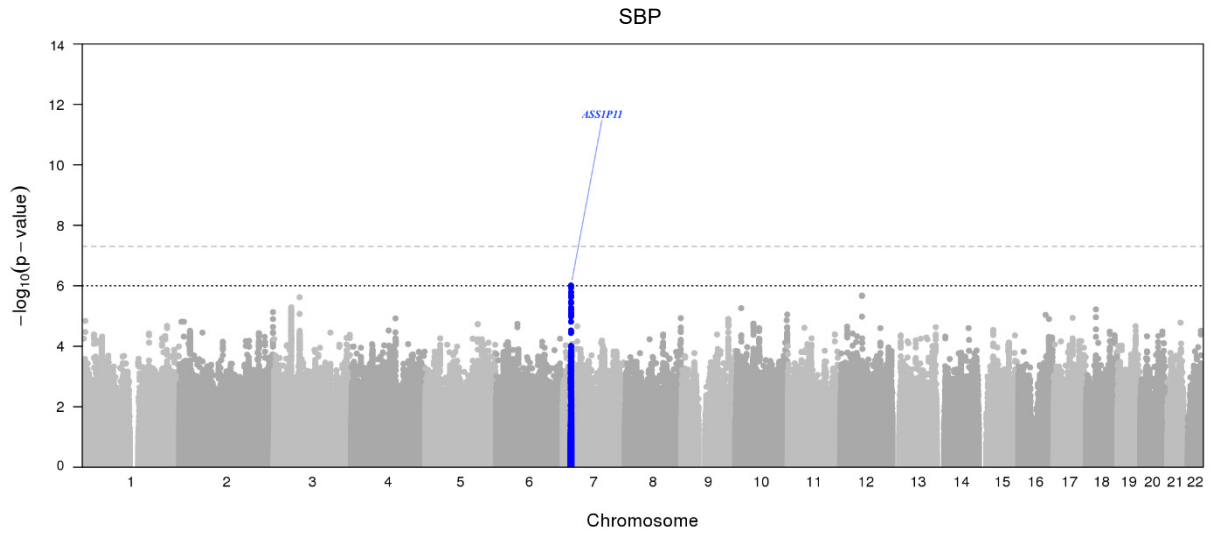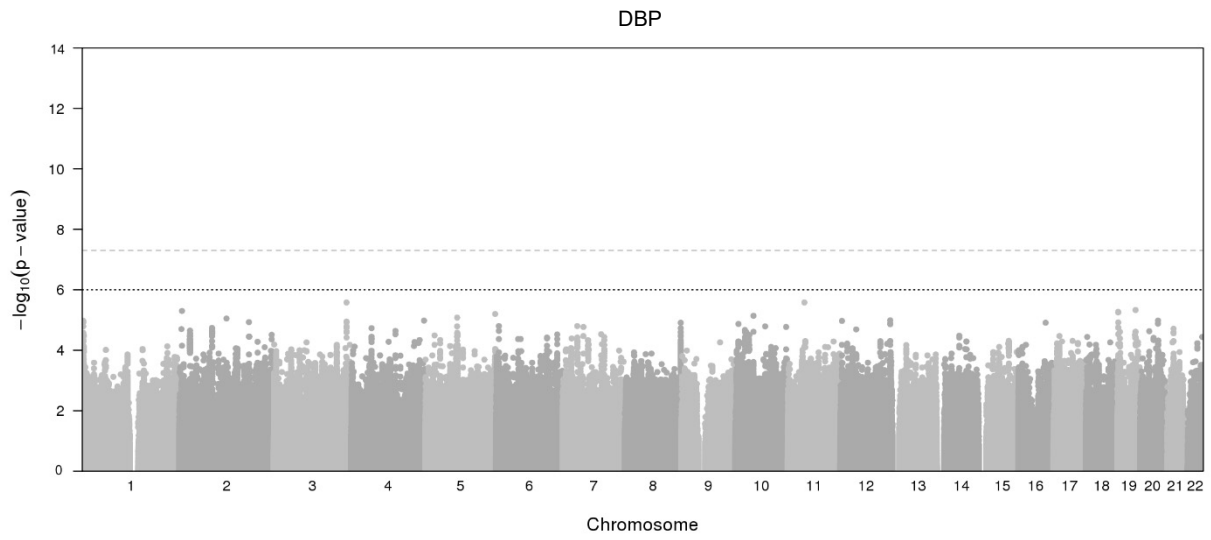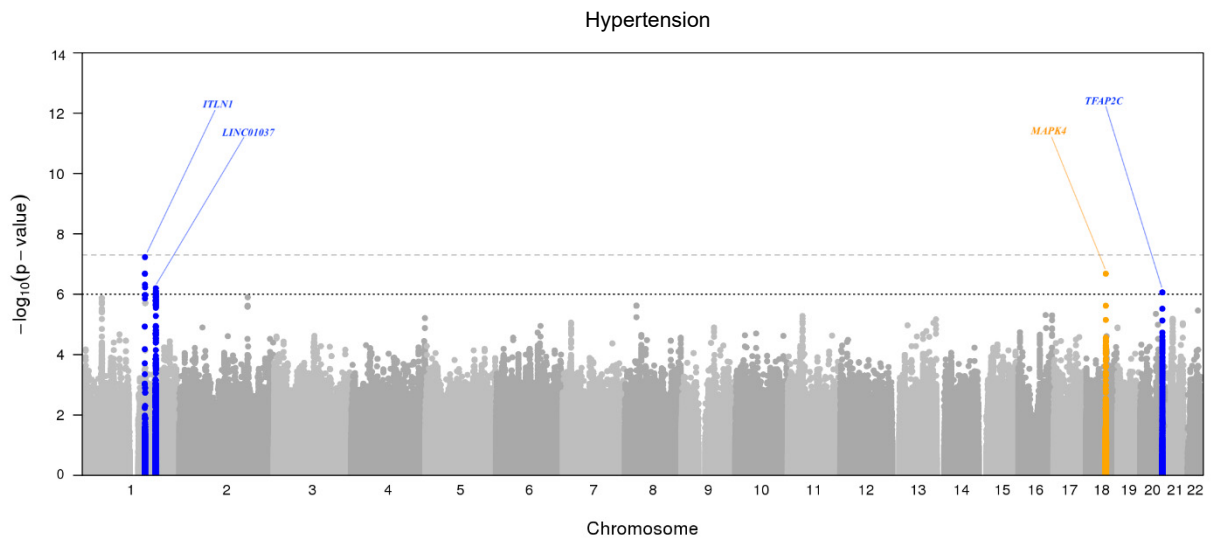

**Figure S1. Manhattan plots from discovery stage (TOPMed/CCDG) single variant analyses of systolic blood pressure, diastolic blood pressure, and hypertension.** Manhattan plots for SBP, DBP, and hypertension are displayed individually for the (A.) multi-ancestry, (B.) African ancestry, (C.) Asian ancestry, (D.) European ancestry, (E.) Hispanic ancestry, and (F.) Samoan ancestry samples. Novel loci are depicted in blue, and previously reported loci are depicted in yellow.

A.) Multi-ancestry sample (N=51,456)

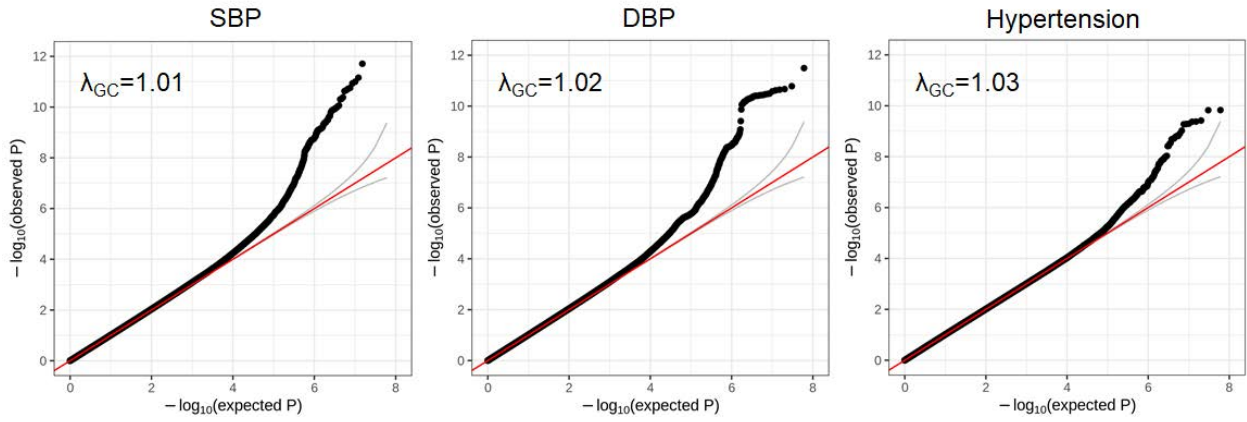

B.) African ancestry sample (N=13,836)

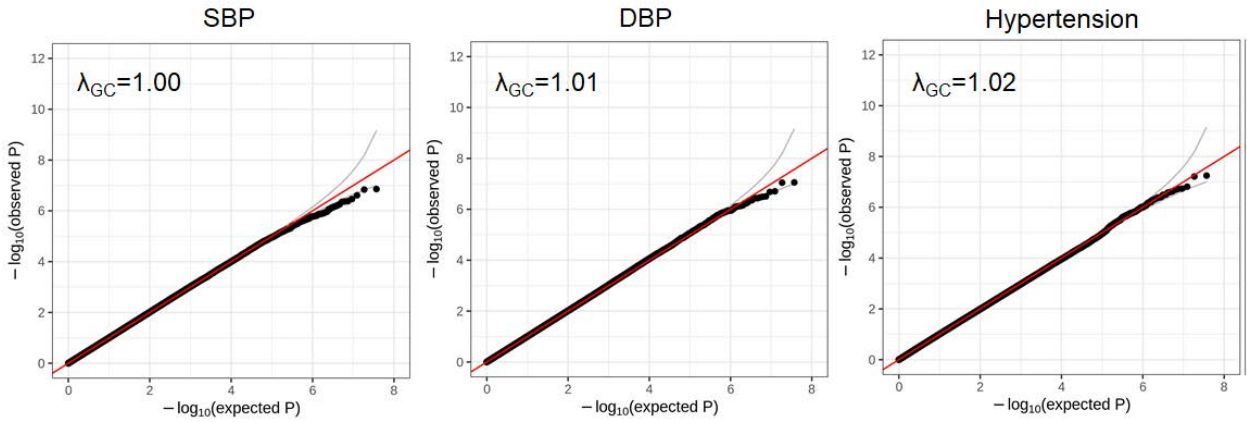

C.) Asian ancestry sample (N=3,796)

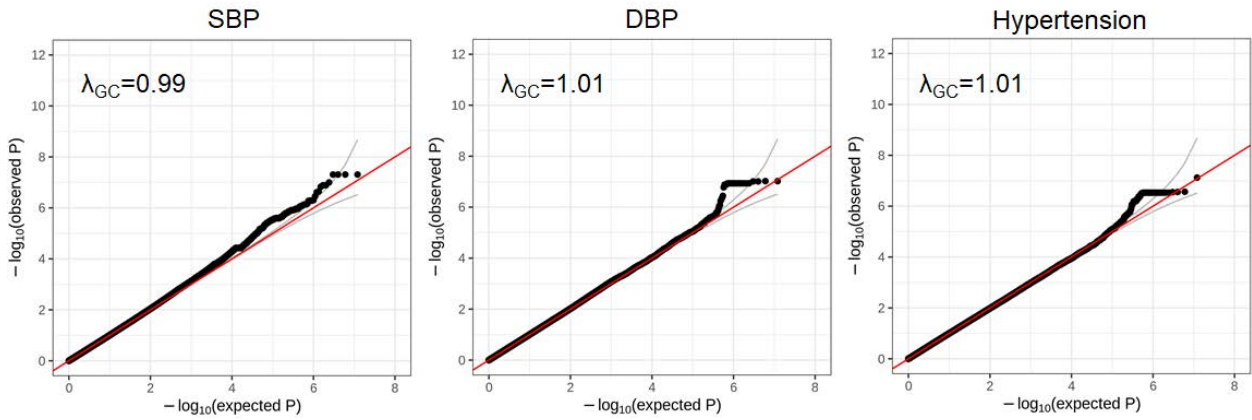



D.) European ancestry sample (N=28,390)

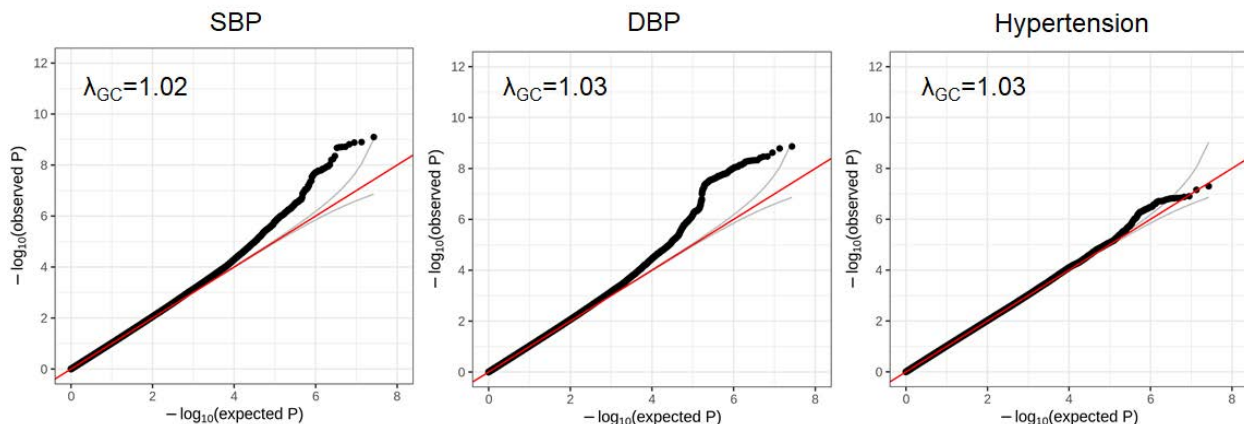

E.) Hispanic ancestry sample (N=4,173)

F.) Samoan ancestry sample (N=1,261)

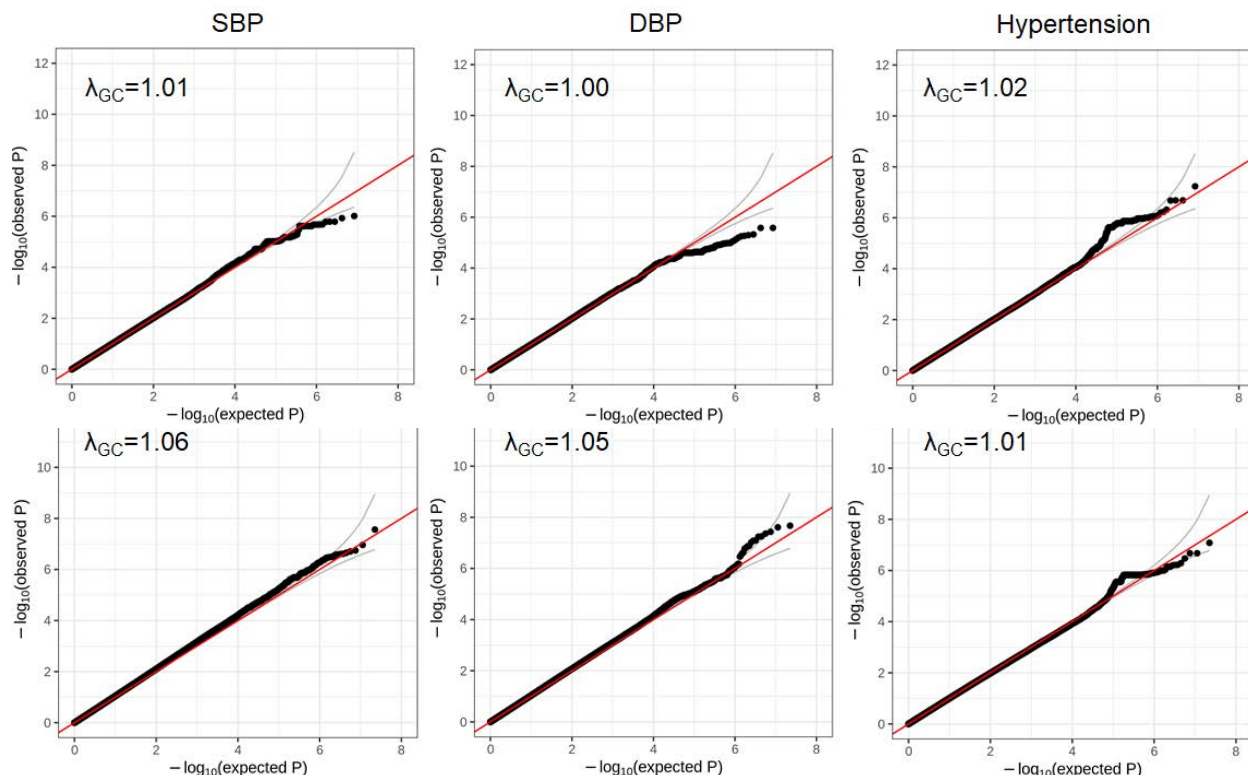

**Figure S2. Quantile-quantile (QQ) plots from discovery stage (TOPMed/CCDG) single variant analyses of systolic blood pressure, diastolic blood pressure, and hypertension.** QQ plots for SBP, DBP, and hypertension are displayed individually for the (A.) multi-ancestry, (B.) African ancestry, (C.) Asian ancestry, (D.) European ancestry, (E.) Hispanic ancestry, and (F.) Samoan ancestry samples.

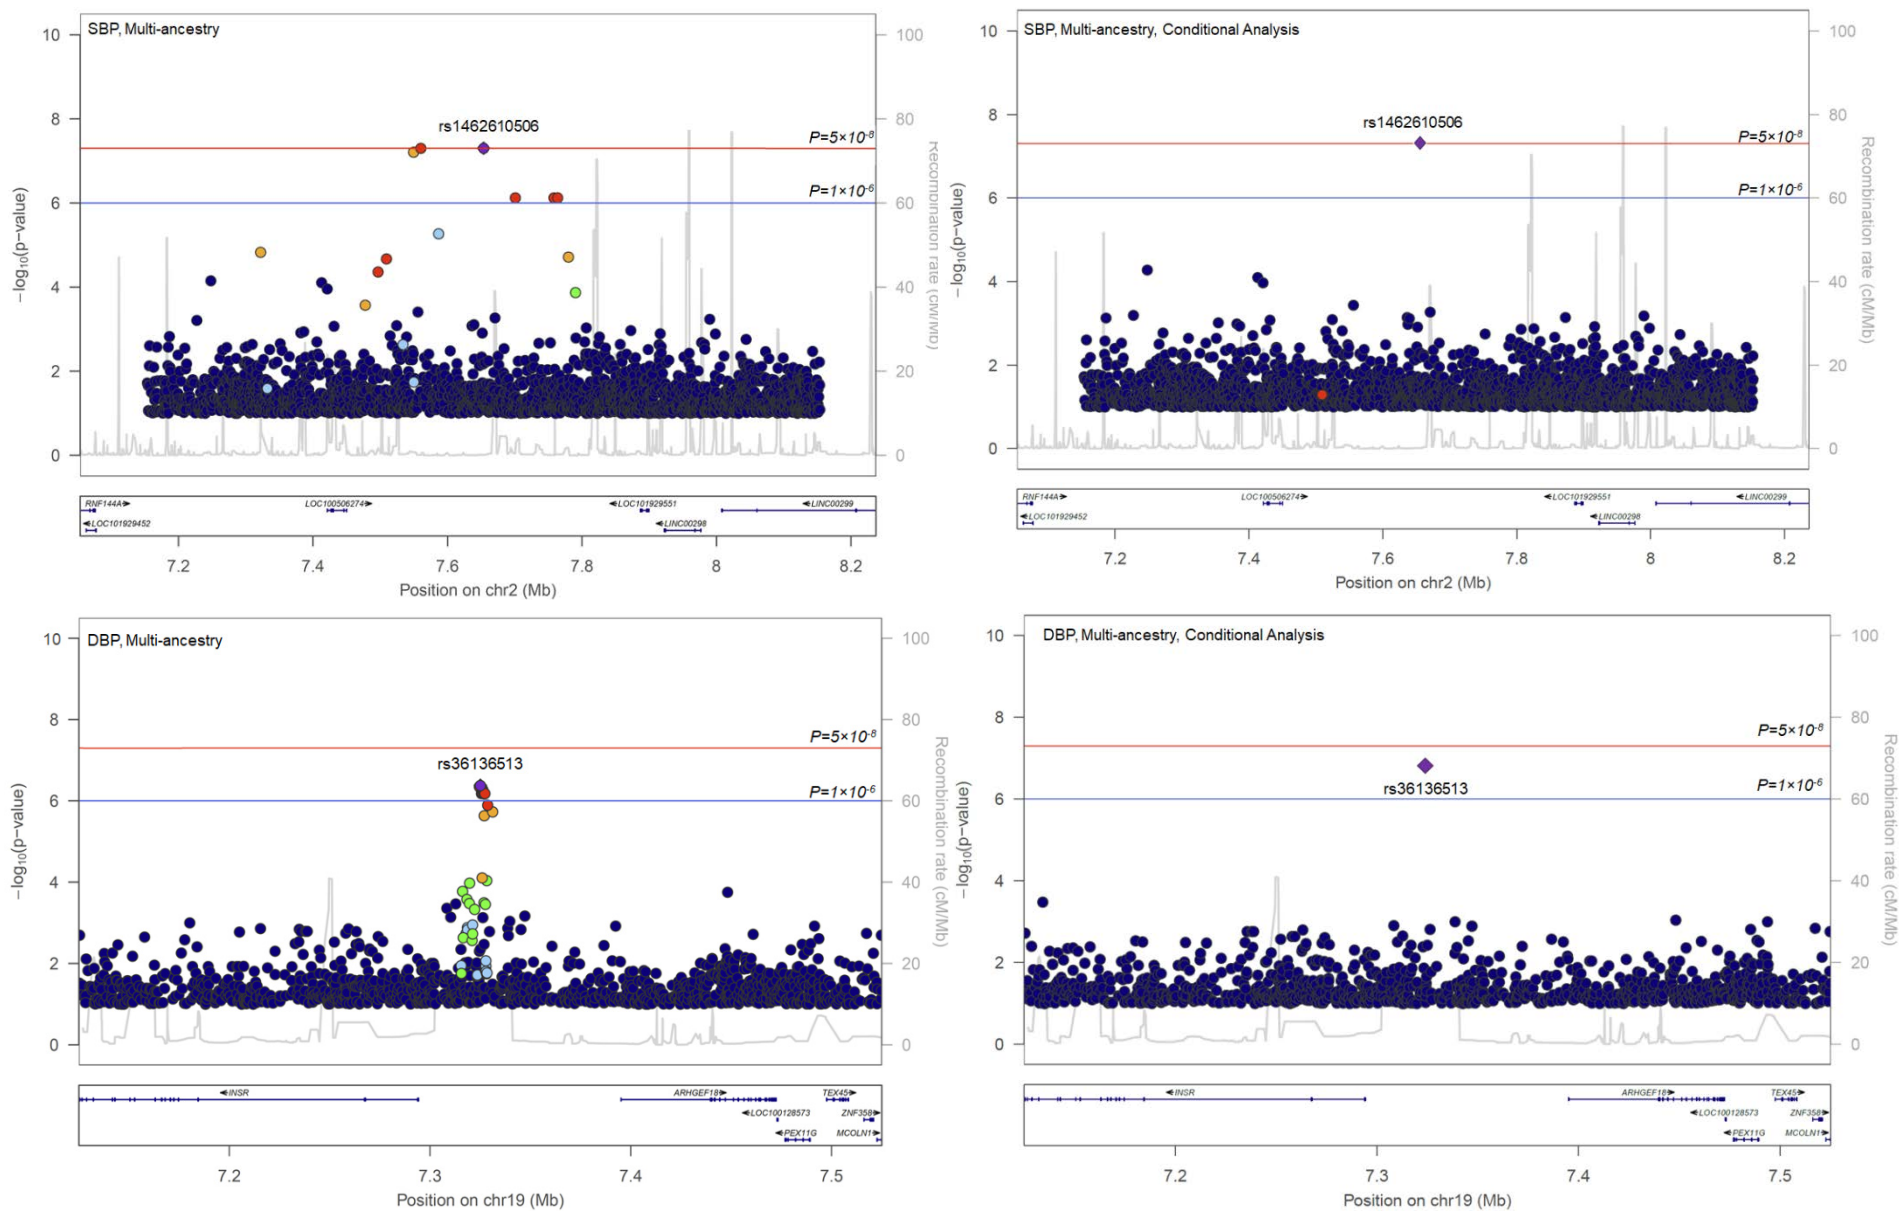

**Figure S3. Conditional analyses.** Results of the original analysis (left) and stepwise conditional analyses (right) for rs1462610506 (top) and rs36136513 (bottom).

## AUTHOR AFFILIATIONS

<sup>1</sup>Department of Epidemiology, Tulane University, New Orleans, LA 70112, USA. <sup>2</sup>Translational Sciences Institute, Tulane University, New Orleans, LA 70112, USA. <sup>3</sup>Department of Population and Quantitative Health Sciences, Case Western Reserve University, Cleveland, OH 44106, USA. <sup>4</sup>Human Genetics Center, Department of Epidemiology, Human Genetics, and Environmental Sciences, School of Public Health, The University of Texas Health Science Center at Houston, Houston, TX 77030, USA. <sup>5</sup>Department of Biostatistics, University of Michigan, Ann Arbor, MI 48109, USA. <sup>6</sup>Division of Genetic Medicine, Department of Medicine, Vanderbilt University Medical Center, Nashville, TN 37232, USA. <sup>7</sup>Biomedical Laboratory Research and Development, Tennessee Valley Healthcare System (626)/Vanderbilt University, Nashville, TN 37232, USA. <sup>8</sup>Department of Epidemiology, University of Alabama at Birmingham, Birmingham, AL 35294, USA. <sup>9</sup>Cardiovascular Health Research Unit, Department of Medicine, University of Washington, Seattle, WA 98101, USA. <sup>10</sup>Department of Epidemiology, University of North Carolina, Chapel Hill, NC 27514, USA. <sup>11</sup>The Institute for Translational Genomics and Population Sciences, Department of Pediatrics, The Lundquist Institute for Biomedical Innovation at Harbor-UCLA Medical Center, Torrance, CA 90502, USA. <sup>12</sup>National Heart, Lung and Blood Institute, Population Sciences Branch, National Institutes of Health, Framingham, MA 01702, USA. <sup>13</sup>Department of Physiology and Biophysics, University of Mississippi Medical Center, Jackson, MS 39216, USA. <sup>14</sup>The Charles Bronfman Institute for Personalized Medicine, The Icahn School of Medicine at Mount Sinai, New York, NY 10069, USA. <sup>15</sup>Department of Medicine, The Icahn School of Medicine at Mount Sinai, New York, NY 10069, USA. <sup>16</sup>Division of General Internal Medicine, Department of Medicine, Johns Hopkins University School of Medicine, Baltimore, MD 21287, USA. <sup>17</sup>Division of Epidemiology, Department of Public Health Sciences, University of Miami Miller School of Medicine, Miami, FL 33136, USA. <sup>18</sup>Department of Epidemiology, University of Michigan, Ann Arbor, MI 48109, USA. <sup>19</sup>Institute of Population Sciences, National Health Research Institutes, 350, Taiwan. <sup>20</sup>Division of Endocrinology, Diabetes, and Nutrition, Department of Medicine, University of Maryland School of Medicine, Baltimore, MD 21201, USA. <sup>21</sup>Department of Biostatistics, University of Alabama at Birmingham, Birmingham, AL 35294, USA. <sup>22</sup>Department of Human Genetics, University of Pittsburgh, Pittsburgh, PA 15261, USA. <sup>23</sup>Department of Human Genetics and South Texas Diabetes and Obesity Institute, University of Texas Rio Grande Valley, Brownsville, TX 78520, USA. <sup>24</sup>Division of Cardiovascular Medicine, Department of Medicine, Stanford University, CA 94305, USA. <sup>25</sup>Division of Cardiology Medicine, Palo Alto VA HealthCare System, Palo Alto, CA 94304, USA. <sup>26</sup>Division of General Medicine, Department of Medicine, Columbia University, New York, NY 10032, USA. <sup>27</sup>Department of Biostatistics, Boston University, Boston, MA 02118, USA. <sup>28</sup>Division of Health System Innovation and Research, Department of Population Health Sciences, University of Utah School of Medicine, Salt Lake City, UT 84103, USA. <sup>29</sup>Division of Cardiology, Department of Medicine, Johns Hopkins University School of Medicine, Baltimore 21287, MD, USA. <sup>30</sup>Taichung Veterans General Hospital, Taichung 407204, Taiwan. <sup>31</sup>Department of Biostatistics, Graduate School of Public Health, University of Pittsburgh, Pittsburgh, PA, USA 15261. <sup>32</sup>Department of Clinical Pharmacology, William Harvey Research Institute, Barts and The London School of Medicine and Dentistry, Queen Mary University of London, London EC1M 6BQ, UK. <sup>33</sup>National Institute for Health Research Barts Cardiovascular Biomedical Research Centre, Queen Mary University of London, London EC1M 6BQ, UK. <sup>34</sup>Division of Quantitative Sciences, Department of Obstetrics and Gynecology, Vanderbilt University, Nashville, TN 37203, USA. <sup>35</sup>Division of Cardiology, Department of Medicine, George Washington University, Washington, DC 20037, USA. <sup>36</sup>Department of Biostatistics, School of Public Health, University of Washington, Seattle, WA 98195, USA. <sup>37</sup>Division of Cardiology, Department of Medicine, University of Mississippi Medical Center, Jackson, MS 39216, USA. <sup>38</sup>Hasso Plattner Institute for Digital Health at Mount Sinai, The Icahn School of Medicine at Mount Sinai, New York, NY 10069, USA. <sup>39</sup>Department of Internal Medicine, National Taiwan University Hospital, Taipei 100, Taiwan.

<sup>40</sup>Ministry of Health, Government of Samoa, Apia, Samoa. <sup>41</sup>Division of Nephrology and Hypertension, Department of Medicine, Vanderbilt University Medical Center, Nashville, TN 37232, USA. <sup>42</sup>Division of Public Health Sciences, Department of Biostatistics and Data Science, Wake Forest School of Medicine, Winston-Salem, NC 27157, USA. <sup>43</sup>Department of Epidemiology and Key Laboratory of Cardiovascular Epidemiology, Fuwai Hospital, National Center for Cardiovascular Diseases, Chinese Academy of Medical Sciences and Peking Union Medical College, Beijing 100037, China. <sup>44</sup>Lutia i Puava ae Mapu i Fagalele, Apia 663030, Samoa. <sup>45</sup>Department of Internal Medicine: Cardiology, University of Michigan, Ann Arbor, MI 48109, USA. <sup>46</sup>Department of Epidemiology Research, Statens Serum Institut, Copenhagen 2300, Denmark. <sup>47</sup>Department of Computational Medicine and Bioinformatics, University of Michigan, Ann Arbor, MI 48109, USA. <sup>48</sup>Department of Chronic Disease Epidemiology, Yale University, New Haven, CT 06510, USA. <sup>49</sup>Department of Biostatistics, University of Pittsburgh, Pittsburgh, PA 15261, USA. <sup>50</sup>Department of Pathology & Laboratory Medicine, Larner College of Medicine, University of Vermont, Burlington 05405, VT. <sup>51</sup>Department of Genetics and Genomics, The Icahn School of Medicine at Mount Sinai, New York, NY 10069, USA. <sup>52</sup>Division of Cardiology, Department of Medicine, Columbia University Medical Center, New York, NY 10032, USA. <sup>53</sup>Center for Human Genetics and Genomics, New York University Grossman School of Medicine, New York, NY 10016, USA. <sup>54</sup>Center for Public Health, University of Virginia, Charlottesville, VA 22908, USA. <sup>55</sup>Division of Public Health Sciences, Fred Hutchinson Cancer Research Center, Seattle, WA 98109, USA. <sup>56</sup>OLaGa banner group members are included in the study specific acknowledgements section of the supplemental data. <sup>57</sup>Division of Sleep and Circadian Disorders, Department of Medicine, Brigham and Women's Hospital, Boston, MA 02115, USA. <sup>58</sup>Geriatrics Research and Education Clinical Center, Baltimore Veterans Administration Medical Center, Baltimore, MD 21201, USA. <sup>59</sup>Division of Biostatistics, Washington University School of Medicine, St. Louis, MO 63110, USA. <sup>60</sup>Division of Social Medicine, Albert Einstein College of Medicine, Bronx, NY 10461, USA. <sup>61</sup>Division of Allergy & Clinical Immunology, Department of Medicine, Johns Hopkins University School of Medicine, Baltimore, MD 21224, USA. <sup>62</sup>Cardiovascular Health Research Unit, Departments of Medicine, Epidemiology, and Health Services, University of Washington, Seattle, WA 98101, USA. <sup>63</sup>Kaiser Permanente Washington Health Research Institute, Seattle, WA, 98101, USA. <sup>64</sup>Brown Foundation Institute of Molecular Medicine, University of Texas Health Science Center at Houston, Houston, TX 77030, USA. <sup>65</sup>Human Genetics Center, University of Texas Health Science Center at Houston, Houston, TX 77030, USA. <sup>66</sup>The Mindich Child Health and Development Institute, The Icahn School of Medicine at Mount Sinai, New York, NY 10069, USA. <sup>67</sup>Department of Medicine, University of Mississippi Medical Center, Jackson, MS 39216, USA. <sup>68</sup>Human Genome Sequencing Center, Baylor College of Medicine, Houston, TX 77030, USA. <sup>69</sup>Division of Epidemiology, Department of Medicine, Vanderbilt University Medical Center, Nashville, TN 37203, USA. <sup>70</sup>College of Public Health, University of Kentucky, Lexington, KY 40536, USA. <sup>71</sup>These authors contributed equally to this work.

## TRANS-OMICS FOR PRECISION MEDICINE (TOPMED) ACKNOWLEDGEMENTS

Molecular data for the Trans-Omics in Precision Medicine (TOPMed) program was supported by the National Heart, Lung and Blood Institute (NHLBI). WGS for NHLBI TOPMed: WGS and Related Phenotypes in the Amish Complex Disease Research Program (phs000956) was performed at the Broad Institute of MIT and Harvard (3R01HL121007-01S1). WGS for NHLBI TOPMed: WGS and Related Phenotypes in the Atherosclerosis Risk in Communities study (phs001211) was performed at the Baylor Human Genome Sequencing Center (3U54HG003273-12S2 and HHSN268201500015C) and the Broad Institute for MIT and Harvard (3R01HL092577-06S1). WGS for NHLBI TOPMed: WGS and Related Phenotypes in the IPM BioMe Biobank (phs001644) was performed at the Baylor Human Genome Sequencing Center (HHSN268201600033I) and the McDonnell Genome Institute at Washington University (HHSN268201600037I). WGS for NHLBI TOPMed: WGS and Related Phenotypes in the Coronary Artery Risk Development in Young Adults (phs001612) was performed at the Baylor Human Genome Sequencing Center (HHSN268201600033I). WGS for NHLBI TOPMed: WGS and Related Phenotypes in the Cleveland Family Study (phs000954) was performed at the University of Washington Northwest Genomics Center (3R01HL098433-05S1 and HHSN268201600032I). WGS for NHLBI TOPMed: WGS and Related Phenotypes in the Cardiovascular Health Study (phs001368) was performed at the Baylor Human Genome Sequencing Center (HHSN268201600033I). WGS for NHLBI TOPMed: WGS and Related Phenotypes in the Framingham Heart Study (phs000974) was performed at the Broad Institute of MIT and Harvard (3U54HG003067-12S2). WGS for NHLBI TOPMed: WGS and Related Phenotypes in the Genetic Studies of Atherosclerosis Risk (phs001218) was performed by the Broad Institute of MIT and Harvard (HHSN268201500014C), Psomagen, Inc. (3R01HL112064-04S1), and Illumina Genomic Services (R01HL112064). WGS for NHLBI TOPMed: WGS and Related Phenotypes in the Genetic Epidemiology Network of Arteriopathy (phs001345) was performed at the Mayo Clinic Genotyping Core, the DNA Sequencing and Gene Analysis Center at the University of Washington Northwest Genomics Center (3R01HL055673-18S1), and the Broad Institute (HHSN268201500014C). WGS for NHLBI TOPMed: WGS and Related Phenotypes in the Genetic Epidemiology Network of Salt-Sensitivity (phs001217) was performed at the Baylor Human Genome Sequencing Center (HHSN268201500015C). WGS for NHLBI TOPMed: WGS and Related Phenotypes in the Genetics of Lipid Lowering Drugs and Diet Network (phs001359) was performed at the University of Washington Northwest Genomics Center (3R01HL104135-04S1). WGS for NHLBI TOPMed: WGS and Related Phenotypes in the Hispanic Community Health Study – Study of Latinos (phs001395) was performed at the Baylor Human Genome Sequencing Center (HHSN268201600033I). WGS for NHLBI TOPMed: WGS and Related Phenotypes in the Hypertension Genetic Epidemiology Network (phs001293) was performed at the University of Washington Northwest Genomics Center (3R01HL055673-18S1). WGS for NHLBI TOPMed: WGS and Related Phenotypes in the Jackson Heart Study (phs000964) was performed at the University of Washington Northwest Genomics Center (HHSN268201100037C). WGS for NHLBI TOPMed: WGS and Related Phenotypes in the Multi-Ethnic Study of Atherosclerosis (phs001416) was performed at the Broad Institute of MIT and Harvard (3U54HG003067-13S1). WGS for NHLBI TOPMed: Genome-wide Association Study of Adiposity in Samoans (phs000972) was performed at the University of Washington Northwest Genomics Center (HHSN268201100037C) and the New York Genome Center (HHSN268201500016C). WGS for NHLBI TOPMed: WGS and Related Phenotypes in the Taiwan Study of Hypertension using Rare Variants (phs001387) was performed at the Baylor Human Genome Sequencing Center (3R01HL111249-04S1 and HHSN26820150015C). WGS for NHLBI TOPMed: WGS and Related Phenotypes in the Women’s Health Initiative (phs001237) was performed at the Broad Institute of MIT and Harvard (HHSN268201500014C). Core support including centralized genomic read mapping and genotype calling, along with variant quality metrics and filtering were provided by the TOPMed Informatics Research Center (3R01HL-117626-02S1; contract HHSN268201800002I). Core support

including phenotype harmonization, data management, sample-identity QC, and general program coordination were provided by the TOPMed Data Coordinating Center (R01HL-120393; U01HL-120393; contract HHSN268201800001I). We gratefully acknowledge the studies and participants who provided biological samples and data for TOPMed.

## STUDY SPECIFIC ACKNOWLEDGEMENTS AND FUNDING SOURCES

**Amish:** The Amish studies upon which these data are based were supported by NIH grants R01 AG18728, U01 HL072515, R01 HL088119, and R01 HL121007.

**Analysis Commons:** The Analysis Commons was funded by R01HL131136.

**ARIC:** The Atherosclerosis Risk in Communities study has been funded in whole or in part with Federal funds from the NHLBI, National Institutes of Health (NIH), Department of Health and Human Services (contract numbers HHSN268201700001I, HHSN268201700002I, HHSN268201700003I, HHSN268201700004I and HHSN268201700005I). The authors thank the staff and participants of the ARIC study for their important contributions.

WGS for the Genome Sequencing Program (GSP) was funded by the National Human Genome Research Institute (NHGRI), the NHLBI, and the National Eye Institute (NEI). The GSP Coordinating Center (U24 HG008956) contributed to cross-program scientific initiatives and provided logistical and general study coordination. The Centers for Common Disease Genomics (CCDG) program was supported by NHGRI and NHLBI, and WGS was performed at the Baylor College of Medicine Human Genome Sequencing Center (UM1 HG008898 and R01HL059367).

Paul S. de Vries was supported by American Heart Association grant number 18CDA34110116.

**BioMe:** The Mount Sinai BioMe Biobank has been supported by The Andrea and Charles Bronfman Philanthropies and in part by Federal funds from the NHLBI and NHGRI (U01HG00638001; U01HG007417; R56HG010297; R01DK110113; R01DK107786; X01HL134588). We thank all participants in the Mount Sinai Biobank. We also thank all our recruiters who have assisted and continue to assist in data collection and management and are grateful for the computational resources and staff expertise provided by Scientific Computing at the Icahn School of Medicine at Mount Sinai.

**CHS:** This research was supported by contracts HHSN268201200036C, HHSN268200800007C, HHSN268201800001C, N01HC55222, N01HC85079, N01HC85080, N01HC85081, N01HC85082, N01HC85083, N01HC85086, and grants R01HL120393, R01HL105756, U01HL080295 and U01HL130114 from the NHLBI, with additional contribution from the National Institute of Neurological Disorders and Stroke (NINDS). Additional support was provided by R01AG023629 from the National Institute on Aging (NIA). A full list of principal CHS investigators and institutions can be found at [CHS-NHLBI.org](http://CHS-NHLBI.org).

**CFS:** CFS was supported by the NHLBI (R35HL135818, R01HL113338, R01HL098433, and R01HL46380).

**CARDIA:** CARDIA is conducted and supported by the NHLBI in collaboration with the University of Alabama at Birmingham (HHSN268201800005I & HHSN268201800007I), Northwestern University (HHSN268201800003I), University of Minnesota (HHSN268201800006I), and Kaiser Foundation Research Institute (HHSN268201800004I).

WGS for the TOPMed program was supported by the NHLBI. WGS for the CARDIA study (phs001612) was performed at the Baylor College of Medicine Human Genome Sequencing Center (HHSN268201600033I). Centralized read mapping and genotype calling, along with variant quality metrics and filtering were provided by the TOPMed Informatics Research Center (3R01HL-117626-02S1; contract HHSN268201800002I). Phenotype harmonization, data management, sample-identity QC, and general study coordination were provided by the TOPMed Data Coordinating Center (3R01HL-120393-

02S1; contract HHSN268201800001I). We gratefully acknowledge the studies and participants who provided biological samples and data for TOPMed.

**FHS:** Support for the FHS was provided by the NIH contract N01-HC-25195 (Boston University). We would also like to thank the FHS participants and families who participate in FHS research. In addition, we acknowledge the contributions of the research scientists and staffs of the Division of Intramural Research, NHLBI, NIH and Boston University.

**GENOA:** Support for GENOA was provided by the NHBLI (HL054457, HL054464, HL054481, HL087660, HL119443) of the NIH. We would also like to thank the families that participated in the GENOA study.

**GenSalt:** GenSalt was supported by research grants (U01HL072507, R01HL087263, and R01HL090682) from the NHLBI and partially supported by the National Institute of General Medical Sciences of the NIH under Award Number P20GM109036 and the Collins C. Diboll Private Foundation, New Orleans, LA. Tanika N. Kelly received analysis support for this project from NHLBI grant 5U01HL120393.

**GOLDN:** We thank the GOLDN Study participants and investigators for their significant contributions. GOLDN biospecimens, baseline phenotype data, and intervention phenotype data were collected with funding from NHLBI grant U01 HL072524. Whole-genome sequencing in GOLDN was funded by NHLBI grant R01 HL104135-04S1.

**GeneSTAR:** GeneSTAR was supported by grants from the NIH/NHLBI (U01 HL72518, HL087698, HL49762, HL58625, HL071025, HL112064), the NIH/National Institute of Nursing Research (NR0224103), and by a grant from the NIH/National Center for Research Resources (M01-RR000052) to the Johns Hopkins General Clinical Research Center.

**HCHS-SOL:** The authors thank the staff and participants of HCHS/SOL for their important contributions. A complete list of HCHS/SOL staff and investigators can be found at <http://www.csc.unc.edu/hchs/>. The Hispanic Community Health Study/Study of Latinos is a collaborative study supported by contracts from the NHLBI to the University of North Carolina (HHSN268201300001I / N01-HC-65233), University of Miami (HHSN268201300004I / N01-HC-65234), Albert Einstein College of Medicine (HHSN268201300002I / N01-HC-65235), University of Illinois at Chicago – HHSN268201300003I / N01-HC-65236 Northwestern Univ), and San Diego State University (HHSN268201300005I / N01-HC-65237). The following Institutes/Centers/Offices have contributed to the HCHS/SOL through a transfer of funds to the NHLBI: National Institute on Minority Health and Health Disparities (NIMHD), National Institute on Deafness and Other Communication Disorders, National Institute of Dental and Craniofacial Research (NIDCR), National Institute of Diabetes and Digestive and Kidney Diseases, National Institute of Neurological Disorders and Stroke, NIH Institution-Office of Dietary Supplements. The Genetic Analysis Center at the University of Washington was supported by NHLBI and NIDCR contracts (HHSN268201300005C AM03 and MOD03). WGS for “NHLBI TOPMed: Whole Genome Sequencing and Related Phenotypes in the HCHS/SOL” (phs001395) was performed at the Baylor College of Medicine Human Genome Sequencing Center (HHSN268201600033I).

**HyperGEN:** We thank the HyperGEN Study participants and investigators for their significant contributions. HyperGEN is part of the NHLBI Family Blood Pressure Program; collection of the data represented here was supported by grants U01 HL054472, U01 HL054473, U01 HL054495, and U01 HL054509. The HyperGEN: Genetics of Left Ventricular Hypertrophy Study was supported by NHLBI grant R01 HL055673 with whole-genome sequencing made possible by supplement -18S1.



ARIC study investigator, Paul Stefan de Vries, was independently supported by American Heart Association grant number 18CDA34110116.

**JHS:** The JHS is supported and conducted in collaboration with Jackson State University (HHSN268201800013I), Tougaloo College (HHSN268201800014I), the Mississippi State Department of Health (HHSN268201800015I/HHSN26800001) and the University of Mississippi Medical Center (HHSN268201800010I, HHSN268201800011I and HHSN268201800012I) contracts from the NHLBI and the NIMHD. The authors also wish to thank the staffs and participants of the JHS.

JHS study investigator, Adam P. Bress was supported by 1K01HL133468-01 from the NHLBI, Bethesda, MD.

The views expressed in this manuscript are those of the authors and do not necessarily represent the views of the National Heart, Lung, and Blood Institute; the National Institutes of Health; or the U.S. Department of Health and Human Services.

**MESA:** WGS for the TOPMed program was supported by the NHLBI. WGS for “NHLBI TOPMed: Multi-Ethnic Study of Atherosclerosis (MESA)” (phs001416.v1.p1) was performed at the Broad Institute of MIT and Harvard (3U54HG003067-13S1). Centralized read mapping and genotype calling, along with variant quality metrics and filtering were provided by the TOPMed Informatics Research Center (3R01HL-117626-02S1). Phenotype harmonization, data management, sample-identity QC, and general study coordination, were provided by the TOPMed Data Coordinating Center (3R01HL-120393-02S1). MESA and the MESA SHARe project are conducted and supported by the NHLBI in collaboration with MESA investigators. Support for MESA is provided by contracts 75N92020D00001, HHSN268201500003I, N01-HC-95159, 75N92020D00005, N01-HC-95160, 75N92020D00002, N01-HC-95161, 75N92020D00003, N01-HC-95162, 75N92020D00006, N01-HC-95163, 75N92020D00004, N01-HC-95164, 75N92020D00007, N01-HC-95165, N01-HC-95166, N01-HC-95167, N01-HC-95168, N01-HC-95169, UL1-TR-000040, UL1-TR-001079, and UL1-TR-001420. The provision of genotyping data was supported in part by the National Center for Advancing Translational Sciences, CTSI grant UL1TR001881, and the National Institute of Diabetes and Digestive and Kidney Disease Diabetes Research Center (DRC) grant DK063491 to the Southern California Diabetes Endocrinology Research Center. MESA Family is conducted and supported by the NHLBI in collaboration with MESA investigators. Support is provided by grants and contracts R01HL071051, R01HL071205, R01HL071250, R01HL071251, R01HL071258, R01HL071259, and by the National Center for Research Resources, Grant UL1RR033176. The provision of genotyping data was supported in part by the National Center for Advancing Translational Sciences, CTSI grant UL1TR001881, and the National Institute of Diabetes and Digestive and Kidney Disease Diabetes Research Center (DRC) grant DK063491 to the Southern California Diabetes Endocrinology Research Center. Infrastructure for the CHARGE Consortium is supported in part by the National Heart, Lung, and Blood Institute (NHLBI) grant R01HL105756

**Million Veteran Program (MVP).** This research was supported by VA grant I01BX003360. The work is based on data from the Million Veteran Program, Office of Research and Development, Veterans Health Administration. This work was supported using resources and facilities of the VA Informatics and Computing Infrastructure (VINCI), VA HSR RES 13-457.

Jacklyn N. Hellwege is supported by T32CA160056 and K12HD043483. Ayush Giri is supported by K12HD043483. Todd L. Edwards is supported by R21HL121429

**REGARDS:** Support for REGARDS was provided by R01HL136666 and U01 NS041588.

**Samoan Study:** The Samoan study is supported by NIH/NHLBI grants, R01HL093093 and R01HL133040. WGS for the TOPMed program was supported by the NHLBI. We acknowledge the support from the Samoan Ministry of Health and Ministry of Women, Community and Social Development, local village government officials, and the generosity of our research staff, and all participants.

The Samoan Obesity, Lifestyle, and Genetic adaptations (OLaGA) Study group is comprised of the following members:

Brandon Blobner, Department of Human Genetics, University of Pittsburgh, Pittsburgh, PA, USA

Jenna C. Carlson, Department of Biostatistics, Graduate School of Public Health, University of Pittsburgh, Pittsburgh, PA, USA

Ranjan Deka, Department of Environmental Health, University of Cincinnati, Cincinnati, OH, USA

Nicola L. Hawley, Department of Chronic Disease Epidemiology, Yale University, New Haven, CT, USA

Stephen T McGarvey, Department of Epidemiology and International Health Institute, and Department of Anthropology, Brown University, Providence, RI, USA

Ryan L Minster, Department of Human Genetics, University of Pittsburgh, Pittsburgh, PA, USA

Take Naseri, Ministry of Health, Government of Samoa, Apia, Samoa

Muagututi'a Sefuiva Reupena, Lutia i Puava ae Mapu i Fagalele, Apia, Samoa

Daniel E. Weeks, Depts. of Human Genetics and Biostatistics, University of Pittsburgh, Pittsburgh, PA, USA

**THRV:** THRV is supported by the NHLBI grant (R01HL111249). THRV is a collaborative study between Washington University in St. Louis, Lundquist Institute for Biomedical Innovation at Harbor UCLA Medical Center, University of Texas in Houston, Taichung Veterans General Hospital, Taipei Veterans General Hospital, Tri-Service General Hospital, National Health Research Institutes, National Taiwan University, and Baylor University. THRV is based (substantially) on the parent SAPPHIRe study, along with additional population-based and hospital-based cohorts. SAPPHIRe was supported by NHLBI grants (U01HL54527, U01HL54498) and Taiwan funds, and the other cohorts were supported by Taiwan funds.

**UK Biobank:** The TOPMed-imputed UK Biobank association tests were conducted using the UK Biobank Resource through project ID number 24460.

UK Biobank investigator Gonçalo Abecasis was supported by NIH grant HG007022.

**WHI:** The WHI program is funded by the NHLBI through contracts HHSN268201600018C, HHSN268201600001C, HHSN268201600002C, HHSN268201600003C, and HHSN268201600004C. The TOPMed component of WHI was funded by NIH award X01 HL139376.

WHI investigator Nora Franceschini is funded by the NIH awards R01-MD012765, R01-DK117445-01A1 and R21-HL140385.

## **DISCLOSURES**

Stella Aslibekyan is currently an employee and holds stock options in 23andMe, Inc. Adam P. Bress receives research support to his institution from Novartis, Amgen, and Amarin. Girish N. Nadkarni is a co-founder of RenalytixAI and a member of the advisory board of RenalytixAI and owns equity in the same. Girish N. Nadkarni has received operational funding from Goldfinch Bio. Bruce M. Psaty serves on the Steering Committee of the Yale Open Data Access Project funded by Johnson & Johnson. Gonçalo R. Abecasis is an employee of Regeneron Pharmaceuticals; he owns stock and stock options for Regeneron Pharmaceuticals. This publication does not represent the views of the Department of Veterans Affairs or the United States Government.

## MILLION VETERAN PROGRAM: CONSORTIUM ACKNOWLEDGEMENT FOR MANUSCRIPTS

### MVP Executive Committee

- Co-Chair: J. Michael Gaziano, M.D., M.P.H.
- Co-Chair: Rachel Ramoni, D.M.D., Sc.D.
- Jim Breeling, M.D. (ex-officio)
- Kyong-Mi Chang, M.D.
- Grant Huang, Ph.D.
- Sumitra Muralidhar, Ph.D.
- Christopher J. O'Donnell, M.D., M.P.H.
- Philip S. Tsao, Ph.D.

### MVP Program Office

- Sumitra Muralidhar, Ph.D.
- Jennifer Moser, Ph.D.

### MVP Recruitment/Enrollment

- Recruitment/Enrollment Director/Deputy Director, Boston – Stacey B. Whitbourne, Ph.D.;  
Jessica V. Brewer, M.P.H.

### MVP Coordinating Centers

- Clinical Epidemiology Research Center (CERC), West Haven – John Concato, M.D., M.P.H.
- Cooperative Studies Program Clinical Research Pharmacy Coordinating Center,  
Albuquerque - Stuart Warren, J.D., Pharm D.; Dean P. Argyres, M.S.
- Genomics Coordinating Center, Palo Alto – Philip S. Tsao, Ph.D.
- Massachusetts Veterans Epidemiology Research Information Center (MAVERIC), Boston  
- J. Michael Gaziano, M.D., M.P.H.
- MVP Information Center, Canandaigua – Brady Stephens, M.S.
- Core Biorepository, Boston – Mary T. Brophy M.D., M.P.H.; Donald E. Humphries, Ph.D.
- MVP Informatics, Boston – Nhan Do, M.D.; Shahpoor Shayan
- Data Operations/Analytics, Boston – Xuan-Mai T. Nguyen, Ph.D.

### MVP Science

- Genomics - Christopher J. O'Donnell, M.D., M.P.H.; Saiju Pyarajan Ph.D.; Philip S. Tsao, Ph.D.
- Phenomics - Kelly Cho, M.P.H., Ph.D.
- Data and Computational Sciences – Saiju Pyarajan, Ph.D.
- Statistical Genetics – Elizabeth Hauser, Ph.D.; Yan Sun, Ph.D.; Hongyu Zhao, Ph.D.

### MVP Local Site Investigators

- Atlanta VA Medical Center (Peter Wilson)
- Bay Pines VA Healthcare System (Rachel McArdle)
- Birmingham VA Medical Center (Louis Dellitalia)
- Cincinnati VA Medical Center (John Harley)
- Clement J. Zablocki VA Medical Center (Jeffrey Whittle)
- Durham VA Medical Center (Jean Beckham)
- Edith Nourse Rogers Memorial Veterans Hospital (John Wells)
- Edward Hines, Jr. VA Medical Center (Salvador Gutierrez)
- Fayetteville VA Medical Center (Gretchen Gibson)
- VA Health Care Upstate New York (Laurence Kaminsky)
- New Mexico VA Health Care System (Gerardo Villareal)
- VA Boston Healthcare System (Scott Kinlay)
- VA Western New York Healthcare System (Junzhe Xu)

- Ralph H. Johnson VA Medical Center (Mark Hamner)
- Wm. Jennings Bryan Dorn VA Medical Center (Kathlyn Sue Haddock)
- VA North Texas Health Care System (Sujata Bhushan)
- Hampton VA Medical Center (Pran Iruvanti)
- Hunter Holmes McGuire VA Medical Center (Michael Godschalk)
- Iowa City VA Health Care System (Zuhair Ballas)
- Jack C. Montgomery VA Medical Center (Malcolm Buford)
- James A. Haley Veterans' Hospital (Stephen Mastorides)
- Louisville VA Medical Center (Jon Klein)
- Manchester VA Medical Center (Nora Ratcliffe)
- Miami VA Health Care System (Hermes Florez)
- Michael E. DeBakey VA Medical Center (Alan Swann)
- Minneapolis VA Health Care System (Maureen Murdoch)
- N. FL/S. GA Veterans Health System (Peruvemba Sriram)
- Northport VA Medical Center (Shing Shing Yeh)
- Overton Brooks VA Medical Center (Ronald Washburn)
- Philadelphia VA Medical Center (Darshana Jhala)
- Phoenix VA Health Care System (Samuel Aguayo)
- Portland VA Medical Center (David Cohen)
- Providence VA Medical Center (Satish Sharma)
- Richard Roudebush VA Medical Center (John Callaghan)
- Salem VA Medical Center (Kris Ann Oursler)
- San Francisco VA Health Care System (Mary Whooley)
- South Texas Veterans Health Care System (Sunil Ahuja)
- Southeast Louisiana Veterans Health Care System (Amparo Gutierrez)
- Southern Arizona VA Health Care System (Ronald Schifman)
- Sioux Falls VA Health Care System (Jennifer Greco)
- St. Louis VA Health Care System (Michael Rauchman)
- Syracuse VA Medical Center (Richard Servatius)
- VA Eastern Kansas Health Care System (Mary Oehlert)
- VA Greater Los Angeles Health Care System (Agnes Wallbom)
- VA Loma Linda Healthcare System (Ronald Fernando)
- VA Long Beach Healthcare System (Timothy Morgan)
- VA Maine Healthcare System (Todd Stapley)
- VA New York Harbor Healthcare System (Scott Sherman)
- VA Pacific Islands Health Care System (Gwenevere Anderson)
- VA Palo Alto Health Care System (Philip Tsao)
- VA Pittsburgh Health Care System (Elif Sonel)
- VA Puget Sound Health Care System (Edward Boyko)
- VA Salt Lake City Health Care System (Laurence Meyer)
- VA San Diego Healthcare System (Samir Gupta)
- VA Southern Nevada Healthcare System (Joseph Fayad)
- VA Tennessee Valley Healthcare System (Adriana Hung)
- Washington DC VA Medical Center (Jack Lichy)
- W.G. (Bill) Hefner VA Medical Center (Robin Hurley)
- White River Junction VA Medical Center (Brooks Robey)
- William S. Middleton Memorial Veterans Hospital (Robert Striker)
